# Supplementary material for: Calcium Homeostasis and Psychiatric Disorders: A Mendelian Randomization Study
Source: Nutrients. 2023 Sep 19;15(18):4051. doi: 10.3390/nu15184051 (PMC10535008; doi:10.3390/nu15184051)
Supplement: Supplementary file 1 [file nutrients-15-04051-s001.zip › Supplementary Tables.xlsx]

## Sheet: Decription
Table S1. Detailed information regarding studies and datasets used in MVMR analysis.
Table S2. Instrumental variables used in MR analysis.
Table S3. Power estimation of this Mendelian randomization analysis and sensitivity analysis of the causal association
Table S4. Association of genetically predicted calcium homeostasis with psychiatric disorders in univariable mendelian randomization.
Table S5. Multivariable mendelian randomization (MVMR) estimation between calcium and OCD.
Table S6. MVMR estimation between ASD and 25OHD.
Table S7. MVMR estimation between SCZ and 25OHD.
Table S8. MVMR estimation between BD and 25OHD.
Table S9. MVMR estimation between ADHD and calcium.
Table S10. MVMR estimation between ASD and FGF23.

## Sheet: Table S1
Table S1. Detailed information regarding studies and datasets used in MVMR analysis.
Exposure or Outcome	Reference	Participants	Web Source
Body Mass Index	/	461,460 individuals	*ukb-b-19953
Obesity	/	463,010 individuals	*ukb-b-15541
Mineral supplements: Calcium	/	336,314 individuals	*ukb-a-495
Mineral supplement use: Fish oil	/	64,949 individuals	*ukb-b-11138
Mineral supplements: Vitamin D	/	46,0351 individuals	*ukb-b-12648
Time spent outdoors in winter	/	364,465 individuals	*ukb-b-6811
Time spent outdoors in summer	/	419,314 individuals	*ukb-b-969
Years of schooling	PMID:30038396	766,345 individuals	*ieu-a-1239
Adopted as a child	/	461,805 individuals	*ukb-b-13183
Breastfed as a baby	/	352,094 individuals	*ukb-b-13423
Household income	/	397,751 individuals	*ukb-b-7408
*https://gwas.mrcieu.ac.uk/datasets/;Output from GWAS pipeline using Phesant-derived variables from UKBiobank.

## Sheet: Table S2
Table S2 Instrumental variables used in MR analysis.
Expoure	Outcome	SNP	Effect allele	Other allele	EAF	Exposure			Outcome			F value
						BETA	SE	Pvalue	BETA	SE	Pvalue
ASD	Serum 25-Hydroxyvitamin D levels	rs10110094	G	A	0.8549	-0.0906996	0.0191	2.05e-06	0.001243	0.002718	0.64743	94.7855
ASD	Serum 25-Hydroxyvitamin D levels	rs111931861	G	A	0.0567	0.216901	0.0409	1.12e-07	-0.001023	0.005403	0.84985	234.427
ASD	Serum 25-Hydroxyvitamin D levels	rs112635299	T	G	0.0169	0.220997	0.0432	3.04e-07	-0.011947	0.006841	0.08077	75.3396
ASD	Serum 25-Hydroxyvitamin D levels	rs113003385	A	G	0.0527	0.132597	0.0293	6.06e-06	0.002622	0.00372	0.480889	81.506
ASD	Serum 25-Hydroxyvitamin D levels	rs115833252	T	C	0.0278	0.232999	0.0524	8.74e-06	-0.017503	0.00555	0.00162002	136.41
ASD	Serum 25-Hydroxyvitamin D levels	rs116346488	A	G	0.0457	0.143104	0.032	7.58e-06	-0.004712	0.004595	0.305087	82.9358
ASD	Serum 25-Hydroxyvitamin D levels	rs116977567	G	T	0.0258	0.195601	0.0429	5.04e-06	-0.003411	0.00568	0.548176	89.3114
ASD	Serum 25-Hydroxyvitamin D levels	rs11787216	T	C	0.333	-0.0692	0.0147	2.59e-06	0.002869	0.002059	0.163563	98.8025
ASD	Serum 25-Hydroxyvitamin D levels	rs141319505	G	A	0.0308	-0.290698	0.061	1.88e-06	-0.008336	0.007404	0.260227	235.021
ASD	Serum 25-Hydroxyvitamin D levels	rs141455452	G	T	0.4334	-0.0784044	0.0159	8.94e-07	-0.002743	0.00223	0.218561	140.353
ASD	Serum 25-Hydroxyvitamin D levels	rs144911765	C	T	0.0268	0.190096	0.0403	2.36e-06	0.008309	0.005483	0.129697	87.5313
ASD	Serum 25-Hydroxyvitamin D levels	rs148587110	C	T	0.0149	0.330103	0.0737	7.4e-06	-0.006037	0.009027	0.503706	148.737
ASD	Serum 25-Hydroxyvitamin D levels	rs149923766	G	T	0.0119	0.237306	0.0484	9.61e-07	-0.004519	0.00712	0.525604	61.4613
ASD	Serum 25-Hydroxyvitamin D levels	rs1522603	C	T	0.4871	-0.0636975	0.014	5.34e-06	7e-06	0.001949	0.997174	94.1538
ASD	Serum 25-Hydroxyvitamin D levels	rs16933101	A	G	0.0467	-0.152802	0.0345	9.42e-06	0.008761	0.004651	0.0596252	96.5538
ASD	Serum 25-Hydroxyvitamin D levels	rs17517971	A	G	0.0596	0.141404	0.0319	9.62e-06	-0.002543	0.0041	0.535011	104.116
ASD	Serum 25-Hydroxyvitamin D levels	rs201179706	T	C	0.5179	-0.0685037	0.0155	9.82e-06	0.000112	0.004742	0.98115	108.866
ASD	Serum 25-Hydroxyvitamin D levels	rs2391769	G	A	0.67	0.0769026	0.0145	1.14e-07	-0.002593	0.002031	0.201768	121.526
ASD	Serum 25-Hydroxyvitamin D levels	rs28729902	G	A	0.1958	0.0839035	0.0178	2.34e-06	-0.004119	0.002547	0.1058	102.982
ASD	Serum 25-Hydroxyvitamin D levels	rs292441	A	G	0.673	-0.0724954	0.0149	1.12e-06	-9.9e-05	0.002102	0.962347	107.461
ASD	Serum 25-Hydroxyvitamin D levels	rs325485	G	A	0.6262	-0.0728043	0.0143	3.25e-07	0.000189	0.001993	0.924552	115.294
ASD	Serum 25-Hydroxyvitamin D levels	rs34509057	A	G	0.2455	0.0728972	0.0165	9.73e-06	-0.001168	0.002328	0.615766	91.4217
ASD	Serum 25-Hydroxyvitamin D levels	rs35404050	T	C	0.2117	0.0843044	0.0176	1.61e-06	-0.000698	0.002373	0.768483	110.206
ASD	Serum 25-Hydroxyvitamin D levels	rs45595836	T	C	0.0934	0.138996	0.0272	3.13e-07	-0.001716	0.003784	0.650291	152.143
ASD	Serum 25-Hydroxyvitamin D levels	rs4750990	C	T	0.3857	0.0680968	0.0141	1.37e-06	-8e-05	0.002	0.967978	102.07
ASD	Serum 25-Hydroxyvitamin D levels	rs4916723	C	A	0.4135	0.067305	0.0141	1.92e-06	0.002508	0.001986	0.206633	102.06
ASD	Serum 25-Hydroxyvitamin D levels	rs529507	G	A	0.1481	0.0908004	0.02	5.76e-06	-0.004479	0.002833	0.113873	96.6239
ASD	Serum 25-Hydroxyvitamin D levels	rs6430841	G	A	0.1829	-0.0795041	0.0176	6.4e-06	-0.000119	0.002468	0.961367	87.7304
ASD	Serum 25-Hydroxyvitamin D levels	rs644552	A	G	0.0626	0.159403	0.0346	4.21e-06	-0.000822	0.004621	0.858809	138.628
ASD	Serum 25-Hydroxyvitamin D levels	rs6692705	G	A	0.6093	-0.0656005	0.0141	3.26e-06	0.001168	0.001982	0.555888	95.157
ASD	Serum 25-Hydroxyvitamin D levels	rs684502	T	G	0.5835	-0.0626949	0.0142	9.71e-06	-0.000647	0.00205	0.752329	88.718
ASD	Serum 25-Hydroxyvitamin D levels	rs72934503	G	A	0.4831	0.0704976	0.0141	5.89e-07	0.000783	0.002081	0.70661	115.327
ASD	Serum 25-Hydroxyvitamin D levels	rs7578456	G	A	0.5974	-0.0635005	0.0141	6.53e-06	0.00221	0.001989	0.266403	90.0736
ASD	Serum 25-Hydroxyvitamin D levels	rs76397219	G	A	0.0825	0.140297	0.0303	3.57e-06	-0.004861	0.003699	0.188804	138.52
ASD	Serum 25-Hydroxyvitamin D levels	rs77691144	C	T	0.0318	0.207406	0.0435	1.91e-06	-0.008847	0.005573	0.112443	123.097
ASD	Serum 25-Hydroxyvitamin D levels	rs7783557	C	T	0.3211	-0.0670042	0.0146	4.36e-06	-0.00146	0.002028	0.471603	90.8996
ASD	Serum 25-Hydroxyvitamin D levels	rs78058104	A	G	0.0328	0.187898	0.0397	2.22e-06	-0.001176	0.005634	0.834712	104.057
ASD	Serum 25-Hydroxyvitamin D levels	rs78298487	G	T	0.0119	0.255396	0.0575	9e-06	-0.009009	0.006932	0.193715	71.2039
ASD	Serum 25-Hydroxyvitamin D levels	rs78653484	T	C	0.0507	-0.176296	0.0385	4.67e-06	-0.007206	0.005376	0.180159	139.078
ASD	Serum 25-Hydroxyvitamin D levels	rs78827416	A	G	0.0746	0.130502	0.0266	9e-07	-0.000342	0.003672	0.925855	109.241
ASD	Serum 25-Hydroxyvitamin D levels	rs79940520	G	A	0.1481	0.0953992	0.0207	4.26e-06	0.006504	0.002741	0.017695	106.682
ASD	Serum 25-Hydroxyvitamin D levels	rs910805	A	G	0.7644	-0.0956963	0.016	2.04e-09	0.002706	0.002278	0.234757	153.385
ASD	Serum 25-Hydroxyvitamin D levels	rs9366877	G	A	0.4274	-0.0684994	0.0139	9.05e-07	0.005411	0.001957	0.00569902	106.689
ASD	Serum 25-Hydroxyvitamin D levels	rs9389208	T	C	0.3767	0.0672006	0.0144	3.12e-06	-0.000823	0.002032	0.685528	98.4968
ASD	fibroblast growth factor 23	rs10110094	G	A	0.8549	-0.0906996	0.0191	2.04998e-06	0.0194	0.0153	0.2059	94.7855
ASD	fibroblast growth factor 23	rs111931861	G	A	0.0567	0.216901	0.0409	1.118e-07	0.0263	0.0339	0.4371	234.427
ASD	fibroblast growth factor 23	rs112635299	T	G	0.0169	0.220997	0.0432	3.04397e-07	0.0773	0.0378	0.0409798	75.3396
ASD	fibroblast growth factor 23	rs113003385	A	G	0.0527	0.132597	0.0293	6.05899e-06	0.0252	0.0247	0.3072	81.506
ASD	fibroblast growth factor 23	rs115833252	T	C	0.0278	0.232999	0.0524	8.73997e-06	0.0122	0.0357	0.732399	136.41
ASD	fibroblast growth factor 23	rs116346488	A	G	0.0457	0.143104	0.032	7.58298e-06	-0.0296	0.0248	0.2324	82.9358
ASD	fibroblast growth factor 23	rs116977567	G	T	0.0258	0.195601	0.0429	5.04301e-06	0.055	0.0327	0.0923209	89.3114
ASD	fibroblast growth factor 23	rs11787216	T	C	0.333	-0.0692	0.0147	2.58702e-06	-0.0007	0.0116	0.9535	98.8025
ASD	fibroblast growth factor 23	rs141319505	G	A	0.0308	-0.290698	0.061	1.87599e-06	-0.0328	0.0458	0.473301	235.021
ASD	fibroblast growth factor 23	rs141455452	G	T	0.4334	-0.0784044	0.0159	8.93902e-07	0.0016	0.0147	0.9112	140.353
ASD	fibroblast growth factor 23	rs144911765	C	T	0.0268	0.190096	0.0403	2.36401e-06	-0.0135	0.0373	0.7171	87.5313
ASD	fibroblast growth factor 23	rs1452075	T	C	0.7157	0.080704	0.0155	2.069e-07	-0.0094	0.0114	0.4093	123.172
ASD	fibroblast growth factor 23	rs148587110	C	T	0.0149	0.330103	0.0737	7.39997e-06	-0.0157	0.0507	0.757201	148.737
ASD	fibroblast growth factor 23	rs149923766	G	T	0.0119	0.237306	0.0484	9.61192e-07	-0.0127	0.0384	0.7399	61.4613
ASD	fibroblast growth factor 23	rs1522603	C	T	0.4871	-0.0636975	0.014	5.34306e-06	-0.0218	0.0116	0.0604798	94.1538
ASD	fibroblast growth factor 23	rs16933101	A	G	0.0467	-0.152802	0.0345	9.42193e-06	-0.0145	0.026	0.577801	96.5538
ASD	fibroblast growth factor 23	rs17517971	A	G	0.0596	0.141404	0.0319	9.61502e-06	-0.007	0.0216	0.7457	104.116
ASD	fibroblast growth factor 23	rs201179706	T	C	0.5179	-0.0685037	0.0155	9.82291e-06	0.0015	0.0217	0.9453	108.866
ASD	fibroblast growth factor 23	rs2391769	G	A	0.67	0.0769026	0.0145	1.13501e-07	0.0031	0.0113	0.784599	121.526
ASD	fibroblast growth factor 23	rs28729902	G	A	0.1958	0.0839035	0.0178	2.34498e-06	-0.0005	0.0133	0.9728	102.982
ASD	fibroblast growth factor 23	rs292441	A	G	0.673	-0.0724954	0.0149	1.12401e-06	0.0001	0.0127	0.9946	107.461
ASD	fibroblast growth factor 23	rs325485	G	A	0.6262	-0.0728043	0.0143	3.25402e-07	-0.0144	0.0108	0.1834	115.294
ASD	fibroblast growth factor 23	rs34509057	A	G	0.2455	0.0728972	0.0165	9.72501e-06	0.005	0.0123	0.6818	91.4217
ASD	fibroblast growth factor 23	rs35404050	T	C	0.2117	0.0843044	0.0176	1.60602e-06	0.0323	0.014	0.0212202	110.206
ASD	fibroblast growth factor 23	rs45595836	T	C	0.0934	0.138996	0.0272	3.13098e-07	0.0276	0.0232	0.2331	152.143
ASD	fibroblast growth factor 23	rs4750990	C	T	0.3857	0.0680968	0.0141	1.37101e-06	0.0033	0.011	0.7648	102.07
ASD	fibroblast growth factor 23	rs4916723	C	A	0.4135	0.067305	0.0141	1.92398e-06	0.011	0.0113	0.3309	102.06
ASD	fibroblast growth factor 23	rs529507	G	A	0.1481	0.0908004	0.02	5.75705e-06	0.0169	0.0167	0.3128	96.6239
ASD	fibroblast growth factor 23	rs6430841	G	A	0.1829	-0.0795041	0.0176	6.40206e-06	0.0143	0.0142	0.3147	87.7304
ASD	fibroblast growth factor 23	rs644552	A	G	0.0626	0.159403	0.0346	4.21105e-06	0.019	0.0232	0.4144	138.628
ASD	fibroblast growth factor 23	rs6692705	G	A	0.6093	-0.0656005	0.0141	3.26302e-06	-0.0234	0.0117	0.0461796	95.157
ASD	fibroblast growth factor 23	rs684502	T	G	0.5835	-0.0626949	0.0142	9.71002e-06	0.0034	0.014	0.8095	88.718
ASD	fibroblast growth factor 23	rs72934503	G	A	0.4831	0.0704976	0.0141	5.89196e-07	0.0101	0.0157	0.5181	115.327
ASD	fibroblast growth factor 23	rs7578456	G	A	0.5974	-0.0635005	0.0141	6.53206e-06	-0.0166	0.0106	0.1182	90.0736
ASD	fibroblast growth factor 23	rs76397219	G	A	0.0825	0.140297	0.0303	3.56599e-06	-0.0103	0.0236	0.6635	138.52
ASD	fibroblast growth factor 23	rs77691144	C	T	0.0318	0.207406	0.0435	1.90999e-06	-0.033	0.0362	0.3625	123.097
ASD	fibroblast growth factor 23	rs7783557	C	T	0.3211	-0.0670042	0.0146	4.36305e-06	-0.0001	0.0112	0.9916	90.8996
ASD	fibroblast growth factor 23	rs78058104	A	G	0.0328	0.187898	0.0397	2.22101e-06	0.0579	0.0332	0.08127	104.057
ASD	fibroblast growth factor 23	rs78298487	G	T	0.0119	0.255396	0.0575	9.00492e-06	-0.0217	0.048	0.6517	71.2039
ASD	fibroblast growth factor 23	rs78653484	T	C	0.0507	-0.176296	0.0385	4.67498e-06	0.0474	0.0255	0.0628999	139.078
ASD	fibroblast growth factor 23	rs78827416	A	G	0.0746	0.130502	0.0266	8.99995e-07	0.013	0.0209	0.534399	109.241
ASD	fibroblast growth factor 23	rs79940520	G	A	0.1481	0.0953992	0.0207	4.26e-06	0.0122	0.0192	0.5235	106.682
ASD	fibroblast growth factor 23	rs910805	A	G	0.7644	-0.0956963	0.016	2.04099e-09	-0.0093	0.0127	0.4649	153.385
ASD	fibroblast growth factor 23	rs9366877	G	A	0.4274	-0.0684994	0.0139	9.05295e-07	0.0067	0.0104	0.5221	106.689
ASD	fibroblast growth factor 23	rs9389208	T	C	0.3767	0.0672006	0.0144	3.12097e-06	0.0027	0.0117	0.8158	98.4968
ASD	Parathyroid hormone	rs10110094	G	A	0.8549	-0.0906996	0.0191	2.04998e-06	0.0013	0.0357	0.977237	94.7855
ASD	Parathyroid hormone	rs111931861	G	A	0.0567	0.216901	0.0409	1.118e-07	0.0828	0.0701	0.239883	234.427
ASD	Parathyroid hormone	rs112635299	T	G	0.0169	0.220997	0.0432	3.04397e-07	0.0583	0.0844	0.489779	75.3396
ASD	Parathyroid hormone	rs113003385	A	G	0.0527	0.132597	0.0293	6.05899e-06	-0.0426	0.0483	0.380189	81.506
ASD	Parathyroid hormone	rs115833252	T	C	0.0278	0.232999	0.0524	8.73997e-06	-0.0463	0.0749	0.537032	136.41
ASD	Parathyroid hormone	rs116346488	A	G	0.0457	0.143104	0.032	7.58298e-06	0.0504	0.0591	0.389045	82.9358
ASD	Parathyroid hormone	rs116977567	G	T	0.0258	0.195601	0.0429	5.04301e-06	-0.008	0.0711	0.912011	89.3114
ASD	Parathyroid hormone	rs11787216	T	C	0.333	-0.0692	0.0147	2.58702e-06	-0.0242	0.0265	0.363078	98.8025
ASD	Parathyroid hormone	rs141319505	G	A	0.0308	-0.290698	0.061	1.87599e-06	-0.0125	0.0869	0.891251	235.021
ASD	Parathyroid hormone	rs141455452	G	T	0.4334	-0.0784044	0.0159	8.93902e-07	-0.0118	0.0279	0.676083	140.353
ASD	Parathyroid hormone	rs144911765	C	T	0.0268	0.190096	0.0403	2.36401e-06	-0.0114	0.0693	0.870964	87.5313
ASD	Parathyroid hormone	rs1452075	T	C	0.7157	0.080704	0.0155	2.069e-07	-0.0547	0.0278	0.0489779	123.172
ASD	Parathyroid hormone	rs148587110	C	T	0.0149	0.330103	0.0737	7.39997e-06	0.0066	0.1177	0.954993	148.737
ASD	Parathyroid hormone	rs149923766	G	T	0.0119	0.237306	0.0484	9.61192e-07	-0.1567	0.0967	0.104713	61.4613
ASD	Parathyroid hormone	rs1522603	C	T	0.4871	-0.0636975	0.014	5.34306e-06	0.005	0.0254	0.851138	94.1538
ASD	Parathyroid hormone	rs16933101	A	G	0.0467	-0.152802	0.0345	9.42193e-06	-0.0684	0.0585	0.239883	96.5538
ASD	Parathyroid hormone	rs17517971	A	G	0.0596	0.141404	0.0319	9.61502e-06	0.0531	0.0517	0.301995	104.116
ASD	Parathyroid hormone	rs2391769	G	A	0.67	0.0769026	0.0145	1.13501e-07	0.012	0.0256	0.630957	121.526
ASD	Parathyroid hormone	rs28729902	G	A	0.1958	0.0839035	0.0178	2.34498e-06	-0.0001	0.0324	1	102.982
ASD	Parathyroid hormone	rs292441	A	G	0.673	-0.0724954	0.0149	1.12401e-06	0.058	0.0267	0.0295121	107.461
ASD	Parathyroid hormone	rs325485	G	A	0.6262	-0.0728043	0.0143	3.25402e-07	0.0162	0.0253	0.524807	115.294
ASD	Parathyroid hormone	rs34509057	A	G	0.2455	0.0728972	0.0165	9.72501e-06	-0.0187	0.029	0.512861	91.4217
ASD	Parathyroid hormone	rs35404050	T	C	0.2117	0.0843044	0.0176	1.60602e-06	0.0128	0.0305	0.676083	110.206
ASD	Parathyroid hormone	rs45595836	T	C	0.0934	0.138996	0.0272	3.13098e-07	-0.1067	0.0473	0.0239883	152.143
ASD	Parathyroid hormone	rs4750990	C	T	0.3857	0.0680968	0.0141	1.37101e-06	0.0143	0.0252	0.57544	102.07
ASD	Parathyroid hormone	rs4916723	C	A	0.4135	0.067305	0.0141	1.92398e-06	-0.016	0.0257	0.537032	102.06
ASD	Parathyroid hormone	rs529507	G	A	0.1481	0.0908004	0.02	5.75705e-06	-0.0051	0.0365	0.891251	96.6239
ASD	Parathyroid hormone	rs6430841	G	A	0.1829	-0.0795041	0.0176	6.40206e-06	0.0202	0.0316	0.524807	87.7304
ASD	Parathyroid hormone	rs644552	A	G	0.0626	0.159403	0.0346	4.21105e-06	-0.0085	0.0583	0.891251	138.628
ASD	Parathyroid hormone	rs6692705	G	A	0.6093	-0.0656005	0.0141	3.26302e-06	-0.0007	0.0252	0.977237	95.157
ASD	Parathyroid hormone	rs684502	T	G	0.5835	-0.0626949	0.0142	9.71002e-06	0.0235	0.0258	0.363078	88.718
ASD	Parathyroid hormone	rs72934503	G	A	0.4831	0.0704976	0.0141	5.89196e-07	-0.0062	0.0253	0.812831	115.327
ASD	Parathyroid hormone	rs7578456	G	A	0.5974	-0.0635005	0.0141	6.53206e-06	-0.0482	0.0249	0.0524807	90.0736
ASD	Parathyroid hormone	rs76397219	G	A	0.0825	0.140297	0.0303	3.56599e-06	-0.053	0.0448	0.234423	138.52
ASD	Parathyroid hormone	rs77691144	C	T	0.0318	0.207406	0.0435	1.90999e-06	-0.0189	0.0666	0.776247	123.097
ASD	Parathyroid hormone	rs7783557	C	T	0.3211	-0.0670042	0.0146	4.36305e-06	-0.04	0.0265	0.131826	90.8996
ASD	Parathyroid hormone	rs78058104	A	G	0.0328	0.187898	0.0397	2.22101e-06	-0.0648	0.0669	0.331131	104.057
ASD	Parathyroid hormone	rs78298487	G	T	0.0119	0.255396	0.0575	9.00492e-06	0.0182	0.0897	0.831764	71.2039
ASD	Parathyroid hormone	rs78653484	T	C	0.0507	-0.176296	0.0385	4.67498e-06	0.0173	0.074	0.812831	139.078
ASD	Parathyroid hormone	rs78827416	A	G	0.0746	0.130502	0.0266	8.99995e-07	0.0049	0.0458	0.912011	109.241
ASD	Parathyroid hormone	rs79940520	G	A	0.1481	0.0953992	0.0207	4.26e-06	0.0556	0.0349	0.109648	106.682
ASD	Parathyroid hormone	rs910805	A	G	0.7644	-0.0956963	0.016	2.04099e-09	0.0637	0.0292	0.0288403	153.385
ASD	Parathyroid hormone	rs9366877	G	A	0.4274	-0.0684994	0.0139	9.05295e-07	0.0018	0.0249	0.933254	106.689
ASD	Parathyroid hormone	rs9389208	T	C	0.3767	0.0672006	0.0144	3.12097e-06	-0.0125	0.0259	0.630957	98.4968
ADHD	Serum 25-Hydroxyvitamin D levels	rs10177879	C	T	0.9702	-0.132001	0.0292	6.17e-06	-0.0043	0.005814	0.459481	78.0422
ADHD	Serum 25-Hydroxyvitamin D levels	rs10430636	G	A	0.6879	-0.0488962	0.01	1.01e-06	0.002819	0.002119	0.183486	79.5195
ADHD	Serum 25-Hydroxyvitamin D levels	rs10795678	C	T	0.4115	0.0533038	0.0097	3.9e-08	-0.00154	0.002005	0.442398	106.632
ADHD	Serum 25-Hydroxyvitamin D levels	rs10810147	G	A	0.6233	0.0481995	0.0094	2.93e-07	-0.002144	0.001988	0.280644	84.5105
ADHD	Serum 25-Hydroxyvitamin D levels	rs10965176	G	T	0.8131	0.0619978	0.0114	5.38e-08	0.003528	0.002454	0.150606	90.5049
ADHD	Serum 25-Hydroxyvitamin D levels	rs11121053	G	A	0.4056	0.0434043	0.0098	9.47e-06	0.004231	0.001979	0.0325289	70.355
ADHD	Serum 25-Hydroxyvitamin D levels	rs112741090	G	T	0.9423	0.0908	0.019	1.76e-06	-0.001878	0.003946	0.634168	69.4361
ADHD	Serum 25-Hydroxyvitamin D levels	rs115111850	A	G	0.9523	-0.114895	0.0204	1.78e-08	0.002716	0.004107	0.508383	92.9121
ADHD	Serum 25-Hydroxyvitamin D levels	rs11552464	T	G	0.8151	-0.0620988	0.0127	1.01e-06	0.007329	0.002644	0.00558998	90.0489
ADHD	Serum 25-Hydroxyvitamin D levels	rs115607392	T	C	0.9751	-0.131305	0.0287	4.76e-06	-0.005772	0.00571	0.3121	64.8389
ADHD	Serum 25-Hydroxyvitamin D levels	rs11596214	G	A	0.5596	0.0528012	0.0095	2.73e-08	-0.003162	0.001998	0.113567	106.48
ADHD	Serum 25-Hydroxyvitamin D levels	rs1162202	C	T	0.6004	0.0613961	0.0102	1.75e-09	0.001896	0.002036	0.351722	140.214
ADHD	Serum 25-Hydroxyvitamin D levels	rs11649759	T	C	0.9672	-0.128004	0.0249	2.74e-07	-0.004717	0.005147	0.359432	80.5279
ADHD	Serum 25-Hydroxyvitamin D levels	rs12218778	G	A	0.8072	-0.0530949	0.0119	8.13e-06	0.003058	0.002541	0.228861	67.957
ADHD	Serum 25-Hydroxyvitamin D levels	rs12298657	C	T	0.7654	0.0509973	0.011	3.55e-06	-0.000108	0.002246	0.961504	72.3393
ADHD	Serum 25-Hydroxyvitamin D levels	rs1246268	T	G	0.3111	-0.050399	0.01	4.66e-07	0.003368	0.002094	0.107786	84.3395
ADHD	Serum 25-Hydroxyvitamin D levels	rs12819667	C	T	0.4433	0.0556996	0.0093	2.11e-09	-0.002439	0.001949	0.210804	118.672
ADHD	Serum 25-Hydroxyvitamin D levels	rs12952581	G	A	0.6342	-0.0440982	0.0096	4.36e-06	0.002887	0.002022	0.153451	69.8815
ADHD	Serum 25-Hydroxyvitamin D levels	rs13099657	G	A	0.8211	-0.0523043	0.0113	3.68e-06	-0.00193	0.002432	0.427429	62.2429
ADHD	Serum 25-Hydroxyvitamin D levels	rs13163845	T	C	0.8479	0.0708032	0.0138	2.89e-07	-0.001567	0.002775	0.572248	100.185
ADHD	Serum 25-Hydroxyvitamin D levels	rs13172973	G	A	0.6889	0.047103	0.0103	4.81e-06	-0.002954	0.002152	0.169865	73.659
ADHD	Serum 25-Hydroxyvitamin D levels	rs13176429	T	C	0.337	-0.0523043	0.0099	1.27e-07	0.000428	0.002092	0.837833	94.7128
ADHD	Serum 25-Hydroxyvitamin D levels	rs1335762	T	C	0.5736	-0.0440982	0.0096	4.36e-06	0.001657	0.001965	0.398949	73.6783
ADHD	Serum 25-Hydroxyvitamin D levels	rs1336187	G	A	0.5209	-0.0458031	0.0095	1.43e-06	0.002894	0.00197	0.141706	81.1119
ADHD	Serum 25-Hydroxyvitamin D levels	rs13387644	G	A	0.5378	-0.0486967	0.0093	1.64e-07	0.001301	0.001955	0.505888	91.3314
ADHD	Serum 25-Hydroxyvitamin D levels	rs1343667	C	T	0.4284	0.0555955	0.0107	2.04e-07	0.002454	0.00196	0.210427	117.311
ADHD	Serum 25-Hydroxyvitamin D levels	rs1387671	T	G	0.495	0.0458048	0.0094	1.1e-06	-0.003009	0.001958	0.124369	81.2517
ADHD	Serum 25-Hydroxyvitamin D levels	rs139950543	G	A	0.9871	-0.189999	0.0398	1.81e-06	-0.000592	0.008895	0.946889	71.2052
ADHD	Serum 25-Hydroxyvitamin D levels	rs1431771	C	T	0.4433	-0.0473013	0.0107	9.84e-06	-0.003043	0.001956	0.119705	85.5467
ADHD	Serum 25-Hydroxyvitamin D levels	rs145969813	C	A	0.9274	-0.0996988	0.021	2.06e-06	-0.004153	0.003629	0.252414	103.711
ADHD	Serum 25-Hydroxyvitamin D levels	rs150658015	T	C	0.9742	0.119604	0.0251	1.89e-06	-3.5e-05	0.005962	0.995246	55.6836
ADHD	Serum 25-Hydroxyvitamin D levels	rs1686469	A	G	0.3459	-0.0478046	0.01	1.75e-06	-0.000367	0.002107	0.861589	80.1019
ADHD	Serum 25-Hydroxyvitamin D levels	rs17015512	T	C	0.66	-0.0494949	0.0097	3.35e-07	-0.001764	0.002001	0.378087	85.1688
ADHD	Serum 25-Hydroxyvitamin D levels	rs17017439	C	T	0.7058	0.0479994	0.0099	1.24e-06	-0.000658	0.00205	0.748416	74.1088
ADHD	Serum 25-Hydroxyvitamin D levels	rs17597578	T	C	0.8708	0.0803996	0.0155	2.14e-07	-0.004096	0.003082	0.183862	112.714
ADHD	Serum 25-Hydroxyvitamin D levels	rs1760892	T	C	0.2485	-0.0505041	0.0111	5.37e-06	-0.00134	0.002259	0.552906	73.7873
ADHD	Serum 25-Hydroxyvitamin D levels	rs17718444	C	T	0.6481	0.0611986	0.0103	2.82e-09	-0.00219	0.002083	0.293143	132.417
ADHD	Serum 25-Hydroxyvitamin D levels	rs17758391	G	A	0.6909	0.0544977	0.0105	2.1e-07	0.002781	0.002107	0.186859	98.2833
ADHD	Serum 25-Hydroxyvitamin D levels	rs1790087	T	C	0.2247	-0.0555973	0.0114	1.08e-06	0.002576	0.002409	0.284823	83.427
ADHD	Serum 25-Hydroxyvitamin D levels	rs1791785	C	T	0.7485	-0.0515038	0.0106	1.18e-06	-0.003163	0.002182	0.147172	77.3574
ADHD	Serum 25-Hydroxyvitamin D levels	rs2025286	A	C	0.5437	-0.0548998	0.0093	3.57e-09	-0.001641	0.001971	0.404911	115.894
ADHD	Serum 25-Hydroxyvitamin D levels	rs2063640	C	A	0.9056	0.0894019	0.0202	9.61e-06	0.000657	0.003301	0.842315	105.89
ADHD	Serum 25-Hydroxyvitamin D levels	rs2107099	G	A	0.5427	-0.0490012	0.0095	2.5e-07	0.000885	0.001971	0.653595	92.3317
ADHD	Serum 25-Hydroxyvitamin D levels	rs2153168	C	T	0.8091	0.0639039	0.0138	3.64e-06	0.001798	0.003074	0.558689	97.7396
ADHD	Serum 25-Hydroxyvitamin D levels	rs247816	T	C	0.2942	-0.0618967	0.0136	5.33e-06	-0.001653	0.002151	0.442248	123.313
ADHD	Serum 25-Hydroxyvitamin D levels	rs2582895	C	A	0.6173	0.0724974	0.0096	4.29e-14	0.005893	0.002026	0.00363203	192.636
ADHD	Serum 25-Hydroxyvitamin D levels	rs263152	C	T	0.673	-0.0475005	0.0102	3.21e-06	-0.000646	0.002142	0.76312	76.9218
ADHD	Serum 25-Hydroxyvitamin D levels	rs2651569	T	C	0.4483	0.0465973	0.0094	7.15e-07	-0.001719	0.001948	0.377401	83.1991
ADHD	Serum 25-Hydroxyvitamin D levels	rs281297	T	C	0.6223	-0.0513986	0.0098	1.56e-07	-0.000245	0.002031	0.904152	96.216
ADHD	Serum 25-Hydroxyvitamin D levels	rs283469	G	T	0.7137	-0.0538967	0.0112	1.49e-06	-0.001183	0.002015	0.557229	91.9678
ADHD	Serum 25-Hydroxyvitamin D levels	rs2838762	A	C	0.4225	0.043701	0.0096	5.31e-06	-0.005867	0.002011	0.00354503	72.1815
ADHD	Serum 25-Hydroxyvitamin D levels	rs2886697	G	A	0.6521	0.0587971	0.0096	9.09e-10	-0.002246	0.002014	0.264955	121.568
ADHD	Serum 25-Hydroxyvitamin D levels	rs2933195	A	G	0.5467	-0.0423962	0.0094	6.48e-06	0.000422	0.001949	0.828409	68.9975
ADHD	Serum 25-Hydroxyvitamin D levels	rs3001723	G	A	0.674	-0.0788051	0.0102	1.11e-14	-0.003927	0.00212	0.0639514	211.754
ADHD	Serum 25-Hydroxyvitamin D levels	rs3098651	T	C	0.2525	0.0505981	0.0112	6.25e-06	-0.003009	0.002266	0.184187	74.8547
ADHD	Serum 25-Hydroxyvitamin D levels	rs34008721	T	C	0.6203	-0.0511038	0.0095	7.48e-08	0.004663	0.001998	0.0196241	95.3109
ADHD	Serum 25-Hydroxyvitamin D levels	rs34012672	C	T	0.8718	0.0656005	0.0137	1.68e-06	0.004742	0.002747	0.0843568	74.5067
ADHD	Serum 25-Hydroxyvitamin D levels	rs35207123	A	C	0.8062	-0.0559039	0.0119	2.63e-06	0.001763	0.002526	0.485199	75.6422
ADHD	Serum 25-Hydroxyvitamin D levels	rs3782470	T	C	0.1034	-0.0720977	0.0153	2.45e-06	-0.001582	0.003135	0.613826	74.6517
ADHD	Serum 25-Hydroxyvitamin D levels	rs3810414	T	C	0.7177	0.0515008	0.0105	9.35e-07	-0.004247	0.002188	0.0522565	83.2544
ADHD	Serum 25-Hydroxyvitamin D levels	rs40071	T	C	0.8072	0.0683033	0.0142	1.51e-06	-0.00356	0.002536	0.160336	112.528
ADHD	Serum 25-Hydroxyvitamin D levels	rs4613308	T	C	0.4881	-0.0507987	0.0106	1.65e-06	0.00197	0.001942	0.310389	99.9121
ADHD	Serum 25-Hydroxyvitamin D levels	rs4684906	A	G	0.6899	0.0452984	0.0099	4.75e-06	-0.001682	0.002093	0.421492	67.9975
ADHD	Serum 25-Hydroxyvitamin D levels	rs4773306	G	A	0.4503	-0.0423023	0.0095	8.47e-06	-0.000261	0.001961	0.894305	68.6117
ADHD	Serum 25-Hydroxyvitamin D levels	rs4884	A	G	0.3091	-0.052199	0.0105	6.65e-07	0.000943	0.002148	0.660512	90.1576
ADHD	Serum 25-Hydroxyvitamin D levels	rs4916723	A	C	0.5865	-0.0852965	0.011	8.89e-15	-0.002508	0.001986	0.206633	274.031
ADHD	Serum 25-Hydroxyvitamin D levels	rs4925811	T	G	0.5338	-0.0579999	0.0101	9.33e-09	0.000699	0.001964	0.721885	129.775
ADHD	Serum 25-Hydroxyvitamin D levels	rs4966011	G	A	0.6183	-0.051904	0.0109	1.92e-06	-0.002041	0.002	0.307566	98.5223
ADHD	Serum 25-Hydroxyvitamin D levels	rs516890	C	T	0.4433	0.0483996	0.0104	3.26e-06	-0.001503	0.001978	0.447236	89.5703
ADHD	Serum 25-Hydroxyvitamin D levels	rs5996841	T	C	0.7346	-0.0523043	0.0116	6.51e-06	-0.003038	0.002137	0.155018	82.6322
ADHD	Serum 25-Hydroxyvitamin D levels	rs6082363	T	C	0.2942	0.0703	0.0101	3.39e-12	-0.004312	0.002146	0.0445061	159.142
ADHD	Serum 25-Hydroxyvitamin D levels	rs61894543	C	T	0.6879	-0.0527048	0.0114	3.78e-06	-0.002633	0.002076	0.204586	92.4053
ADHD	Serum 25-Hydroxyvitamin D levels	rs6520015	T	C	0.5308	0.0448013	0.0099	6.03e-06	-0.001926	0.002053	0.348155	77.4395
ADHD	Serum 25-Hydroxyvitamin D levels	rs6537401	G	A	0.6491	-0.0568032	0.01	1.34e-08	0.000413	0.002049	0.840136	113.904
ADHD	Serum 25-Hydroxyvitamin D levels	rs6684722	C	T	0.3151	-0.0462953	0.0099	2.92e-06	-0.000354	0.002045	0.862551	71.6489
ADHD	Serum 25-Hydroxyvitamin D levels	rs66968950	C	A	0.3956	0.0441987	0.0096	4.14e-06	0.000759	0.001996	0.703916	72.3543
ADHD	Serum 25-Hydroxyvitamin D levels	rs6757553	T	C	0.2614	0.0518047	0.0105	8.07e-07	0.001415	0.002199	0.519933	80.2715
ADHD	Serum 25-Hydroxyvitamin D levels	rs67679818	C	T	0.4533	0.0425996	0.0094	5.85e-06	0.001809	0.001983	0.361654	69.662
ADHD	Serum 25-Hydroxyvitamin D levels	rs705696	G	A	0.667	0.0452984	0.01	5.9e-06	0.002561	0.002041	0.209542	70.5976
ADHD	Serum 25-Hydroxyvitamin D levels	rs7100410	G	A	0.7465	-0.050399	0.0105	1.59e-06	-0.002147	0.002213	0.331953	74.4607
ADHD	Serum 25-Hydroxyvitamin D levels	rs71428363	G	A	0.8807	0.0787003	0.0157	5.37e-07	-0.003749	0.003239	0.24704	100.843
ADHD	Serum 25-Hydroxyvitamin D levels	rs724973	C	T	0.6789	0.0555955	0.0121	4.33e-06	-0.002255	0.002097	0.282141	104.417
ADHD	Serum 25-Hydroxyvitamin D levels	rs72663118	C	T	0.9125	-0.0854054	0.0164	1.91e-07	0.004405	0.003374	0.191666	90.2353
ADHD	Serum 25-Hydroxyvitamin D levels	rs72854462	A	G	0.7773	0.0627964	0.0107	4.39e-09	-0.003652	0.002249	0.10435	105.786
ADHD	Serum 25-Hydroxyvitamin D levels	rs72946217	A	C	0.8419	0.0605964	0.0129	2.64e-06	-0.003455	0.002665	0.194745	75.7128
ADHD	Serum 25-Hydroxyvitamin D levels	rs73007619	A	G	0.9831	-0.162095	0.0352	4.12e-06	0.005269	0.009015	0.558975	67.6183
ADHD	Serum 25-Hydroxyvitamin D levels	rs73163723	A	G	0.7495	0.0558036	0.0108	2.38e-07	-0.000348	0.002278	0.878583	90.588
ADHD	Serum 25-Hydroxyvitamin D levels	rs74714642	G	A	0.8012	-0.051904	0.0108	1.54e-06	-0.002627	0.00233	0.259516	66.4646
ADHD	Serum 25-Hydroxyvitamin D levels	rs74760947	A	G	0.9404	-0.0953992	0.0209	5.01e-06	0.008397	0.004589	0.0672527	79.0224
ADHD	Serum 25-Hydroxyvitamin D levels	rs7485057	T	C	0.2247	0.049999	0.0108	3.66e-06	0.005719	0.002296	0.012755	67.4578
ADHD	Serum 25-Hydroxyvitamin D levels	rs7500087	C	T	0.8141	-0.0698969	0.0151	3.68e-06	-0.000625	0.002566	0.807704	114.597
ADHD	Serum 25-Hydroxyvitamin D levels	rs7506904	G	A	0.3797	-0.0559039	0.0098	1.17e-08	-0.000311	0.002015	0.877285	114.084
ADHD	Serum 25-Hydroxyvitamin D levels	rs75069390	C	T	0.9851	0.201503	0.0441	4.9e-06	-0.014923	0.007891	0.058626	92.3436
ADHD	Serum 25-Hydroxyvitamin D levels	rs7534324	G	A	0.8539	-0.0669949	0.0133	4.72e-07	0.000179	0.002782	0.948741	86.7532
ADHD	Serum 25-Hydroxyvitamin D levels	rs7563362	A	G	0.1461	-0.0644959	0.0137	2.5e-06	0.00266	0.002791	0.340488	80.3953
ADHD	Serum 25-Hydroxyvitamin D levels	rs7608383	A	C	0.8897	-0.0598031	0.0129	3.55e-06	0.001197	0.003079	0.697357	54.3538
ADHD	Serum 25-Hydroxyvitamin D levels	rs76627874	A	G	0.9245	-0.0807004	0.0162	6.31e-07	-0.001318	0.003614	0.715366	70.414
ADHD	Serum 25-Hydroxyvitamin D levels	rs76696784	T	G	0.8062	-0.0494949	0.011	6.81e-06	-0.002796	0.002376	0.23933	59.2801
ADHD	Serum 25-Hydroxyvitamin D levels	rs76857496	C	A	0.8569	0.0800027	0.014	1.1e-08	-0.001148	0.002813	0.683199	121.652
ADHD	Serum 25-Hydroxyvitamin D levels	rs769267	G	A	0.3171	0.0452028	0.0097	3.16e-06	0.002386	0.002061	0.247052	68.5373
ADHD	Serum 25-Hydroxyvitamin D levels	rs77960	G	A	0.6839	-0.0732053	0.01	2.47e-13	-0.000343	0.00207	0.868356	179.708
ADHD	Serum 25-Hydroxyvitamin D levels	rs7819557	G	A	0.9583	-0.0966981	0.0214	6.22e-06	0.002741	0.00454	0.546119	57.8705
ADHD	Serum 25-Hydroxyvitamin D levels	rs7844069	T	G	0.3897	0.0551982	0.0095	6.23e-09	0.001082	0.00197	0.582825	112.308
ADHD	Serum 25-Hydroxyvitamin D levels	rs78648104	T	C	0.8827	0.0919956	0.0174	1.24e-07	-0.000108	0.003472	0.975133	135.852
ADHD	Serum 25-Hydroxyvitamin D levels	rs78909688	C	T	0.9254	-0.0785022	0.0174	6.43e-06	0.009498	0.003745	0.011237	65.8962
ADHD	Serum 25-Hydroxyvitamin D levels	rs79125067	G	A	0.9404	-0.0978003	0.019	2.64e-07	-0.002286	0.004154	0.58206	83.0546
ADHD	Serum 25-Hydroxyvitamin D levels	rs7938490	T	C	0.341	-0.0486022	0.0096	4.13e-07	0.001382	0.002006	0.490735	82.2378
ADHD	Serum 25-Hydroxyvitamin D levels	rs8016504	C	A	0.4543	-0.050704	0.0096	1.28e-07	0.005576	0.001967	0.00459103	98.7629
ADHD	Serum 25-Hydroxyvitamin D levels	rs8085882	A	G	0.507	0.0522983	0.0096	5.1e-08	-0.004313	0.001968	0.028459	105.946
ADHD	Serum 25-Hydroxyvitamin D levels	rs8089174	C	T	0.7087	-0.0465991	0.0105	9.08e-06	-0.004271	0.002211	0.0534208	69.4393
ADHD	Serum 25-Hydroxyvitamin D levels	rs8132107	G	A	0.4722	0.0454035	0.0094	1.36e-06	0.001946	0.001946	0.317379	79.5937
ADHD	Serum 25-Hydroxyvitamin D levels	rs9571014	C	T	0.9821	0.1582	0.0332	1.89e-06	0.00056	0.006797	0.934369	68.1492
ADHD	Serum 25-Hydroxyvitamin D levels	rs9574218	T	C	0.669	-0.0447986	0.0097	3.87e-06	0.001575	0.002044	0.440957	68.8381
ADHD	Serum 25-Hydroxyvitamin D levels	rs9818469	C	T	0.5209	-0.046201	0.0093	6.77e-07	-0.001481	0.001945	0.446506	82.5288
ADHD	Serum 25-Hydroxyvitamin D levels	rs9840386	C	T	0.5179	0.0423025	0.0094	6.79e-06	0.003015	0.001954	0.122742	69.2089
ADHD	Serum 25-Hydroxyvitamin D levels	rs9902312	T	C	0.6541	-0.0471964	0.0099	1.87e-06	-0.003306	0.002094	0.11436	78.0746
ADHD	Serum 25-Hydroxyvitamin D levels	rs9969232	G	A	0.3936	-0.0683003	0.01	8.49e-12	-0.000234	0.002041	0.908682	172.697
ADHD	Serum 25-Hydroxyvitamin D levels	rs9984627	G	A	0.6272	-0.0513038	0.0097	1.23e-07	0.003126	0.002059	0.129056	95.3619
ADHD	calcium	rs10177879	C	T	0.9702	-0.132001	0.0292	6.17e-06	-0.0077076	0.0073653	0.29534	78.0422
ADHD	calcium	rs10430636	G	A	0.6879	-0.0488962	0.01	1.01e-06	0.0011291	0.0027057	0.67646	79.5195
ADHD	calcium	rs10795678	C	T	0.4115	0.0533038	0.0097	3.9e-08	0.0048318	0.0025497	0.0580925	106.632
ADHD	calcium	rs10810147	G	A	0.6233	0.0481995	0.0094	2.93e-07	0.00010654	0.0025289	0.9664	84.5105
ADHD	calcium	rs10875612	C	T	0.4583	-0.0542978	0.0093	5.27e-09	0.0058878	0.0024899	0.0180451	113.441
ADHD	calcium	rs10965176	G	T	0.8131	0.0619978	0.0114	5.38e-08	-0.0027378	0.0031343	0.38239	90.5049
ADHD	calcium	rs11121053	G	A	0.4056	0.0434043	0.0098	9.47e-06	-0.00096051	0.002531	0.70432	70.355
ADHD	calcium	rs112741090	G	T	0.9423	0.0908	0.019	1.76e-06	-0.00037247	0.0050339	0.94102	69.4361
ADHD	calcium	rs115111850	A	G	0.9523	-0.114895	0.0204	1.78e-08	-0.0093426	0.0052262	0.0738346	92.9121
ADHD	calcium	rs11552464	T	G	0.8151	-0.0620988	0.0127	1.01e-06	0.0021558	0.0033609	0.52125	90.0489
ADHD	calcium	rs115607392	T	C	0.9751	-0.131305	0.0287	4.76e-06	0.0031089	0.0073203	0.671059	64.8389
ADHD	calcium	rs11596214	G	A	0.5596	0.0528012	0.0095	2.73e-08	0.00075874	0.0025556	0.766549	106.48
ADHD	calcium	rs1162202	C	T	0.6004	0.0613961	0.0102	1.75e-09	0.00015754	0.0025907	0.95151	140.214
ADHD	calcium	rs12218778	G	A	0.8072	-0.0530949	0.0119	8.13e-06	0.003652	0.0032528	0.26156	67.957
ADHD	calcium	rs12298657	C	T	0.7654	0.0509973	0.011	3.55e-06	-0.0036986	0.0028661	0.19689	72.3393
ADHD	calcium	rs1246268	T	G	0.3111	-0.050399	0.01	4.66e-07	0.0055774	0.0026539	0.0355926	84.3395
ADHD	calcium	rs12819667	C	T	0.4433	0.0556996	0.0093	2.11e-09	0.0054043	0.0024908	0.030031	118.672
ADHD	calcium	rs12952581	G	A	0.6342	-0.0440982	0.0096	4.36e-06	-0.0049509	0.0025826	0.0552357	69.8815
ADHD	calcium	rs13163845	T	C	0.8479	0.0708032	0.0138	2.89e-07	0.0019611	0.0035424	0.57984	100.185
ADHD	calcium	rs13172973	G	A	0.6889	0.047103	0.0103	4.81e-06	0.0025773	0.0027483	0.34835	73.659
ADHD	calcium	rs13176429	T	C	0.337	-0.0523043	0.0099	1.27e-07	0.0065818	0.0026729	0.0138019	94.7128
ADHD	calcium	rs1335762	T	C	0.5736	-0.0440982	0.0096	4.36e-06	-0.0051579	0.002513	0.0401236	73.6783
ADHD	calcium	rs1336187	G	A	0.5209	-0.0458031	0.0095	1.43e-06	-0.0039498	0.0025154	0.11636	81.1119
ADHD	calcium	rs13387644	G	A	0.5378	-0.0486967	0.0093	1.64e-07	0.0022712	0.0024988	0.36339	91.3314
ADHD	calcium	rs1343667	C	T	0.4284	0.0555955	0.0107	2.04e-07	0.0017664	0.0025029	0.48036	117.311
ADHD	calcium	rs1387671	T	G	0.495	0.0458048	0.0094	1.1e-06	-0.0027271	0.002494	0.27419	81.2517
ADHD	calcium	rs1431771	C	T	0.4433	-0.0473013	0.0107	9.84e-06	0.0032758	0.0024948	0.18917	85.5467
ADHD	calcium	rs145969813	C	A	0.9274	-0.0996988	0.021	2.06e-06	-0.007992	0.0046	0.082319	103.711
ADHD	calcium	rs150658015	T	C	0.9742	0.119604	0.0251	1.89e-06	0.011581	0.0076392	0.12952	55.6836
ADHD	calcium	rs1686469	A	G	0.3459	-0.0478046	0.01	1.75e-06	-0.00033682	0.0026962	0.90058	80.1019
ADHD	calcium	rs17015512	T	C	0.66	-0.0494949	0.0097	3.35e-07	0.0013863	0.0025506	0.58677	85.1688
ADHD	calcium	rs17017439	C	T	0.7058	0.0479994	0.0099	1.24e-06	0.0022876	0.00262	0.38259	74.1088
ADHD	calcium	rs17597578	T	C	0.8708	0.0803996	0.0155	2.14e-07	0.0032227	0.0039447	0.41394	112.714
ADHD	calcium	rs1760892	T	C	0.2485	-0.0505041	0.0111	5.37e-06	0.0029583	0.0028791	0.30418	73.7873
ADHD	calcium	rs17718444	C	T	0.6481	0.0611986	0.0103	2.82e-09	-0.0020527	0.0026652	0.44119	132.417
ADHD	calcium	rs17758391	G	A	0.6909	0.0544977	0.0105	2.1e-07	0.0023394	0.002688	0.38412	98.2833
ADHD	calcium	rs2025286	A	C	0.5437	-0.0548998	0.0093	3.57e-09	-0.0032097	0.0025942	0.21599	115.894
ADHD	calcium	rs2063640	C	A	0.9056	0.0894019	0.0202	9.61e-06	-0.00072167	0.0041963	0.86346	105.89
ADHD	calcium	rs2107099	G	A	0.5427	-0.0490012	0.0095	2.5e-07	-0.0020466	0.0025202	0.41674	92.3317
ADHD	calcium	rs247816	T	C	0.2942	-0.0618967	0.0136	5.33e-06	-0.0032644	0.0027218	0.2304	123.313
ADHD	calcium	rs2582895	C	A	0.6173	0.0724974	0.0096	4.29e-14	0.0036672	0.0025518	0.15069	192.636
ADHD	calcium	rs263152	C	T	0.673	-0.0475005	0.0102	3.21e-06	-0.00021762	0.0027336	0.93655	76.9218
ADHD	calcium	rs2651569	T	C	0.4483	0.0465973	0.0094	7.15e-07	0.0038653	0.002502	0.12238	83.1991
ADHD	calcium	rs281297	T	C	0.6223	-0.0513986	0.0098	1.56e-07	-0.0016253	0.0025943	0.53101	96.216
ADHD	calcium	rs2838762	A	C	0.4225	0.043701	0.0096	5.31e-06	0.0004689	0.0025115	0.8519	72.1815
ADHD	calcium	rs28694634	G	A	0.3569	-0.0553964	0.0105	1.32e-07	0.0058141	0.0026806	0.0300829	109.159
ADHD	calcium	rs2886697	G	A	0.6521	0.0587971	0.0096	9.09e-10	0.00081772	0.0025741	0.75073	121.568
ADHD	calcium	rs2933195	A	G	0.5467	-0.0423962	0.0094	6.48e-06	-0.00060166	0.0024876	0.80888	68.9975
ADHD	calcium	rs3001723	G	A	0.674	-0.0788051	0.0102	1.11e-14	-0.0028613	0.002704	0.28997	211.754
ADHD	calcium	rs3098651	T	C	0.2525	0.0505981	0.0112	6.25e-06	0.0016744	0.0028648	0.55889	74.8547
ADHD	calcium	rs34012672	C	T	0.8718	0.0656005	0.0137	1.68e-06	-0.0047727	0.0034976	0.17239	74.5067
ADHD	calcium	rs35207123	A	C	0.8062	-0.0559039	0.0119	2.63e-06	-0.0006225	0.0032325	0.84729	75.6422
ADHD	calcium	rs3782470	T	C	0.1034	-0.0720977	0.0153	2.45e-06	0.0041995	0.0040054	0.29443	74.6517
ADHD	calcium	rs3810414	T	C	0.7177	0.0515008	0.0105	9.35e-07	0.0017074	0.0027932	0.54102	83.2544
ADHD	calcium	rs40071	T	C	0.8072	0.0683033	0.0142	1.51e-06	0.006605	0.0032391	0.0414362	112.528
ADHD	calcium	rs4613308	T	C	0.4881	-0.0507987	0.0106	1.65e-06	-0.0014444	0.0024822	0.56063	99.9121
ADHD	calcium	rs4684906	A	G	0.6899	0.0452984	0.0099	4.75e-06	0.0019059	0.0026737	0.47594	67.9975
ADHD	calcium	rs4773306	G	A	0.4503	-0.0423023	0.0095	8.47e-06	0.0020318	0.002489	0.41432	68.6117
ADHD	calcium	rs4884	A	G	0.3091	-0.052199	0.0105	6.65e-07	0.0069469	0.0027413	0.011272	90.1576
ADHD	calcium	rs4916723	A	C	0.5865	-0.0852965	0.011	8.89e-15	-0.0045281	0.0025376	0.0743584	274.031
ADHD	calcium	rs4925811	T	G	0.5338	-0.0579999	0.0101	9.33e-09	-0.0042479	0.0024854	0.0874239	129.775
ADHD	calcium	rs4966011	G	A	0.6183	-0.051904	0.0109	1.92e-06	-0.0077048	0.0025394	0.00241313	98.5223
ADHD	calcium	rs516890	C	T	0.4433	0.0483996	0.0104	3.26e-06	0.004378	0.0025137	0.081568	89.5703
ADHD	calcium	rs5996841	T	C	0.7346	-0.0523043	0.0116	6.51e-06	0.001145	0.0027275	0.67462	82.6322
ADHD	calcium	rs6082363	T	C	0.2942	0.0703	0.0101	3.39e-12	0.0062149	0.0027368	0.0231547	159.142
ADHD	calcium	rs61894543	C	T	0.6879	-0.0527048	0.0114	3.78e-06	-0.0012554	0.0026603	0.636999	92.4053
ADHD	calcium	rs6520015	T	C	0.5308	0.0448013	0.0099	6.03e-06	0.0036964	0.0025882	0.15324	77.4395
ADHD	calcium	rs6537401	G	A	0.6491	-0.0568032	0.01	1.34e-08	-0.0049296	0.0026279	0.0606764	113.904
ADHD	calcium	rs6684722	C	T	0.3151	-0.0462953	0.0099	2.92e-06	-0.005545	0.0026159	0.0340259	71.6489
ADHD	calcium	rs66968950	C	A	0.3956	0.0441987	0.0096	4.14e-06	-0.00077926	0.0025637	0.76116	72.3543
ADHD	calcium	rs6757553	T	C	0.2614	0.0518047	0.0105	8.07e-07	0.0032401	0.0028107	0.24899	80.2715
ADHD	calcium	rs67679818	C	T	0.4533	0.0425996	0.0094	5.85e-06	-0.00030475	0.0025338	0.90427	69.662
ADHD	calcium	rs705696	G	A	0.667	0.0452984	0.01	5.9e-06	0.0029184	0.0026057	0.26271	70.5976
ADHD	calcium	rs7100410	G	A	0.7465	-0.050399	0.0105	1.59e-06	0.0040417	0.0027837	0.14652	74.4607
ADHD	calcium	rs7119	C	T	0.5895	-0.0423962	0.0094	6.48e-06	-0.0013668	0.0024972	0.58414	67.3731
ADHD	calcium	rs71428363	G	A	0.8807	0.0787003	0.0157	5.37e-07	-0.0051662	0.0041247	0.21039	100.843
ADHD	calcium	rs724973	C	T	0.6789	0.0555955	0.0121	4.33e-06	-0.0032758	0.0026743	0.22061	104.417
ADHD	calcium	rs72663118	C	T	0.9125	-0.0854054	0.0164	1.91e-07	0.002724	0.0042884	0.52531	90.2353
ADHD	calcium	rs72854462	A	G	0.7773	0.0627964	0.0107	4.39e-09	-0.0008144	0.002879	0.77727	105.786
ADHD	calcium	rs72946217	A	C	0.8419	0.0605964	0.0129	2.64e-06	-0.00010853	0.0034135	0.97464	75.7128
ADHD	calcium	rs73007619	A	G	0.9831	-0.162095	0.0352	4.12e-06	0.0058865	0.011529	0.60963	67.6183
ADHD	calcium	rs73163723	A	G	0.7495	0.0558036	0.0108	2.38e-07	0.0055081	0.0029103	0.0584063	90.588
ADHD	calcium	rs74714642	G	A	0.8012	-0.051904	0.0108	1.54e-06	-0.0032333	0.0029879	0.27918	66.4646
ADHD	calcium	rs74760947	A	G	0.9404	-0.0953992	0.0209	5.01e-06	0.0082497	0.0058222	0.1565	79.0224
ADHD	calcium	rs7485057	T	C	0.2247	0.049999	0.0108	3.66e-06	-0.0034652	0.0029333	0.23747	67.4578
ADHD	calcium	rs7500087	C	T	0.8141	-0.0698969	0.0151	3.68e-06	-0.006491	0.0032509	0.0458627	114.597
ADHD	calcium	rs7506904	G	A	0.3797	-0.0559039	0.0098	1.17e-08	0.0018169	0.0025682	0.47927	114.084
ADHD	calcium	rs75069390	C	T	0.9851	0.201503	0.0441	4.9e-06	0.0054979	0.0099699	0.58133	92.3436
ADHD	calcium	rs7563362	A	G	0.1461	-0.0644959	0.0137	2.5e-06	0.0058847	0.0035655	0.0988485	80.3953
ADHD	calcium	rs7608383	A	C	0.8897	-0.0598031	0.0129	3.55e-06	-0.0035278	0.0039469	0.37141	54.3538
ADHD	calcium	rs7613360	C	T	0.6163	-0.0534008	0.0097	3.69e-08	-0.0022627	0.0025337	0.37183	104.502
ADHD	calcium	rs76627874	A	G	0.9245	-0.0807004	0.0162	6.31e-07	-0.0053109	0.00463	0.25136	70.414
ADHD	calcium	rs76696784	T	G	0.8062	-0.0494949	0.011	6.81e-06	0.0042687	0.0030396	0.1602	59.2801
ADHD	calcium	rs76857496	C	A	0.8569	0.0800027	0.014	1.1e-08	-0.00099917	0.0035839	0.7804	121.652
ADHD	calcium	rs77960	G	A	0.6839	-0.0732053	0.01	2.47e-13	0.0026295	0.0026428	0.31976	179.708
ADHD	calcium	rs7819557	G	A	0.9583	-0.0966981	0.0214	6.22e-06	0.0014628	0.0057552	0.79936	57.8705
ADHD	calcium	rs7844069	T	G	0.3897	0.0551982	0.0095	6.23e-09	-0.0033307	0.0025165	0.18565	112.308
ADHD	calcium	rs78648104	T	C	0.8827	0.0919956	0.0174	1.24e-07	-0.0010483	0.0044282	0.81286	135.852
ADHD	calcium	rs78909688	C	T	0.9254	-0.0785022	0.0174	6.43e-06	0.00012519	0.0047907	0.97915	65.8962
ADHD	calcium	rs79125067	G	A	0.9404	-0.0978003	0.019	2.64e-07	0.0099561	0.0052867	0.0596664	83.0546
ADHD	calcium	rs7938490	T	C	0.341	-0.0486022	0.0096	4.13e-07	-0.00032743	0.002573	0.89874	82.2378
ADHD	calcium	rs8016504	C	A	0.4543	-0.050704	0.0096	1.28e-07	0.0035609	0.0025076	0.15561	98.7629
ADHD	calcium	rs8085882	A	G	0.507	0.0522983	0.0096	5.1e-08	-0.00078429	0.0025006	0.7538	105.946
ADHD	calcium	rs8089174	C	T	0.7087	-0.0465991	0.0105	9.08e-06	-0.00057766	0.0028251	0.83798	69.4393
ADHD	calcium	rs8132107	G	A	0.4722	0.0454035	0.0094	1.36e-06	0.0010983	0.0024812	0.65802	79.5937
ADHD	calcium	rs9571014	C	T	0.9821	0.1582	0.0332	1.89e-06	0.013314	0.0086996	0.12591	68.1492
ADHD	calcium	rs9574218	T	C	0.669	-0.0447986	0.0097	3.87e-06	-0.00019073	0.0026121	0.94179	68.8381
ADHD	calcium	rs9818469	C	T	0.5209	-0.046201	0.0093	6.77e-07	-0.0049197	0.0024872	0.0479314	82.5288
ADHD	calcium	rs9840386	C	T	0.5179	0.0423025	0.0094	6.79e-06	-0.0010102	0.0024885	0.68477	69.2089
ADHD	calcium	rs9902312	T	C	0.6541	-0.0471964	0.0099	1.87e-06	-0.0032609	0.0026651	0.22112	78.0746
ADHD	calcium	rs9969232	G	A	0.3936	-0.0683003	0.01	8.49e-12	-0.00047628	0.0026111	0.85526	172.697
ADHD	calcium	rs9984627	G	A	0.6272	-0.0513038	0.0097	1.23e-07	-0.0021508	0.0025968	0.40752	95.3619
ADHD	fibroblast growth factor 23	rs10177879	C	T	0.9702	-0.132001	0.0292	6.16684e-06	-0.026	0.0341	0.4452	78.0422
ADHD	fibroblast growth factor 23	rs10430636	G	A	0.6879	-0.0488962	0.01	1.01032e-06	-0.0047	0.0125	0.709099	79.5195
ADHD	fibroblast growth factor 23	rs10795678	C	T	0.4115	0.0533038	0.0097	3.90192e-08	0.0109	0.0107	0.3098	106.632
ADHD	fibroblast growth factor 23	rs10810147	G	A	0.6233	0.0481995	0.0094	2.93447e-07	-0.0059	0.0105	0.5754	84.5105
ADHD	fibroblast growth factor 23	rs10875612	C	T	0.4583	-0.0542978	0.0093	5.26813e-09	0.0088	0.0106	0.407	113.441
ADHD	fibroblast growth factor 23	rs10965176	G	T	0.8131	0.0619978	0.0114	5.37602e-08	0.0074	0.0143	0.6046	90.5049
ADHD	fibroblast growth factor 23	rs11121053	G	A	0.4056	0.0434043	0.0098	9.46684e-06	0.0075	0.0115	0.5134	70.355
ADHD	fibroblast growth factor 23	rs112741090	G	T	0.9423	0.0908	0.019	1.76214e-06	-0.0116	0.0222	0.6006	69.4361
ADHD	fibroblast growth factor 23	rs115111850	A	G	0.9523	-0.114895	0.0204	1.78035e-08	0.033	0.0226	0.1446	92.9121
ADHD	fibroblast growth factor 23	rs11552464	T	G	0.8151	-0.0620988	0.0127	1.01004e-06	0.0113	0.0145	0.4344	90.0489
ADHD	fibroblast growth factor 23	rs115607392	T	C	0.9751	-0.131305	0.0287	4.75998e-06	-0.0341	0.0369	0.3558	64.8389
ADHD	fibroblast growth factor 23	rs11596214	G	A	0.5596	0.0528012	0.0095	2.72858e-08	0.0169	0.0111	0.1264	106.48
ADHD	fibroblast growth factor 23	rs1162202	C	T	0.6004	0.0613961	0.0102	1.75255e-09	-0.0155	0.012	0.1985	140.214
ADHD	fibroblast growth factor 23	rs11649759	T	C	0.9672	-0.128004	0.0249	2.73693e-07	-0.0019	0.032	0.9525	80.5279
ADHD	fibroblast growth factor 23	rs12218778	G	A	0.8072	-0.0530949	0.0119	8.12901e-06	0.0021	0.0133	0.8766	67.957
ADHD	fibroblast growth factor 23	rs12298657	C	T	0.7654	0.0509973	0.011	3.55021e-06	-0.012	0.0132	0.366	72.3393
ADHD	fibroblast growth factor 23	rs1246268	T	G	0.3111	-0.050399	0.01	4.65785e-07	-0.0052	0.0116	0.6531	84.3395
ADHD	fibroblast growth factor 23	rs12819667	C	T	0.4433	0.0556996	0.0093	2.10874e-09	0.0006	0.0105	0.9517	118.672
ADHD	fibroblast growth factor 23	rs12952581	G	A	0.6342	-0.0440982	0.0096	4.35745e-06	0.0097	0.0108	0.3685	69.8815
ADHD	fibroblast growth factor 23	rs13099657	G	A	0.8211	-0.0523043	0.0113	3.67965e-06	-0.0336	0.0131	0.01027	62.2429
ADHD	fibroblast growth factor 23	rs13163845	T	C	0.8479	0.0708032	0.0138	2.88714e-07	0.0308	0.0164	0.0615106	100.185
ADHD	fibroblast growth factor 23	rs13172973	G	A	0.6889	0.047103	0.0103	4.80539e-06	-0.0036	0.0116	0.7527	73.659
ADHD	fibroblast growth factor 23	rs13176429	T	C	0.337	-0.0523043	0.0099	1.26901e-07	0.0102	0.0116	0.3811	94.7128
ADHD	fibroblast growth factor 23	rs1335762	T	C	0.5736	-0.0440982	0.0096	4.35745e-06	0.013	0.0103	0.2073	73.6783
ADHD	fibroblast growth factor 23	rs1336187	G	A	0.5209	-0.0458031	0.0095	1.42567e-06	0.0015	0.011	0.8912	81.1119
ADHD	fibroblast growth factor 23	rs13387644	G	A	0.5378	-0.0486967	0.0093	1.63916e-07	0.0075	0.0113	0.5098	91.3314
ADHD	fibroblast growth factor 23	rs1343667	C	T	0.4284	0.0555955	0.0107	2.03794e-07	0.0065	0.0104	0.534101	117.311
ADHD	fibroblast growth factor 23	rs1387671	T	G	0.495	0.0458048	0.0094	1.10002e-06	0.0245	0.0105	0.0202899	81.2517
ADHD	fibroblast growth factor 23	rs139950543	G	A	0.9871	-0.189999	0.0398	1.80743e-06	0.0081	0.0522	0.8769	71.2052
ADHD	fibroblast growth factor 23	rs1431771	C	T	0.4433	-0.0473013	0.0107	9.83909e-06	0.0163	0.0105	0.1217	85.5467
ADHD	fibroblast growth factor 23	rs145969813	C	A	0.9274	-0.0996988	0.021	2.05884e-06	0.0121	0.0251	0.6296	103.711
ADHD	fibroblast growth factor 23	rs150658015	T	C	0.9742	0.119604	0.0251	1.88775e-06	-0.0155	0.0328	0.6368	55.6836
ADHD	fibroblast growth factor 23	rs1686469	A	G	0.3459	-0.0478046	0.01	1.7489e-06	0.0157	0.0113	0.1631	80.1019
ADHD	fibroblast growth factor 23	rs17015512	T	C	0.66	-0.0494949	0.0097	3.35075e-07	0.0077	0.0106	0.4697	85.1688
ADHD	fibroblast growth factor 23	rs17017439	C	T	0.7058	0.0479994	0.0099	1.24448e-06	-0.0064	0.0114	0.5728	74.1088
ADHD	fibroblast growth factor 23	rs17597578	T	C	0.8708	0.0803996	0.0155	2.1363e-07	-0.0085	0.018	0.635501	112.714
ADHD	fibroblast growth factor 23	rs1760892	T	C	0.2485	-0.0505041	0.0111	5.36659e-06	0.0101	0.0119	0.3967	73.7873
ADHD	fibroblast growth factor 23	rs17718444	C	T	0.6481	0.0611986	0.0103	2.82238e-09	0.0162	0.0113	0.1527	132.417
ADHD	fibroblast growth factor 23	rs17758391	G	A	0.6909	0.0544977	0.0105	2.10009e-07	0.0077	0.012	0.524901	98.2833
ADHD	fibroblast growth factor 23	rs1790087	T	C	0.2247	-0.0555973	0.0114	1.07736e-06	0.0024	0.0126	0.8483	83.427
ADHD	fibroblast growth factor 23	rs1791785	C	T	0.7485	-0.0515038	0.0106	1.18068e-06	-0.0008	0.0118	0.9446	77.3574
ADHD	fibroblast growth factor 23	rs2025286	A	C	0.5437	-0.0548998	0.0093	3.56511e-09	-0.0011	0.011	0.9236	115.894
ADHD	fibroblast growth factor 23	rs2063640	C	A	0.9056	0.0894019	0.0202	9.60703e-06	-0.0247	0.0178	0.1649	105.89
ADHD	fibroblast growth factor 23	rs2107099	G	A	0.5427	-0.0490012	0.0095	2.49575e-07	0.0228	0.0113	0.0440099	92.3317
ADHD	fibroblast growth factor 23	rs2153168	C	T	0.8091	0.0639039	0.0138	3.64395e-06	-0.0046	0.0169	0.7837	97.7396
ADHD	fibroblast growth factor 23	rs247816	T	C	0.2942	-0.0618967	0.0136	5.33341e-06	0.014	0.0132	0.2884	123.313
ADHD	fibroblast growth factor 23	rs2582895	C	A	0.6173	0.0724974	0.0096	4.29246e-14	-0.0041	0.011	0.7067	192.636
ADHD	fibroblast growth factor 23	rs263152	C	T	0.673	-0.0475005	0.0102	3.20989e-06	0.0066	0.0118	0.5733	76.9218
ADHD	fibroblast growth factor 23	rs2651569	T	C	0.4483	0.0465973	0.0094	7.15318e-07	-0.0085	0.0116	0.4633	83.1991
ADHD	fibroblast growth factor 23	rs281297	T	C	0.6223	-0.0513986	0.0098	1.56493e-07	0.0025	0.0114	0.8265	96.216
ADHD	fibroblast growth factor 23	rs283469	G	T	0.7137	-0.0538967	0.0112	1.49275e-06	0.0015	0.0112	0.8938	91.9678
ADHD	fibroblast growth factor 23	rs2838762	A	C	0.4225	0.043701	0.0096	5.30898e-06	0.0129	0.0106	0.2244	72.1815
ADHD	fibroblast growth factor 23	rs28694634	G	A	0.3569	-0.0553964	0.0105	1.32141e-07	-0.0019	0.0117	0.869	109.159
ADHD	fibroblast growth factor 23	rs2886697	G	A	0.6521	0.0587971	0.0096	9.08576e-10	0.0151	0.0105	0.1525	121.568
ADHD	fibroblast growth factor 23	rs2933195	A	G	0.5467	-0.0423961	0.0094	6.47578e-06	0.0009	0.0107	0.9338	68.9975
ADHD	fibroblast growth factor 23	rs3001723	G	A	0.674	-0.0788051	0.0102	1.10984e-14	-0.0195	0.0111	0.0782799	211.754
ADHD	fibroblast growth factor 23	rs3098651	T	C	0.2525	0.0505981	0.0112	6.25199e-06	0.0041	0.0138	0.763901	74.8547
ADHD	fibroblast growth factor 23	rs34008721	T	C	0.6203	-0.0511038	0.0095	7.47547e-08	-0.002	0.0105	0.8485	95.3109
ADHD	fibroblast growth factor 23	rs34012672	C	T	0.8718	0.0656005	0.0137	1.68154e-06	-0.0132	0.0163	0.4163	74.5067
ADHD	fibroblast growth factor 23	rs35207123	A	C	0.8062	-0.0559039	0.0119	2.62969e-06	-0.0113	0.0135	0.4045	75.6422
ADHD	fibroblast growth factor 23	rs3782470	T	C	0.1034	-0.0720977	0.0153	2.44976e-06	-0.0027	0.0177	0.8805	74.6517
ADHD	fibroblast growth factor 23	rs3810414	T	C	0.7177	0.0515008	0.0105	9.35057e-07	0.0238	0.0117	0.0415203	83.2544
ADHD	fibroblast growth factor 23	rs40071	T	C	0.8072	0.0683033	0.0142	1.50861e-06	0.0059	0.0128	0.6466	112.528
ADHD	fibroblast growth factor 23	rs4613308	T	C	0.4881	-0.0507987	0.0106	1.64857e-06	0.0061	0.0107	0.568801	99.9121
ADHD	fibroblast growth factor 23	rs4684906	A	G	0.6899	0.0452984	0.0099	4.74875e-06	-0.0093	0.0114	0.4117	67.9975
ADHD	fibroblast growth factor 23	rs4773306	G	A	0.4503	-0.0423023	0.0095	8.47304e-06	0.0033	0.0107	0.757801	68.6117
ADHD	fibroblast growth factor 23	rs4884	A	G	0.3091	-0.052199	0.0105	6.64951e-07	0.0215	0.0117	0.0652905	90.1576
ADHD	fibroblast growth factor 23	rs4916723	A	C	0.5865	-0.0852965	0.011	8.8884e-15	-0.011	0.0113	0.3309	274.031
ADHD	fibroblast growth factor 23	rs4925811	T	G	0.5338	-0.0579999	0.0101	9.3251e-09	0.0038	0.011	0.7286	129.775
ADHD	fibroblast growth factor 23	rs4966011	G	A	0.6183	-0.051904	0.0109	1.9184e-06	-0.0157	0.0104	0.134	98.5223
ADHD	fibroblast growth factor 23	rs516890	C	T	0.4433	0.0483996	0.0104	3.25859e-06	0.0091	0.0119	0.4451	89.5703
ADHD	fibroblast growth factor 23	rs5996841	T	C	0.7346	-0.0523043	0.0116	6.51357e-06	0.0068	0.0113	0.548399	82.6322
ADHD	fibroblast growth factor 23	rs6082363	T	C	0.2942	0.0703	0.0101	3.39313e-12	0.0134	0.012	0.2621	159.142
ADHD	fibroblast growth factor 23	rs61894543	C	T	0.6879	-0.0527048	0.0114	3.77811e-06	0.0015	0.011	0.8903	92.4053
ADHD	fibroblast growth factor 23	rs6520015	T	C	0.5308	0.0448013	0.0099	6.02869e-06	0.0094	0.0108	0.3863	77.4395
ADHD	fibroblast growth factor 23	rs6537401	G	A	0.6491	-0.0568032	0.01	1.34444e-08	0.0007	0.012	0.9545	113.904
ADHD	fibroblast growth factor 23	rs6684722	C	T	0.3151	-0.0462953	0.0099	2.9211e-06	-0.0133	0.0119	0.2618	71.6489
ADHD	fibroblast growth factor 23	rs66968950	C	A	0.3956	0.0441987	0.0096	4.14393e-06	0.0034	0.0109	0.7527	72.3543
ADHD	fibroblast growth factor 23	rs6757553	T	C	0.2614	0.0518047	0.0105	8.06543e-07	-0.0045	0.0121	0.709601	80.2715
ADHD	fibroblast growth factor 23	rs67679818	C	T	0.4533	0.0425996	0.0094	5.84628e-06	0.0023	0.0115	0.8416	69.662
ADHD	fibroblast growth factor 23	rs705696	G	A	0.667	0.0452984	0.01	5.90295e-06	0.0067	0.0109	0.5383	70.5976
ADHD	fibroblast growth factor 23	rs7100410	G	A	0.7465	-0.050399	0.0105	1.58744e-06	0.0005	0.0121	0.969	74.4607
ADHD	fibroblast growth factor 23	rs7119	C	T	0.5895	-0.0423961	0.0094	6.47578e-06	-0.0068	0.0104	0.5155	67.3731
ADHD	fibroblast growth factor 23	rs71428363	G	A	0.8807	0.0787003	0.0157	5.36559e-07	-0.0004	0.0188	0.9836	100.843
ADHD	fibroblast growth factor 23	rs724973	C	T	0.6789	0.0555955	0.0121	4.33431e-06	0.0169	0.0125	0.176	104.417
ADHD	fibroblast growth factor 23	rs72663118	C	T	0.9125	-0.0854054	0.0164	1.91251e-07	0.0309	0.0211	0.143	90.2353
ADHD	fibroblast growth factor 23	rs72854462	A	G	0.7773	0.0627964	0.0107	4.38906e-09	-0.002	0.0118	0.8669	105.786
ADHD	fibroblast growth factor 23	rs72946217	A	C	0.8419	0.0605964	0.0129	2.63502e-06	-0.0258	0.0151	0.0881901	75.7128
ADHD	fibroblast growth factor 23	rs73007619	A	G	0.9831	-0.162095	0.0352	4.12495e-06	-0.0845	0.0452	0.0615304	67.6183
ADHD	fibroblast growth factor 23	rs73163723	A	G	0.7495	0.0558036	0.0108	2.3788e-07	-0.025	0.0125	0.0463596	90.588
ADHD	fibroblast growth factor 23	rs74714642	G	A	0.8012	-0.051904	0.0108	1.54036e-06	-0.0079	0.0126	0.5322	66.4646
ADHD	fibroblast growth factor 23	rs74760947	A	G	0.9404	-0.0953992	0.0209	5.00557e-06	-0.0047	0.0263	0.8575	79.0224
ADHD	fibroblast growth factor 23	rs7485057	T	C	0.2247	0.049999	0.0108	3.66491e-06	-0.0171	0.012	0.1532	67.4578
ADHD	fibroblast growth factor 23	rs7500087	C	T	0.8141	-0.0698969	0.0151	3.67559e-06	-0.026	0.0147	0.0764504	114.597
ADHD	fibroblast growth factor 23	rs7506904	G	A	0.3797	-0.0559039	0.0098	1.16699e-08	-0.0016	0.0116	0.8903	114.084
ADHD	fibroblast growth factor 23	rs75069390	C	T	0.9851	0.201503	0.0441	4.89518e-06	-0.0146	0.0454	0.747001	92.3436
ADHD	fibroblast growth factor 23	rs7534324	G	A	0.8539	-0.0669949	0.0133	4.72371e-07	0.0018	0.0161	0.9091	86.7532
ADHD	fibroblast growth factor 23	rs7563362	A	G	0.1461	-0.0644959	0.0137	2.50495e-06	-0.0257	0.0144	0.0750205	80.3953
ADHD	fibroblast growth factor 23	rs7608383	A	C	0.8897	-0.0598031	0.0129	3.55391e-06	-0.0104	0.0158	0.5082	54.3538
ADHD	fibroblast growth factor 23	rs7613360	C	T	0.6163	-0.0534008	0.0097	3.68677e-08	0.011	0.0106	0.3024	104.502
ADHD	fibroblast growth factor 23	rs76627874	A	G	0.9245	-0.0807004	0.0162	6.30908e-07	-0.0119	0.0195	0.5392	70.414
ADHD	fibroblast growth factor 23	rs76696784	T	G	0.8062	-0.0494949	0.011	6.81015e-06	0.0091	0.013	0.4846	59.2801
ADHD	fibroblast growth factor 23	rs76857496	C	A	0.8569	0.0800027	0.014	1.10041e-08	-0.0289	0.0165	0.0803101	121.652
ADHD	fibroblast growth factor 23	rs769267	G	A	0.3171	0.0452028	0.0097	3.16085e-06	0.0074	0.0111	0.5068	68.5373
ADHD	fibroblast growth factor 23	rs77960	G	A	0.6839	-0.0732053	0.01	2.46993e-13	-0.0145	0.011	0.1879	179.708
ADHD	fibroblast growth factor 23	rs7819557	G	A	0.9583	-0.0966981	0.0214	6.22485e-06	0.0066	0.0263	0.8012	57.8705
ADHD	fibroblast growth factor 23	rs7844069	T	G	0.3897	0.0551982	0.0095	6.23488e-09	-0.0102	0.0114	0.3697	112.308
ADHD	fibroblast growth factor 23	rs78648104	T	C	0.8827	0.0919956	0.0174	1.24268e-07	0.0102	0.0174	0.5574	135.852
ADHD	fibroblast growth factor 23	rs78909688	C	T	0.9254	-0.0785022	0.0174	6.43337e-06	-0.0067	0.0214	0.7545	65.8962
ADHD	fibroblast growth factor 23	rs79125067	G	A	0.9404	-0.0978003	0.019	2.64146e-07	-0.0333	0.0232	0.1516	83.0546
ADHD	fibroblast growth factor 23	rs7938490	T	C	0.341	-0.0486022	0.0096	4.13301e-07	0.0061	0.0113	0.588	82.2378
ADHD	fibroblast growth factor 23	rs8016504	C	A	0.4543	-0.050704	0.0096	1.28014e-07	0.0024	0.0118	0.8369	98.7629
ADHD	fibroblast growth factor 23	rs8085882	A	G	0.507	0.0522983	0.0096	5.10143e-08	-0.0266	0.0107	0.01281	105.946
ADHD	fibroblast growth factor 23	rs8089174	C	T	0.7087	-0.0465991	0.0105	9.0796e-06	0.0019	0.0127	0.8808	69.4393
ADHD	fibroblast growth factor 23	rs8132107	G	A	0.4722	0.0454035	0.0094	1.36425e-06	0.0126	0.0112	0.2612	79.5937
ADHD	fibroblast growth factor 23	rs9571014	C	T	0.9821	0.1582	0.0332	1.88808e-06	0.0083	0.036	0.8182	68.1492
ADHD	fibroblast growth factor 23	rs9574218	T	C	0.669	-0.0447986	0.0097	3.86679e-06	0.0019	0.0112	0.8629	68.8381
ADHD	fibroblast growth factor 23	rs9818469	C	T	0.5209	-0.046201	0.0093	6.76988e-07	0.0063	0.0104	0.5434	82.5288
ADHD	fibroblast growth factor 23	rs9840386	C	T	0.5179	0.0423025	0.0094	6.78686e-06	0.0122	0.012	0.3098	69.2089
ADHD	fibroblast growth factor 23	rs9902312	T	C	0.6541	-0.0471964	0.0099	1.86696e-06	0.0057	0.0118	0.6305	78.0746
ADHD	fibroblast growth factor 23	rs9969232	G	A	0.3936	-0.0683003	0.01	8.48996e-12	0.0024	0.0118	0.8404	172.697
ADHD	fibroblast growth factor 23	rs9984627	G	A	0.6272	-0.0513038	0.0097	1.22951e-07	-0.0086	0.0117	0.461	95.3619
ADHD	Parathyroid hormone	rs10177879	C	T	0.9702	-0.132001	0.0292	6.16684e-06	-0.0347	0.071	0.630957	78.0422
ADHD	Parathyroid hormone	rs10430636	G	A	0.6879	-0.0488962	0.01	1.01032e-06	0.0334	0.0272	0.218776	79.5195
ADHD	Parathyroid hormone	rs10795678	C	T	0.4115	0.0533038	0.0097	3.90192e-08	0.0079	0.0254	0.758578	106.632
ADHD	Parathyroid hormone	rs10810147	G	A	0.6233	0.0481995	0.0094	2.93447e-07	0.0025	0.0253	0.912011	84.5105
ADHD	Parathyroid hormone	rs10875612	C	T	0.4583	-0.0542978	0.0093	5.26813e-09	0.0073	0.0251	0.776247	113.441
ADHD	Parathyroid hormone	rs10965176	G	T	0.8131	0.0619978	0.0114	5.37602e-08	-0.0163	0.0311	0.60256	90.5049
ADHD	Parathyroid hormone	rs11121053	G	A	0.4056	0.0434043	0.0098	9.46684e-06	0.0073	0.0256	0.776247	70.355
ADHD	Parathyroid hormone	rs112741090	G	T	0.9423	0.0908	0.019	1.76214e-06	-0.0587	0.0485	0.223872	69.4361
ADHD	Parathyroid hormone	rs115111850	A	G	0.9523	-0.114895	0.0204	1.78035e-08	-0.0027	0.053	0.954993	92.9121
ADHD	Parathyroid hormone	rs11552464	T	G	0.8151	-0.0620988	0.0127	1.01004e-06	0.0487	0.033	0.138038	90.0489
ADHD	Parathyroid hormone	rs115607392	T	C	0.9751	-0.131305	0.0287	4.75998e-06	-0.0113	0.0714	0.870964	64.8389
ADHD	Parathyroid hormone	rs11596214	G	A	0.5596	0.0528012	0.0095	2.72858e-08	-0.037	0.026	0.154882	106.48
ADHD	Parathyroid hormone	rs1162202	C	T	0.6004	0.0613961	0.0102	1.75255e-09	-0.0536	0.0264	0.042658	140.214
ADHD	Parathyroid hormone	rs11649759	T	C	0.9672	-0.128004	0.0249	2.73693e-07	0.0206	0.0727	0.776247	80.5279
ADHD	Parathyroid hormone	rs12218778	G	A	0.8072	-0.0530949	0.0119	8.12901e-06	-0.0367	0.0322	0.251189	67.957
ADHD	Parathyroid hormone	rs12298657	C	T	0.7654	0.0509973	0.011	3.55021e-06	-0.0181	0.0283	0.524807	72.3393
ADHD	Parathyroid hormone	rs1246268	T	G	0.3111	-0.050399	0.01	4.65785e-07	-0.0093	0.0269	0.724436	84.3395
ADHD	Parathyroid hormone	rs12819667	C	T	0.4433	0.0556996	0.0093	2.10874e-09	-0.0372	0.0253	0.141254	118.672
ADHD	Parathyroid hormone	rs12952581	G	A	0.6342	-0.0440982	0.0096	4.35745e-06	0.0515	0.0262	0.0489779	69.8815
ADHD	Parathyroid hormone	rs13099657	G	A	0.8211	-0.0523043	0.0113	3.67965e-06	-0.0268	0.0314	0.389045	62.2429
ADHD	Parathyroid hormone	rs13163845	T	C	0.8479	0.0708032	0.0138	2.88714e-07	-0.0471	0.0354	0.18197	100.185
ADHD	Parathyroid hormone	rs13172973	G	A	0.6889	0.047103	0.0103	4.80539e-06	0.0191	0.0283	0.501187	73.659
ADHD	Parathyroid hormone	rs13176429	T	C	0.337	-0.0523043	0.0099	1.26901e-07	-0.0045	0.0267	0.870964	94.7128
ADHD	Parathyroid hormone	rs1335762	T	C	0.5736	-0.0440982	0.0096	4.35745e-06	-0.0181	0.0249	0.467735	73.6783
ADHD	Parathyroid hormone	rs1336187	G	A	0.5209	-0.0458031	0.0095	1.42567e-06	0.0168	0.0251	0.501187	81.1119
ADHD	Parathyroid hormone	rs13387644	G	A	0.5378	-0.0486967	0.0093	1.63916e-07	-0.0013	0.0256	0.954993	91.3314
ADHD	Parathyroid hormone	rs1343667	C	T	0.4284	0.0555955	0.0107	2.03794e-07	-0.0077	0.0252	0.758578	117.311
ADHD	Parathyroid hormone	rs1387671	T	G	0.495	0.0458048	0.0094	1.10002e-06	0.0222	0.0251	0.380189	81.2517
ADHD	Parathyroid hormone	rs139950543	G	A	0.9871	-0.189999	0.0398	1.80743e-06	0.0262	0.1017	0.794328	71.2052
ADHD	Parathyroid hormone	rs1431771	C	T	0.4433	-0.0473013	0.0107	9.83909e-06	0.0427	0.0247	0.0831764	85.5467
ADHD	Parathyroid hormone	rs145969813	C	A	0.9274	-0.0996988	0.021	2.05884e-06	0.0429	0.0478	0.371535	103.711
ADHD	Parathyroid hormone	rs150658015	T	C	0.9742	0.119604	0.0251	1.88775e-06	0.1018	0.0754	0.177828	55.6836
ADHD	Parathyroid hormone	rs1686469	A	G	0.3459	-0.0478046	0.01	1.7489e-06	0.004	0.0271	0.891251	80.1019
ADHD	Parathyroid hormone	rs17015512	T	C	0.66	-0.0494949	0.0097	3.35075e-07	-0.0544	0.026	0.0363078	85.1688
ADHD	Parathyroid hormone	rs17017439	C	T	0.7058	0.0479994	0.0099	1.24448e-06	-0.019	0.0264	0.467735	74.1088
ADHD	Parathyroid hormone	rs17597578	T	C	0.8708	0.0803996	0.0155	2.1363e-07	0.0103	0.0397	0.794328	112.714
ADHD	Parathyroid hormone	rs1760892	T	C	0.2485	-0.0505041	0.0111	5.36659e-06	-0.0057	0.0285	0.831764	73.7873
ADHD	Parathyroid hormone	rs17718444	C	T	0.6481	0.0611986	0.0103	2.82238e-09	0.0518	0.0266	0.0512861	132.417
ADHD	Parathyroid hormone	rs17758391	G	A	0.6909	0.0544977	0.0105	2.10009e-07	-0.0139	0.0273	0.60256	98.2833
ADHD	Parathyroid hormone	rs1790087	T	C	0.2247	-0.0555973	0.0114	1.07736e-06	0.0141	0.0305	0.645654	83.427
ADHD	Parathyroid hormone	rs1791785	C	T	0.7485	-0.0515038	0.0106	1.18068e-06	-0.0201	0.0285	0.47863	77.3574
ADHD	Parathyroid hormone	rs2025286	A	C	0.5437	-0.0548998	0.0093	3.56511e-09	0.0362	0.0255	0.154882	115.894
ADHD	Parathyroid hormone	rs2063640	C	A	0.9056	0.0894019	0.0202	9.60703e-06	-0.0188	0.0423	0.660693	105.89
ADHD	Parathyroid hormone	rs2107099	G	A	0.5427	-0.0490012	0.0095	2.49575e-07	-0.0398	0.0252	0.114815	92.3317
ADHD	Parathyroid hormone	rs2153168	C	T	0.8091	0.0639039	0.0138	3.64395e-06	-0.0056	0.0355	0.870964	97.7396
ADHD	Parathyroid hormone	rs247816	T	C	0.2942	-0.0618967	0.0136	5.33341e-06	0.055	0.0274	0.0446684	123.313
ADHD	Parathyroid hormone	rs2582895	C	A	0.6173	0.0724974	0.0096	4.29246e-14	0.0049	0.0255	0.851138	192.636
ADHD	Parathyroid hormone	rs263152	C	T	0.673	-0.0475005	0.0102	3.20989e-06	0.0316	0.0278	0.25704	76.9218
ADHD	Parathyroid hormone	rs2651569	T	C	0.4483	0.0465973	0.0094	7.15318e-07	0.0073	0.0247	0.776247	83.1991
ADHD	Parathyroid hormone	rs281297	T	C	0.6223	-0.0513986	0.0098	1.56493e-07	0.0443	0.026	0.0870964	96.216
ADHD	Parathyroid hormone	rs283469	G	T	0.7137	-0.0538967	0.0112	1.49275e-06	0.0049	0.0257	0.851138	91.9678
ADHD	Parathyroid hormone	rs2838762	A	C	0.4225	0.043701	0.0096	5.30898e-06	-0.0167	0.0252	0.512861	72.1815
ADHD	Parathyroid hormone	rs28694634	G	A	0.3569	-0.0553964	0.0105	1.32141e-07	0.0253	0.033	0.446684	109.159
ADHD	Parathyroid hormone	rs2886697	G	A	0.6521	0.0587971	0.0096	9.08576e-10	0.0107	0.0253	0.676083	121.568
ADHD	Parathyroid hormone	rs2933195	A	G	0.5467	-0.0423961	0.0094	6.47578e-06	0.0225	0.0249	0.363078	68.9975
ADHD	Parathyroid hormone	rs3001723	G	A	0.674	-0.0788051	0.0102	1.10984e-14	-0.0353	0.0265	0.18197	211.754
ADHD	Parathyroid hormone	rs3098651	T	C	0.2525	0.0505981	0.0112	6.25199e-06	-0.0121	0.0292	0.676083	74.8547
ADHD	Parathyroid hormone	rs34008721	T	C	0.6203	-0.0511038	0.0095	7.47547e-08	0.0404	0.0251	0.107152	95.3109
ADHD	Parathyroid hormone	rs34012672	C	T	0.8718	0.0656005	0.0137	1.68154e-06	-0.0124	0.0346	0.724436	74.5067
ADHD	Parathyroid hormone	rs35207123	A	C	0.8062	-0.0559039	0.0119	2.62969e-06	-0.0216	0.0316	0.489779	75.6422
ADHD	Parathyroid hormone	rs3782470	T	C	0.1034	-0.0720977	0.0153	2.44976e-06	-0.0173	0.0403	0.676083	74.6517
ADHD	Parathyroid hormone	rs3810414	T	C	0.7177	0.0515008	0.0105	9.35057e-07	0.0118	0.0277	0.676083	83.2544
ADHD	Parathyroid hormone	rs40071	T	C	0.8072	0.0683033	0.0142	1.50861e-06	-0.0198	0.0312	0.524807	112.528
ADHD	Parathyroid hormone	rs4613308	T	C	0.4881	-0.0507987	0.0106	1.64857e-06	-0.0274	0.0248	0.269153	99.9121
ADHD	Parathyroid hormone	rs4684906	A	G	0.6899	0.0452984	0.0099	4.74875e-06	-0.0079	0.0268	0.776247	67.9975
ADHD	Parathyroid hormone	rs4773306	G	A	0.4503	-0.0423023	0.0095	8.47304e-06	0.0125	0.0248	0.616595	68.6117
ADHD	Parathyroid hormone	rs4884	A	G	0.3091	-0.052199	0.0105	6.64951e-07	-0.0168	0.0277	0.537032	90.1576
ADHD	Parathyroid hormone	rs4916723	A	C	0.5865	-0.0852965	0.011	8.8884e-15	0.016	0.0257	0.537032	274.031
ADHD	Parathyroid hormone	rs4925811	T	G	0.5338	-0.0579999	0.0101	9.3251e-09	0.0601	0.0249	0.0154882	129.775
ADHD	Parathyroid hormone	rs4966011	G	A	0.6183	-0.051904	0.0109	1.9184e-06	0.0192	0.0255	0.457088	98.5223
ADHD	Parathyroid hormone	rs516890	C	T	0.4433	0.0483996	0.0104	3.25859e-06	-0.0075	0.0254	0.776247	89.5703
ADHD	Parathyroid hormone	rs5996841	T	C	0.7346	-0.0523043	0.0116	6.51357e-06	-0.0066	0.0277	0.812831	82.6322
ADHD	Parathyroid hormone	rs6082363	T	C	0.2942	0.0703	0.0101	3.39313e-12	-0.059	0.0274	0.0316228	159.142
ADHD	Parathyroid hormone	rs61894543	C	T	0.6879	-0.0527048	0.0114	3.77811e-06	-0.0048	0.0261	0.851138	92.4053
ADHD	Parathyroid hormone	rs6520015	T	C	0.5308	0.0448013	0.0099	6.02869e-06	-0.015	0.0263	0.562341	77.4395
ADHD	Parathyroid hormone	rs6537401	G	A	0.6491	-0.0568032	0.01	1.34444e-08	-0.0199	0.0262	0.446684	113.904
ADHD	Parathyroid hormone	rs6684722	C	T	0.3151	-0.0462953	0.0099	2.9211e-06	-0.0299	0.0263	0.25704	71.6489
ADHD	Parathyroid hormone	rs66968950	C	A	0.3956	0.0441987	0.0096	4.14393e-06	-0.0348	0.0252	0.165959	72.3543
ADHD	Parathyroid hormone	rs6757553	T	C	0.2614	0.0518047	0.0105	8.06543e-07	0.0119	0.0279	0.676083	80.2715
ADHD	Parathyroid hormone	rs67679818	C	T	0.4533	0.0425996	0.0094	5.84628e-06	-0.014	0.0258	0.588844	69.662
ADHD	Parathyroid hormone	rs705696	G	A	0.667	0.0452984	0.01	5.90295e-06	-0.0198	0.0258	0.446684	70.5976
ADHD	Parathyroid hormone	rs7100410	G	A	0.7465	-0.050399	0.0105	1.58744e-06	-0.0103	0.0276	0.707946	74.4607
ADHD	Parathyroid hormone	rs7119	C	T	0.5895	-0.0423961	0.0094	6.47578e-06	-0.0394	0.0246	0.109648	67.3731
ADHD	Parathyroid hormone	rs71428363	G	A	0.8807	0.0787003	0.0157	5.36559e-07	0.0133	0.0422	0.758578	100.843
ADHD	Parathyroid hormone	rs724973	C	T	0.6789	0.0555955	0.0121	4.33431e-06	-0.0096	0.0268	0.724436	104.417
ADHD	Parathyroid hormone	rs72663118	C	T	0.9125	-0.0854054	0.0164	1.91251e-07	0.0495	0.0421	0.239883	90.2353
ADHD	Parathyroid hormone	rs72854462	A	G	0.7773	0.0627964	0.0107	4.38906e-09	0.0581	0.0287	0.0436516	105.786
ADHD	Parathyroid hormone	rs72946217	A	C	0.8419	0.0605964	0.0129	2.63502e-06	0.0245	0.0335	0.467735	75.7128
ADHD	Parathyroid hormone	rs73007619	A	G	0.9831	-0.162095	0.0352	4.12495e-06	0.1658	0.1141	0.147911	67.6183
ADHD	Parathyroid hormone	rs73163723	A	G	0.7495	0.0558036	0.0108	2.3788e-07	-0.0072	0.0296	0.812831	90.588
ADHD	Parathyroid hormone	rs74714642	G	A	0.8012	-0.051904	0.0108	1.54036e-06	-0.0167	0.0297	0.57544	66.4646
ADHD	Parathyroid hormone	rs74760947	A	G	0.9404	-0.0953992	0.0209	5.00557e-06	0.0687	0.0587	0.239883	79.0224
ADHD	Parathyroid hormone	rs7485057	T	C	0.2247	0.049999	0.0108	3.66491e-06	0.0594	0.0298	0.0467735	67.4578
ADHD	Parathyroid hormone	rs7500087	C	T	0.8141	-0.0698969	0.0151	3.67559e-06	0.0105	0.0323	0.74131	114.597
ADHD	Parathyroid hormone	rs7506904	G	A	0.3797	-0.0559039	0.0098	1.16699e-08	-0.0247	0.0253	0.331131	114.084
ADHD	Parathyroid hormone	rs75069390	C	T	0.9851	0.201503	0.0441	4.89518e-06	0.1083	0.1006	0.281838	92.3436
ADHD	Parathyroid hormone	rs7534324	G	A	0.8539	-0.0669949	0.0133	4.72371e-07	0.0405	0.0358	0.25704	86.7532
ADHD	Parathyroid hormone	rs7563362	A	G	0.1461	-0.0644959	0.0137	2.50495e-06	-0.0283	0.0361	0.436516	80.3953
ADHD	Parathyroid hormone	rs7608383	A	C	0.8897	-0.0598031	0.0129	3.55391e-06	-0.017	0.0393	0.660693	54.3538
ADHD	Parathyroid hormone	rs7613360	C	T	0.6163	-0.0534008	0.0097	3.68677e-08	-0.0037	0.0254	0.891251	104.502
ADHD	Parathyroid hormone	rs76627874	A	G	0.9245	-0.0807004	0.0162	6.30908e-07	0.0092	0.0452	0.831764	70.414
ADHD	Parathyroid hormone	rs76696784	T	G	0.8062	-0.0494949	0.011	6.81015e-06	0.0266	0.031	0.389045	59.2801
ADHD	Parathyroid hormone	rs76857496	C	A	0.8569	0.0800027	0.014	1.10041e-08	-0.0026	0.0356	0.933254	121.652
ADHD	Parathyroid hormone	rs769267	G	A	0.3171	0.0452028	0.0097	3.16085e-06	0.0093	0.0261	0.724436	68.5373
ADHD	Parathyroid hormone	rs77960	G	A	0.6839	-0.0732053	0.01	2.46993e-13	-0.0164	0.0269	0.537032	179.708
ADHD	Parathyroid hormone	rs7819557	G	A	0.9583	-0.0966981	0.0214	6.22485e-06	0.1172	0.0603	0.0524807	57.8705
ADHD	Parathyroid hormone	rs7844069	T	G	0.3897	0.0551982	0.0095	6.23488e-09	-0.0114	0.0253	0.645654	112.308
ADHD	Parathyroid hormone	rs78648104	T	C	0.8827	0.0919956	0.0174	1.24268e-07	0.0337	0.0439	0.446684	135.852
ADHD	Parathyroid hormone	rs78909688	C	T	0.9254	-0.0785022	0.0174	6.43337e-06	-0.0212	0.0492	0.660693	65.8962
ADHD	Parathyroid hormone	rs79125067	G	A	0.9404	-0.0978003	0.019	2.64146e-07	0.0115	0.052	0.831764	83.0546
ADHD	Parathyroid hormone	rs7938490	T	C	0.341	-0.0486022	0.0096	4.13301e-07	-0.0313	0.0262	0.229087	82.2378
ADHD	Parathyroid hormone	rs8016504	C	A	0.4543	-0.050704	0.0096	1.28014e-07	-0.0138	0.0249	0.57544	98.7629
ADHD	Parathyroid hormone	rs8085882	A	G	0.507	0.0522983	0.0096	5.10143e-08	-0.003	0.0256	0.912011	105.946
ADHD	Parathyroid hormone	rs8089174	C	T	0.7087	-0.0465991	0.0105	9.0796e-06	-0.0062	0.0282	0.831764	69.4393
ADHD	Parathyroid hormone	rs8132107	G	A	0.4722	0.0454035	0.0094	1.36425e-06	0.0083	0.0247	0.74131	79.5937
ADHD	Parathyroid hormone	rs9571014	C	T	0.9821	0.1582	0.0332	1.88808e-06	0.0198	0.0817	0.812831	68.1492
ADHD	Parathyroid hormone	rs9574218	T	C	0.669	-0.0447986	0.0097	3.86679e-06	-0.0071	0.0255	0.776247	68.8381
ADHD	Parathyroid hormone	rs9818469	C	T	0.5209	-0.046201	0.0093	6.76988e-07	0.0216	0.0247	0.380189	82.5288
ADHD	Parathyroid hormone	rs9840386	C	T	0.5179	0.0423025	0.0094	6.78686e-06	0.0667	0.0252	0.00812831	69.2089
ADHD	Parathyroid hormone	rs9902312	T	C	0.6541	-0.0471964	0.0099	1.86696e-06	-0.013	0.0263	0.616595	78.0746
ADHD	Parathyroid hormone	rs9969232	G	A	0.3936	-0.0683003	0.01	8.48996e-12	0.0079	0.0258	0.758578	172.697
ADHD	Parathyroid hormone	rs9984627	G	A	0.6272	-0.0513038	0.0097	1.22951e-07	-0.0107	0.0263	0.676083	95.3619
MDD	Serum 25-Hydroxyvitamin D levels	rs1001138	C	G	0.2782	0.0221	0.0048	4.14e-06	0.00122	0.002174	0.574795	98.1329
MDD	Serum 25-Hydroxyvitamin D levels	rs10105127	T	C	0.3522	-0.0211	0.0045	2.75e-06	0.001108	0.002058	0.590457	101.638
MDD	Serum 25-Hydroxyvitamin D levels	rs1016165	T	C	0.5644	0.0221	0.0044	5.09e-07	-0.003211	0.001962	0.101589	120.153
MDD	Serum 25-Hydroxyvitamin D levels	rs1021363	A	G	0.3566	0.03	0.0045	2.62e-11	-0.004364	0.002029	0.0314739	206.66
MDD	Serum 25-Hydroxyvitamin D levels	rs10415547	T	C	0.253	-0.0231	0.005	3.84e-06	-0.004335	0.002253	0.0543713	100.908
MDD	Serum 25-Hydroxyvitamin D levels	rs10501696	A	G	0.5052	0.0295	0.0044	2.02e-11	-0.004904	0.001989	0.0136889	217.719
MDD	Serum 25-Hydroxyvitamin D levels	rs10747480	A	G	0.5246	0.0207	0.0044	2.54e-06	0.000802	0.00194	0.679527	106.928
MDD	Serum 25-Hydroxyvitamin D levels	rs10755215	T	C	0.4324	0.0225	0.0043	1.67e-07	0.000536	0.001961	0.784652	124.329
MDD	Serum 25-Hydroxyvitamin D levels	rs10818865	A	G	0.7895	-0.0252	0.0053	1.99e-06	0.004154	0.002398	0.08314	105.601
MDD	Serum 25-Hydroxyvitamin D levels	rs10833984	A	G	0.5963	-0.0198	0.0045	1.08e-05	-0.001371	0.002025	0.498462	94.4293
MDD	Serum 25-Hydroxyvitamin D levels	rs10931670	T	G	0.7244	-0.0218	0.0048	5.58e-06	0.00115	0.002175	0.596774	94.9345
MDD	Serum 25-Hydroxyvitamin D levels	rs10961649	T	C	0.3209	0.023	0.0046	5.73e-07	-0.004014	0.002089	0.0547268	115.353
MDD	Serum 25-Hydroxyvitamin D levels	rs111605708	A	T	0.9589	0.0524	0.0113	3.53e-06	0.002704	0.005029	0.590798	108.279
MDD	Serum 25-Hydroxyvitamin D levels	rs1116690	A	G	0.2515	-0.025	0.005	5.73e-07	-0.005228	0.002229	0.018995	117.729
MDD	Serum 25-Hydroxyvitamin D levels	rs111750830	A	G	0.084	0.0358	0.0078	4.44e-06	-0.000196	0.003496	0.955304	98.6728
MDD	Serum 25-Hydroxyvitamin D levels	rs11220798	T	C	0.0718	0.0401	0.0083	1.36e-06	0.010241	0.003752	0.00635302	107.231
MDD	Serum 25-Hydroxyvitamin D levels	rs11250015	A	G	0.1893	0.0291	0.0055	1.22e-07	-0.000286	0.002486	0.908299	130.041
MDD	Serum 25-Hydroxyvitamin D levels	rs112844822	T	C	0.0315	0.0651	0.0128	3.66e-07	-0.010534	0.0058	0.069341	129.377
MDD	Serum 25-Hydroxyvitamin D levels	rs113039421	A	G	0.178	-0.0257	0.0056	4.45e-06	-0.002844	0.002536	0.261901	96.697
MDD	Serum 25-Hydroxyvitamin D levels	rs114857023	T	C	0.033	0.0683	0.0119	9.5e-09	0.002136	0.005371	0.690908	148.964
MDD	Serum 25-Hydroxyvitamin D levels	rs11577530	T	C	0.1859	0.0271	0.0055	8.34e-07	0.00338	0.002496	0.175747	111.215
MDD	Serum 25-Hydroxyvitamin D levels	rs11612312	T	C	0.7965	-0.0309	0.0054	1.05e-08	0.00123	0.002429	0.612515	154.872
MDD	Serum 25-Hydroxyvitamin D levels	rs11755188	T	C	0.0609	0.0429	0.0093	3.97e-06	-0.006879	0.004142	0.096732	105.319
MDD	Serum 25-Hydroxyvitamin D levels	rs117987599	A	T	0.0118	0.145	0.0297	1.05e-06	-0.052787	0.017017	0.00193001	245.384
MDD	Serum 25-Hydroxyvitamin D levels	rs11826373	T	C	0.8089	-0.0248	0.0055	6.51e-06	-0.00188	0.002519	0.455334	95.1289
MDD	Serum 25-Hydroxyvitamin D levels	rs11850030	C	G	0.8195	-0.027	0.0056	1.43e-06	0.004685	0.002538	0.0649367	107.899
MDD	Serum 25-Hydroxyvitamin D levels	rs12040241	T	C	0.6194	0.0259	0.0044	3.95e-09	-0.002799	0.001996	0.160792	158.252
MDD	Serum 25-Hydroxyvitamin D levels	rs12123067	A	G	0.4218	0.0229	0.0043	1.01e-07	0.003317	0.001968	0.0918967	127.979
MDD	Serum 25-Hydroxyvitamin D levels	rs12125521	T	C	0.7117	0.0221	0.0048	4.14e-06	-0.006821	0.002154	0.00154899	100.273
MDD	Serum 25-Hydroxyvitamin D levels	rs12160976	A	G	0.3399	-0.0243	0.0047	2.34e-07	0.001639	0.002091	0.43316	132.574
MDD	Serum 25-Hydroxyvitamin D levels	rs12487069	A	G	0.5623	-0.0202	0.0043	2.63e-06	0.000413	0.001959	0.83286	100.486
MDD	Serum 25-Hydroxyvitamin D levels	rs12513440	A	G	0.2432	0.0226	0.005	6.18e-06	0.001577	0.002265	0.486189	94.062
MDD	Serum 25-Hydroxyvitamin D levels	rs12526217	T	C	0.8774	0.0344	0.0066	1.87e-07	-0.001235	0.002979	0.678402	127.376
MDD	Serum 25-Hydroxyvitamin D levels	rs12542837	T	C	0.6118	-0.0207	0.0044	2.54e-06	0.001053	0.002	0.598807	101.828
MDD	Serum 25-Hydroxyvitamin D levels	rs12547021	T	C	0.2612	0.0234	0.0049	1.79e-06	0.000788	0.002214	0.721932	105.729
MDD	Serum 25-Hydroxyvitamin D levels	rs12589834	A	G	0.7443	0.027	0.0051	1.2e-07	-0.00396	0.002305	0.0858341	138.835
MDD	Serum 25-Hydroxyvitamin D levels	rs12615271	A	G	0.2818	-0.0223	0.0048	3.39e-06	0.002219	0.002152	0.302536	100.706
MDD	Serum 25-Hydroxyvitamin D levels	rs12619197	A	G	0.4515	0.0233	0.0043	6.01e-08	2e-06	0.001951	0.999133	134.535
MDD	Serum 25-Hydroxyvitamin D levels	rs12627769	A	G	0.1914	-0.0258	0.0055	2.72e-06	0.001053	0.002481	0.67129	103.08
MDD	Serum 25-Hydroxyvitamin D levels	rs12631196	A	G	0.4226	0.0241	0.0044	4.32e-08	-0.00088	0.001974	0.655793	141.819
MDD	Serum 25-Hydroxyvitamin D levels	rs12661596	A	G	0.7646	0.0254	0.0051	6.35e-07	-0.000126	0.002314	0.956639	116.193
MDD	Serum 25-Hydroxyvitamin D levels	rs12935276	T	G	0.741	-0.026	0.005	1.99e-07	0.006817	0.002219	0.00213201	129.822
MDD	Serum 25-Hydroxyvitamin D levels	rs12962980	C	G	0.1899	-0.0249	0.0055	5.97e-06	-0.003181	0.002461	0.196179	95.4369
MDD	Serum 25-Hydroxyvitamin D levels	rs12967143	C	G	0.7012	-0.0345	0.0047	2.13e-13	-0.002378	0.002138	0.266009	249.602
MDD	Serum 25-Hydroxyvitamin D levels	rs12967855	A	G	0.3303	0.0294	0.0046	1.64e-10	-0.001107	0.002075	0.593662	191.347
MDD	Serum 25-Hydroxyvitamin D levels	rs1364854	T	C	0.4884	-0.0194	0.0043	6.43e-06	-0.002303	0.001944	0.236088	94.0941
MDD	Serum 25-Hydroxyvitamin D levels	rs1414622	T	C	0.9222	0.0408	0.008	3.4e-07	0.001628	0.00364	0.654684	119.509
MDD	Serum 25-Hydroxyvitamin D levels	rs1461225	T	G	0.7525	0.0227	0.005	5.63e-06	0.001706	0.002263	0.451004	96.0258
MDD	Serum 25-Hydroxyvitamin D levels	rs146724204	A	G	0.0208	-0.0711	0.0159	7.76e-06	-0.005698	0.006988	0.414869	103.023
MDD	Serum 25-Hydroxyvitamin D levels	rs1477272	T	C	0.54	0.0203	0.0044	3.96e-06	7.8e-05	0.00195	0.968154	102.424
MDD	Serum 25-Hydroxyvitamin D levels	rs148065028	T	C	0.989	-0.118	0.0253	3.1e-06	-0.009935	0.012895	0.44105	151.585
MDD	Serum 25-Hydroxyvitamin D levels	rs150346963	T	C	0.4118	0.0283	0.0044	1.26e-10	-0.00161	0.002007	0.422585	194.144
MDD	Serum 25-Hydroxyvitamin D levels	rs150586937	A	C	0.0104	-0.1074	0.0224	1.63e-06	-0.007426	0.009713	0.444592	118.789
MDD	Serum 25-Hydroxyvitamin D levels	rs1512547	A	G	0.3125	-0.0231	0.0047	8.88e-07	-0.005238	0.002107	0.0129411	114.714
MDD	Serum 25-Hydroxyvitamin D levels	rs1530310	A	G	0.6993	0.0221	0.0047	2.57e-06	-0.002057	0.002135	0.335243	102.764
MDD	Serum 25-Hydroxyvitamin D levels	rs168785	T	C	0.7581	0.0239	0.005	1.75e-06	-0.003416	0.002279	0.133889	104.814
MDD	Serum 25-Hydroxyvitamin D levels	rs184439804	A	G	0.9134	0.0365	0.0081	6.6e-06	-0.006413	0.003606	0.0753217	105.445
MDD	Serum 25-Hydroxyvitamin D levels	rs1862743	A	C	0.4941	-0.0214	0.0043	6.47e-07	-0.002409	0.001949	0.216287	114.545
MDD	Serum 25-Hydroxyvitamin D levels	rs1908953	T	G	0.447	-0.0222	0.0044	4.52e-07	0.001112	0.001973	0.573092	121.903
MDD	Serum 25-Hydroxyvitamin D levels	rs1950829	A	G	0.4827	0.0297	0.0043	4.95e-12	0.000206	0.001961	0.916142	220.442
MDD	Serum 25-Hydroxyvitamin D levels	rs1955596	T	C	0.9275	-0.0398	0.0084	2.16e-06	-0.000683	0.00374	0.854976	106.581
MDD	Serum 25-Hydroxyvitamin D levels	rs198457	T	C	0.1886	-0.0315	0.0056	1.86e-08	0.002252	0.002498	0.367369	151.95
MDD	Serum 25-Hydroxyvitamin D levels	rs2111592	A	G	0.3141	0.0263	0.0046	1.08e-08	-0.000923	0.002091	0.65886	149.122
MDD	Serum 25-Hydroxyvitamin D levels	rs2132342	A	G	0.4021	-0.0223	0.0044	4.02e-07	0.001131	0.001973	0.566499	119.632
MDD	Serum 25-Hydroxyvitamin D levels	rs2134025	A	G	0.2298	0.0253	0.0052	1.14e-06	0.002074	0.002342	0.375961	113.361
MDD	Serum 25-Hydroxyvitamin D levels	rs2214123	A	G	0.3534	0.0261	0.0045	6.63e-09	0.000175	0.002053	0.931949	155.772
MDD	Serum 25-Hydroxyvitamin D levels	rs2225434	T	C	0.4341	-0.0224	0.0045	6.43e-07	0.005196	0.002	0.0093981	123.34
MDD	Serum 25-Hydroxyvitamin D levels	rs2237738	A	G	0.6224	0.0206	0.0044	2.84e-06	-0.00239	0.002004	0.232893	99.7915
MDD	Serum 25-Hydroxyvitamin D levels	rs2246221	A	G	0.5018	0.0219	0.0043	3.52e-07	-0.001485	0.001939	0.443817	119.977
MDD	Serum 25-Hydroxyvitamin D levels	rs2418449	T	C	0.719	0.0281	0.0048	4.79e-09	-0.001933	0.002163	0.371459	159.646
MDD	Serum 25-Hydroxyvitamin D levels	rs2488389	A	G	0.2179	-0.0295	0.0052	1.4e-08	-0.004278	0.002359	0.0697493	148.41
MDD	Serum 25-Hydroxyvitamin D levels	rs2582954	T	C	0.4005	-0.0222	0.0044	4.52e-07	0.003217	0.001992	0.10634	118.405
MDD	Serum 25-Hydroxyvitamin D levels	rs2686340	T	C	0.1985	0.0256	0.0054	2.13e-06	0.001858	0.002435	0.445376	104.329
MDD	Serum 25-Hydroxyvitamin D levels	rs28541419	C	G	0.7692	0.0292	0.0052	1.96e-08	-0.003734	0.002341	0.110732	151.476
MDD	Serum 25-Hydroxyvitamin D levels	rs2888566	T	C	0.8489	-0.0285	0.006	2.03e-06	-0.006765	0.00272	0.0129009	104.249
MDD	Serum 25-Hydroxyvitamin D levels	rs30266	A	G	0.3271	0.0366	0.0046	1.77e-15	0.000445	0.00207	0.829863	295.135
MDD	Serum 25-Hydroxyvitamin D levels	rs3099439	T	C	0.5351	-0.0241	0.0043	2.09e-08	-0.000438	0.001974	0.824408	144.586
MDD	Serum 25-Hydroxyvitamin D levels	rs34232444	T	C	0.6556	-0.0216	0.0046	2.66e-06	-0.006264	0.002072	0.00251102	105.408
MDD	Serum 25-Hydroxyvitamin D levels	rs34947393	C	G	0.0296	-0.0605	0.013	3.26e-06	0.003368	0.005804	0.561752	105.2
MDD	Serum 25-Hydroxyvitamin D levels	rs35377763	A	G	0.521	-0.0203	0.0043	2.35e-06	0.002237	0.001946	0.250355	102.902
MDD	Serum 25-Hydroxyvitamin D levels	rs35553410	T	C	0.7451	-0.0249	0.0049	3.74e-07	-0.000977	0.002215	0.659254	117.83
MDD	Serum 25-Hydroxyvitamin D levels	rs3807865	A	G	0.4105	0.031	0.0044	1.85e-12	-0.001511	0.001969	0.443073	232.752
MDD	Serum 25-Hydroxyvitamin D levels	rs3843487	T	G	0.0704	-0.0413	0.0084	8.8e-07	-0.002661	0.003822	0.486296	111.696
MDD	Serum 25-Hydroxyvitamin D levels	rs4141983	T	C	0.674	0.0264	0.0046	9.52e-09	-0.000574	0.002084	0.783067	153.246
MDD	Serum 25-Hydroxyvitamin D levels	rs42858	A	T	0.2296	0.0244	0.0052	2.7e-06	0.001338	0.002362	0.571198	105.373
MDD	Serum 25-Hydroxyvitamin D levels	rs4404022	A	T	0.5884	-0.0204	0.0044	3.55e-06	-0.001632	0.001979	0.409472	100.848
MDD	Serum 25-Hydroxyvitamin D levels	rs4655127	A	G	0.8144	-0.0248	0.0056	9.49e-06	0.003424	0.002527	0.175374	93.0188
MDD	Serum 25-Hydroxyvitamin D levels	rs4707630	T	C	0.2592	0.0225	0.0049	4.39e-06	0.002202	0.002227	0.32268	97.265
MDD	Serum 25-Hydroxyvitamin D levels	rs4719771	T	C	0.8818	-0.0298	0.0067	8.68e-06	-0.000746	0.003024	0.80509	92.6129
MDD	Serum 25-Hydroxyvitamin D levels	rs4735241	A	G	0.5607	0.0209	0.0044	2.03e-06	-0.003354	0.001965	0.0879407	107.659
MDD	Serum 25-Hydroxyvitamin D levels	rs4772087	T	C	0.3766	0.0213	0.0045	2.21e-06	-0.001294	0.002026	0.522898	106.579
MDD	Serum 25-Hydroxyvitamin D levels	rs4895718	T	C	0.6656	-0.0224	0.0045	6.43e-07	0.002058	0.002059	0.317487	111.749
MDD	Serum 25-Hydroxyvitamin D levels	rs4938021	T	C	0.622	0.0278	0.0044	2.65e-10	0.003722	0.001998	0.0625101	181.845
MDD	Serum 25-Hydroxyvitamin D levels	rs4971040	A	C	0.1604	-0.0286	0.0059	1.25e-06	-0.004346	0.00266	0.102286	110.224
MDD	Serum 25-Hydroxyvitamin D levels	rs508502	T	C	0.2992	-0.0264	0.0048	3.8e-08	0.000436	0.002145	0.839095	146.238
MDD	Serum 25-Hydroxyvitamin D levels	rs537362	C	G	0.9068	-0.033	0.0074	8.22e-06	0.001325	0.003348	0.692215	92.0887
MDD	Serum 25-Hydroxyvitamin D levels	rs547492	A	G	0.553	-0.0202	0.0043	2.63e-06	-0.000415	0.001959	0.83208	100.924
MDD	Serum 25-Hydroxyvitamin D levels	rs55897719	A	C	0.3153	0.0255	0.0046	2.97e-08	0.003391	0.002123	0.1103	140.475
MDD	Serum 25-Hydroxyvitamin D levels	rs55908506	A	C	0.9199	0.0397	0.008	6.96e-07	-0.000784	0.003627	0.828873	116.205
MDD	Serum 25-Hydroxyvitamin D levels	rs56115484	T	C	0.1988	-0.0245	0.0054	5.71e-06	-0.004104	0.002445	0.0932116	95.6629
MDD	Serum 25-Hydroxyvitamin D levels	rs56211578	A	C	0.8467	-0.0275	0.006	4.58e-06	6.2e-05	0.00273	0.981758	98.2185
MDD	Serum 25-Hydroxyvitamin D levels	rs5771864	T	C	0.4305	0.0202	0.0044	4.41e-06	0.000334	0.002002	0.867647	100.099
MDD	Serum 25-Hydroxyvitamin D levels	rs578174	A	G	0.8948	0.0364	0.0072	4.29e-07	0.001692	0.003201	0.597055	124.803
MDD	Serum 25-Hydroxyvitamin D levels	rs590503	T	C	0.9037	0.0416	0.0073	1.21e-08	0.008123	0.003332	0.014803	150.709
MDD	Serum 25-Hydroxyvitamin D levels	rs59082935	T	C	0.1342	0.0363	0.0066	3.8e-08	0.001601	0.002931	0.585012	153.21
MDD	Serum 25-Hydroxyvitamin D levels	rs59283172	A	G	0.1081	-0.039	0.007	2.53e-08	0.003133	0.003185	0.32524	146.747
MDD	Serum 25-Hydroxyvitamin D levels	rs60157091	T	C	0.5126	0.0215	0.0043	5.73e-07	-0.000773	0.001944	0.691145	115.561
MDD	Serum 25-Hydroxyvitamin D levels	rs61001062	A	G	0.1162	0.0349	0.0067	1.9e-07	0.000752	0.003036	0.804365	125.167
MDD	Serum 25-Hydroxyvitamin D levels	rs62419352	A	G	0.9721	-0.0631	0.014	6.57e-06	0.010193	0.006264	0.103664	108.053
MDD	Serum 25-Hydroxyvitamin D levels	rs62535714	A	G	0.1639	0.0339	0.0058	5.07e-09	-0.002702	0.002634	0.305009	157.596
MDD	Serum 25-Hydroxyvitamin D levels	rs6429297	A	G	0.4802	-0.0191	0.0043	8.92e-06	0.001371	0.001949	0.481761	91.112
MDD	Serum 25-Hydroxyvitamin D levels	rs6449561	C	G	0.2238	0.0242	0.0052	3.26e-06	-9.1e-05	0.002344	0.968934	101.794
MDD	Serum 25-Hydroxyvitamin D levels	rs6479487	T	G	0.8436	-0.0296	0.0059	5.25e-07	-0.001003	0.002674	0.707607	115.672
MDD	Serum 25-Hydroxyvitamin D levels	rs6479744	T	C	0.5112	0.0209	0.0043	1.17e-06	-0.000456	0.001949	0.814979	109.215
MDD	Serum 25-Hydroxyvitamin D levels	rs6493274	A	C	0.7881	-0.0268	0.0052	2.55e-07	-0.000262	0.002389	0.912514	120.021
MDD	Serum 25-Hydroxyvitamin D levels	rs6508230	T	C	0.4343	0.0227	0.0044	2.48e-07	-3.4e-05	0.001999	0.986333	126.68
MDD	Serum 25-Hydroxyvitamin D levels	rs6553965	A	G	0.6676	-0.0222	0.0046	1.39e-06	0.001258	0.002059	0.541125	109.433
MDD	Serum 25-Hydroxyvitamin D levels	rs6602459	C	G	0.7395	-0.0236	0.0051	3.7e-06	0.000354	0.002233	0.873997	107.358
MDD	Serum 25-Hydroxyvitamin D levels	rs6606679	T	C	0.3392	-0.024	0.0046	1.81e-07	-0.000255	0.002061	0.901575	129.191
MDD	Serum 25-Hydroxyvitamin D levels	rs66511648	T	C	0.716	-0.0297	0.0048	6.11e-10	0.002432	0.002163	0.260775	179.503
MDD	Serum 25-Hydroxyvitamin D levels	rs6656912	T	C	0.4273	-0.0252	0.0043	4.62e-09	0.00207	0.001968	0.2928	155.513
MDD	Serum 25-Hydroxyvitamin D levels	rs67303470	A	G	0.8996	0.0362	0.0078	3.47e-06	0.002935	0.003553	0.408829	118.433
MDD	Serum 25-Hydroxyvitamin D levels	rs67436663	C	G	0.2378	-0.0258	0.0052	6.99e-07	-0.000676	0.002362	0.774786	120.725
MDD	Serum 25-Hydroxyvitamin D levels	rs6746122	A	G	0.3405	0.0226	0.0046	8.97e-07	-0.003931	0.002092	0.060299	114.768
MDD	Serum 25-Hydroxyvitamin D levels	rs67767662	T	G	0.799	-0.0248	0.0054	4.38e-06	0.002298	0.002411	0.340419	98.8333
MDD	Serum 25-Hydroxyvitamin D levels	rs67981811	C	G	0.8944	0.062	0.007	8.21e-19	-0.000738	0.003044	0.808502	363.468
MDD	Serum 25-Hydroxyvitamin D levels	rs6828427	T	C	0.7805	0.0232	0.0052	8.14e-06	-0.00242	0.002358	0.304697	92.2645
MDD	Serum 25-Hydroxyvitamin D levels	rs6846784	T	C	0.619	-0.0209	0.0044	2.03e-06	-0.001722	0.001995	0.388103	103.079
MDD	Serum 25-Hydroxyvitamin D levels	rs7046881	T	G	0.5782	0.021	0.0044	1.82e-06	-0.002066	0.001971	0.294674	107.619
MDD	Serum 25-Hydroxyvitamin D levels	rs7098208	T	C	0.2482	0.0239	0.0052	4.3e-06	-0.002908	0.002258	0.197751	106.651
MDD	Serum 25-Hydroxyvitamin D levels	rs7152906	T	C	0.4804	-0.0258	0.0043	1.97e-09	-5.5e-05	0.001948	0.977531	166.275
MDD	Serum 25-Hydroxyvitamin D levels	rs7241572	A	G	0.2047	0.0323	0.0054	2.21e-09	-0.001305	0.002434	0.591894	169.97
MDD	Serum 25-Hydroxyvitamin D levels	rs72737061	T	C	0.9325	-0.0438	0.0086	3.52e-07	-0.000693	0.003851	0.857231	120.831
MDD	Serum 25-Hydroxyvitamin D levels	rs73225543	T	C	0.0596	0.0443	0.0093	1.9e-06	-0.006542	0.004131	0.113213	110.061
MDD	Serum 25-Hydroxyvitamin D levels	rs73350816	A	G	0.1665	-0.0265	0.0059	7.07e-06	0.002624	0.002679	0.327352	97.5141
MDD	Serum 25-Hydroxyvitamin D levels	rs7502539	A	G	0.34	-0.0229	0.0046	6.42e-07	-0.001361	0.002085	0.514024	117.752
MDD	Serum 25-Hydroxyvitamin D levels	rs7551758	T	G	0.4671	-0.0283	0.0043	4.66e-11	0.00275	0.001945	0.157346	199.514
MDD	Serum 25-Hydroxyvitamin D levels	rs7564151	C	G	0.3921	-0.0236	0.0044	8.16e-08	0.003894	0.002007	0.0523191	132.843
MDD	Serum 25-Hydroxyvitamin D levels	rs7584419	A	C	0.3451	0.0211	0.0045	2.75e-06	-0.000882	0.002038	0.664991	100.68
MDD	Serum 25-Hydroxyvitamin D levels	rs75889584	A	G	0.9857	-0.0919	0.0202	5.38e-06	-0.007836	0.009131	0.390793	119.12
MDD	Serum 25-Hydroxyvitamin D levels	rs7617480	A	C	0.2261	0.029	0.0051	1.3e-08	0.006004	0.002328	0.00992499	147.258
MDD	Serum 25-Hydroxyvitamin D levels	rs76227152	A	C	0.9551	0.0518	0.0104	6.33e-07	-0.003534	0.004655	0.447782	115.14
MDD	Serum 25-Hydroxyvitamin D levels	rs76812845	A	T	0.9791	-0.0716	0.015	1.81e-06	0.009284	0.006724	0.167342	104.969
MDD	Serum 25-Hydroxyvitamin D levels	rs7721129	A	G	0.5343	0.029	0.0043	1.54e-11	0.003663	0.001948	0.0600261	209.431
MDD	Serum 25-Hydroxyvitamin D levels	rs77579223	T	C	0.2536	-0.0251	0.005	5.17e-07	0.007024	0.002291	0.002174	119.328
MDD	Serum 25-Hydroxyvitamin D levels	rs7758630	A	T	0.4046	-0.0229	0.0044	1.94e-07	-0.001473	0.001984	0.457691	126.411
MDD	Serum 25-Hydroxyvitamin D levels	rs779	A	G	0.8831	-0.0311	0.0068	4.8e-06	0.002111	0.003043	0.487809	99.9086
MDD	Serum 25-Hydroxyvitamin D levels	rs7797112	T	C	0.7467	0.027	0.0049	3.58e-08	-0.003564	0.002247	0.112719	137.975
MDD	Serum 25-Hydroxyvitamin D levels	rs780025	T	G	0.3428	0.0239	0.0046	2.04e-07	0.003296	0.002079	0.112845	128.771
MDD	Serum 25-Hydroxyvitamin D levels	rs7842361	T	C	0.1372	-0.0325	0.0063	2.49e-07	0.002388	0.002839	0.400294	125.115
MDD	Serum 25-Hydroxyvitamin D levels	rs8015283	A	G	0.1253	0.0304	0.0065	2.91e-06	-0.002903	0.002951	0.32522	101.348
MDD	Serum 25-Hydroxyvitamin D levels	rs843812	A	G	0.4117	0.0248	0.0044	1.74e-08	-0.002234	0.001981	0.259432	149.068
MDD	Serum 25-Hydroxyvitamin D levels	rs905111	A	G	0.2866	0.0219	0.0048	5.05e-06	5.6e-05	0.002144	0.978974	98.1192
MDD	Serum 25-Hydroxyvitamin D levels	rs9074	A	G	0.2597	0.031	0.0049	2.51e-10	0.003115	0.002214	0.159464	184.899
MDD	Serum 25-Hydroxyvitamin D levels	rs908639	T	C	0.1979	-0.0242	0.0054	7.41e-06	-0.002409	0.002431	0.321717	93.0158
MDD	Serum 25-Hydroxyvitamin D levels	rs9307085	T	C	0.9097	0.0384	0.0076	4.36e-07	0.003156	0.003361	0.347728	121.206
MDD	Serum 25-Hydroxyvitamin D levels	rs9364755	A	G	0.7738	-0.0283	0.0051	2.87e-08	0.002843	0.002317	0.219804	140.277
MDD	Serum 25-Hydroxyvitamin D levels	rs9529314	A	G	0.2028	-0.0335	0.0053	2.6e-10	0.000526	0.002413	0.827503	181.574
MDD	Serum 25-Hydroxyvitamin D levels	rs9538160	A	G	0.3673	-0.0225	0.0045	5.73e-07	-0.002216	0.002025	0.273827	117.722
MDD	Serum 25-Hydroxyvitamin D levels	rs9596774	T	C	0.3261	0.0255	0.0046	2.97e-08	0.001595	0.002068	0.440596	142.995
MDD	Serum 25-Hydroxyvitamin D levels	rs9825208	T	G	0.4454	-0.0204	0.0043	2.09e-06	0.004825	0.00196	0.013873	102.861
MDD	Serum 25-Hydroxyvitamin D levels	rs9920233	A	C	0.4686	-0.0202	0.0043	2.63e-06	0.002587	0.001945	0.183493	101.668
MDD	fibroblast growth factor 23	rs1001138	C	G	0.2782	0.0221	0.0048	4.14e-06	-0.0133	0.012	0.2677	98.1329
MDD	fibroblast growth factor 23	rs10105127	T	C	0.3522	-0.0211	0.0045	2.75e-06	0.015	0.0114	0.1889	101.638
MDD	fibroblast growth factor 23	rs1016165	T	C	0.5644	0.0221	0.0044	5.09e-07	-0.0055	0.0119	0.641501	120.153
MDD	fibroblast growth factor 23	rs1021363	A	G	0.3566	0.03	0.0045	2.62e-11	-0.0012	0.0113	0.9142	206.66
MDD	fibroblast growth factor 23	rs10415547	T	C	0.253	-0.0231	0.005	3.84e-06	0.0365	0.0133	0.00615205	100.908
MDD	fibroblast growth factor 23	rs10501696	A	G	0.5052	0.0295	0.0044	2.02e-11	0.0166	0.0119	0.1614	217.719
MDD	fibroblast growth factor 23	rs10747480	A	G	0.5246	0.0207	0.0044	2.54e-06	0.0027	0.0104	0.7938	106.928
MDD	fibroblast growth factor 23	rs10755215	T	C	0.4324	0.0225	0.0043	1.67e-07	-0.0045	0.0117	0.7	124.329
MDD	fibroblast growth factor 23	rs10767735	C	G	0.3979	-0.0234	0.0044	1.05e-07	0.0064	0.0107	0.552901	131.268
MDD	fibroblast growth factor 23	rs10818865	A	G	0.7895	-0.0252	0.0053	1.99e-06	-0.0127	0.0119	0.2882	105.601
MDD	fibroblast growth factor 23	rs10833984	A	G	0.5963	-0.0198	0.0045	1.08e-05	-0.0035	0.0121	0.7759	94.4293
MDD	fibroblast growth factor 23	rs10931670	T	G	0.7244	-0.0218	0.0048	5.58e-06	-0.0182	0.0121	0.1306	94.9345
MDD	fibroblast growth factor 23	rs10961649	T	C	0.3209	0.023	0.0046	5.73e-07	0.0039	0.0125	0.755499	115.353
MDD	fibroblast growth factor 23	rs111605708	A	T	0.9589	0.0524	0.0113	3.53e-06	-0.0095	0.0332	0.774901	108.279
MDD	fibroblast growth factor 23	rs1116690	A	G	0.2515	-0.025	0.005	5.73e-07	-0.029	0.0128	0.02391	117.729
MDD	fibroblast growth factor 23	rs111750830	A	G	0.084	0.0358	0.0078	4.44e-06	0.0058	0.0211	0.781801	98.6728
MDD	fibroblast growth factor 23	rs11220798	T	C	0.0718	0.0401	0.0083	1.36e-06	-0.0139	0.0188	0.4602	107.231
MDD	fibroblast growth factor 23	rs11250015	A	G	0.1893	0.0291	0.0055	1.22e-07	0.0061	0.0132	0.645199	130.041
MDD	fibroblast growth factor 23	rs112844822	T	C	0.0315	0.0651	0.0128	3.66e-07	0.015	0.0312	0.6294	129.377
MDD	fibroblast growth factor 23	rs113039421	A	G	0.178	-0.0257	0.0056	4.45e-06	-0.0093	0.0145	0.5202	96.697
MDD	fibroblast growth factor 23	rs114857023	T	C	0.033	0.0683	0.0119	9.5e-09	-0.0254	0.0293	0.3852	148.964
MDD	fibroblast growth factor 23	rs11577530	T	C	0.1859	0.0271	0.0055	8.34e-07	0.0288	0.0138	0.0369999	111.215
MDD	fibroblast growth factor 23	rs11612312	T	C	0.7965	-0.0309	0.0054	1.05e-08	-0.0072	0.0137	0.597	154.872
MDD	fibroblast growth factor 23	rs11755188	T	C	0.0609	0.0429	0.0093	3.97e-06	-0.0122	0.0238	0.6069	105.319
MDD	fibroblast growth factor 23	rs117987599	A	T	0.0118	0.145	0.0297	1.05e-06	-0.0066	0.0467	0.8878	245.384
MDD	fibroblast growth factor 23	rs11826373	T	C	0.8089	-0.0248	0.0055	6.51e-06	0.0053	0.0144	0.710901	95.1289
MDD	fibroblast growth factor 23	rs11850030	C	G	0.8195	-0.027	0.0056	1.43e-06	0.0072	0.013	0.579499	107.899
MDD	fibroblast growth factor 23	rs12040241	T	C	0.6194	0.0259	0.0044	3.95e-09	0.0082	0.0111	0.4614	158.252
MDD	fibroblast growth factor 23	rs12123067	A	G	0.4218	0.0229	0.0043	1.01e-07	-0.0043	0.0114	0.707801	127.979
MDD	fibroblast growth factor 23	rs12125521	T	C	0.7117	0.0221	0.0048	4.14e-06	-0.0051	0.0115	0.658801	100.273
MDD	fibroblast growth factor 23	rs12160976	A	G	0.3399	-0.0243	0.0047	2.34e-07	-0.003	0.0122	0.8034	132.574
MDD	fibroblast growth factor 23	rs12487069	A	G	0.5623	-0.0202	0.0043	2.63e-06	0.0002	0.0108	0.9823	100.486
MDD	fibroblast growth factor 23	rs12513440	A	G	0.2432	0.0226	0.005	6.18e-06	-0.0039	0.0135	0.772999	94.062
MDD	fibroblast growth factor 23	rs12526217	T	C	0.8774	0.0344	0.0066	1.87e-07	0.0165	0.0153	0.2821	127.376
MDD	fibroblast growth factor 23	rs12542837	T	C	0.6118	-0.0207	0.0044	2.54e-06	0.0042	0.011	0.7012	101.828
MDD	fibroblast growth factor 23	rs12547021	T	C	0.2612	0.0234	0.0049	1.79e-06	0.0152	0.0119	0.2007	105.729
MDD	fibroblast growth factor 23	rs12589834	A	G	0.7443	0.027	0.0051	1.2e-07	0.0171	0.0141	0.2246	138.835
MDD	fibroblast growth factor 23	rs12615271	A	G	0.2818	-0.0223	0.0048	3.39e-06	0.0206	0.0125	0.1002	100.706
MDD	fibroblast growth factor 23	rs12619197	A	G	0.4515	0.0233	0.0043	6.01e-08	-0.0104	0.0105	0.3208	134.535
MDD	fibroblast growth factor 23	rs12627769	A	G	0.1914	-0.0258	0.0055	2.72e-06	0.0108	0.0131	0.4092	103.08
MDD	fibroblast growth factor 23	rs12631196	A	G	0.4226	0.0241	0.0044	4.32e-08	-0.0068	0.0104	0.5133	141.819
MDD	fibroblast growth factor 23	rs12661596	A	G	0.7646	0.0254	0.0051	6.35e-07	0.0128	0.013	0.3245	116.193
MDD	fibroblast growth factor 23	rs12919291	C	G	0.1884	0.0327	0.0055	2.76e-09	-0.0017	0.0141	0.901	163.618
MDD	fibroblast growth factor 23	rs12935276	T	G	0.741	-0.026	0.005	1.99e-07	0.017	0.0128	0.1841	129.822
MDD	fibroblast growth factor 23	rs12962980	C	G	0.1899	-0.0249	0.0055	5.97e-06	-0.011	0.0134	0.4121	95.4369
MDD	fibroblast growth factor 23	rs12967143	C	G	0.7012	-0.0345	0.0047	2.13e-13	0.0201	0.0113	0.0740304	249.602
MDD	fibroblast growth factor 23	rs12967855	A	G	0.3303	0.0294	0.0046	1.64e-10	-0.0071	0.012	0.551501	191.347
MDD	fibroblast growth factor 23	rs1364854	T	C	0.4884	-0.0194	0.0043	6.43e-06	0.0292	0.0113	0.0101	94.0941
MDD	fibroblast growth factor 23	rs1414622	T	C	0.9222	0.0408	0.008	3.4e-07	-0.0322	0.0213	0.1301	119.509
MDD	fibroblast growth factor 23	rs1461225	T	G	0.7525	0.0227	0.005	5.63e-06	0.0057	0.0133	0.668399	96.0258
MDD	fibroblast growth factor 23	rs146724204	A	G	0.0208	-0.0711	0.0159	7.76e-06	0.0049	0.0448	0.9125	103.023
MDD	fibroblast growth factor 23	rs1477272	T	C	0.54	0.0203	0.0044	3.96e-06	0.0005	0.0103	0.962	102.424
MDD	fibroblast growth factor 23	rs148065028	T	C	0.989	-0.118	0.0253	3.1e-06	0.0423	0.0556	0.4469	151.585
MDD	fibroblast growth factor 23	rs150346963	T	C	0.4118	0.0283	0.0044	1.26e-10	-0.0046	0.011	0.6758	194.144
MDD	fibroblast growth factor 23	rs150586937	A	C	0.0104	-0.1074	0.0224	1.63e-06	-0.0934	0.0661	0.1577	118.789
MDD	fibroblast growth factor 23	rs1512547	A	G	0.3125	-0.0231	0.0047	8.88e-07	-0.0053	0.0116	0.645601	114.714
MDD	fibroblast growth factor 23	rs1530310	A	G	0.6993	0.0221	0.0047	2.57e-06	-0.0002	0.0115	0.9851	102.764
MDD	fibroblast growth factor 23	rs168785	T	C	0.7581	0.0239	0.005	1.75e-06	0.0151	0.0131	0.2484	104.814
MDD	fibroblast growth factor 23	rs184439804	A	G	0.9134	0.0365	0.0081	6.6e-06	-0.01	0.0219	0.647	105.445
MDD	fibroblast growth factor 23	rs1862743	A	C	0.4941	-0.0214	0.0043	6.47e-07	0.0033	0.0115	0.771299	114.545
MDD	fibroblast growth factor 23	rs1908953	T	G	0.447	-0.0222	0.0044	4.52e-07	-0.0123	0.0108	0.2553	121.903
MDD	fibroblast growth factor 23	rs1931388	A	G	0.5958	0.0295	0.0044	2.02e-11	0.0168	0.0112	0.1329	209.746
MDD	fibroblast growth factor 23	rs1950829	A	G	0.4827	0.0297	0.0043	4.95e-12	-0.0139	0.011	0.2079	220.442
MDD	fibroblast growth factor 23	rs1955596	T	C	0.9275	-0.0398	0.0084	2.16e-06	0.0319	0.0241	0.1847	106.581
MDD	fibroblast growth factor 23	rs198457	T	C	0.1886	-0.0315	0.0056	1.86e-08	-0.0109	0.0143	0.4445	151.95
MDD	fibroblast growth factor 23	rs2111592	A	G	0.3141	0.0263	0.0046	1.08e-08	-0.0094	0.0116	0.4198	149.122
MDD	fibroblast growth factor 23	rs2132342	A	G	0.4021	-0.0223	0.0044	4.02e-07	0.0016	0.0114	0.8889	119.632
MDD	fibroblast growth factor 23	rs2134025	A	G	0.2298	0.0253	0.0052	1.14e-06	-0.0178	0.0136	0.1912	113.361
MDD	fibroblast growth factor 23	rs2214123	A	G	0.3534	0.0261	0.0045	6.63e-09	-0.0026	0.0109	0.8135	155.772
MDD	fibroblast growth factor 23	rs2225434	T	C	0.4341	-0.0224	0.0045	6.43e-07	-0.0068	0.0107	0.526	123.34
MDD	fibroblast growth factor 23	rs2237738	A	G	0.6224	0.0206	0.0044	2.84e-06	0.0019	0.013	0.8863	99.7915
MDD	fibroblast growth factor 23	rs2246221	A	G	0.5018	0.0219	0.0043	3.52e-07	0.0055	0.0112	0.6193	119.977
MDD	fibroblast growth factor 23	rs2394259	T	C	0.4187	0.0231	0.0044	1.52e-07	-0.0017	0.0118	0.8851	129.96
MDD	fibroblast growth factor 23	rs2418449	T	C	0.719	0.0281	0.0048	4.79e-09	0.0163	0.0124	0.1876	159.646
MDD	fibroblast growth factor 23	rs2488389	A	G	0.2179	-0.0295	0.0052	1.4e-08	0.0075	0.0129	0.5593	148.41
MDD	fibroblast growth factor 23	rs2568958	A	G	0.6042	0.0382	0.0044	3.89e-18	0.0014	0.0105	0.892	349.347
MDD	fibroblast growth factor 23	rs2582954	T	C	0.4005	-0.0222	0.0044	4.52e-07	0.0129	0.011	0.2434	118.405
MDD	fibroblast growth factor 23	rs2686340	T	C	0.1985	0.0256	0.0054	2.13e-06	0.0098	0.0136	0.4702	104.329
MDD	fibroblast growth factor 23	rs28541419	C	G	0.7692	0.0292	0.0052	1.96e-08	-0.0035	0.0141	0.8028	151.476
MDD	fibroblast growth factor 23	rs2888566	T	C	0.8489	-0.0285	0.006	2.03e-06	-0.0023	0.0168	0.8894	104.249
MDD	fibroblast growth factor 23	rs30266	A	G	0.3271	0.0366	0.0046	1.77e-15	0.0142	0.011	0.1962	295.135
MDD	fibroblast growth factor 23	rs3099439	T	C	0.5351	-0.0241	0.0043	2.09e-08	-0.001	0.0105	0.9234	144.586
MDD	fibroblast growth factor 23	rs34232444	T	C	0.6556	-0.0216	0.0046	2.66e-06	-0.0155	0.0117	0.1838	105.408
MDD	fibroblast growth factor 23	rs34947393	C	G	0.0296	-0.0605	0.013	3.26e-06	-0.0267	0.0362	0.4607	105.2
MDD	fibroblast growth factor 23	rs35377763	A	G	0.521	-0.0203	0.0043	2.35e-06	0.0043	0.0106	0.6862	102.902
MDD	fibroblast growth factor 23	rs35553410	T	C	0.7451	-0.0249	0.0049	3.74e-07	-0.0124	0.0129	0.3378	117.83
MDD	fibroblast growth factor 23	rs3807865	A	G	0.4105	0.031	0.0044	1.85e-12	0.0188	0.0109	0.0847501	232.752
MDD	fibroblast growth factor 23	rs3843487	T	G	0.0704	-0.0413	0.0084	8.8e-07	0.0399	0.0211	0.05873	111.696
MDD	fibroblast growth factor 23	rs3905238	A	G	0.588	0.0236	0.0045	1.57e-07	-0.0238	0.0114	0.0363003	135.016
MDD	fibroblast growth factor 23	rs4141983	T	C	0.674	0.0264	0.0046	9.52e-09	-0.0128	0.0112	0.2509	153.246
MDD	fibroblast growth factor 23	rs42858	A	T	0.2296	0.0244	0.0052	2.7e-06	0.0157	0.0141	0.2645	105.373
MDD	fibroblast growth factor 23	rs4404022	A	T	0.5884	-0.0204	0.0044	3.55e-06	0.0074	0.0112	0.5132	100.848
MDD	fibroblast growth factor 23	rs4655127	A	G	0.8144	-0.0248	0.0056	9.49e-06	-0.0019	0.0149	0.9008	93.0188
MDD	fibroblast growth factor 23	rs4707630	T	C	0.2592	0.0225	0.0049	4.39e-06	0.005	0.0116	0.6672	97.265
MDD	fibroblast growth factor 23	rs4719771	T	C	0.8818	-0.0298	0.0067	8.68e-06	0.0057	0.0153	0.7105	92.6129
MDD	fibroblast growth factor 23	rs4735241	A	G	0.5607	0.0209	0.0044	2.03e-06	-0.0049	0.0115	0.667699	107.659
MDD	fibroblast growth factor 23	rs4772087	T	C	0.3766	0.0213	0.0045	2.21e-06	0.0171	0.012	0.1553	106.579
MDD	fibroblast growth factor 23	rs4776768	T	C	0.283	-0.0252	0.0048	1.52e-07	-0.0119	0.0121	0.3261	128.941
MDD	fibroblast growth factor 23	rs4895718	T	C	0.6656	-0.0224	0.0045	6.43e-07	-0.0171	0.0108	0.1148	111.749
MDD	fibroblast growth factor 23	rs4938021	T	C	0.622	0.0278	0.0044	2.65e-10	-0.0026	0.0107	0.8116	181.845
MDD	fibroblast growth factor 23	rs4971040	A	C	0.1604	-0.0286	0.0059	1.25e-06	-0.0057	0.0144	0.693201	110.224
MDD	fibroblast growth factor 23	rs508502	T	C	0.2992	-0.0264	0.0048	3.8e-08	-0.0086	0.0129	0.5037	146.238
MDD	fibroblast growth factor 23	rs537362	C	G	0.9068	-0.033	0.0074	8.22e-06	0.0159	0.0177	0.37	92.0887
MDD	fibroblast growth factor 23	rs547492	A	G	0.553	-0.0202	0.0043	2.63e-06	0.011	0.0107	0.3045	100.924
MDD	fibroblast growth factor 23	rs55897719	A	C	0.3153	0.0255	0.0046	2.97e-08	0.0204	0.0126	0.1048	140.475
MDD	fibroblast growth factor 23	rs55908506	A	C	0.9199	0.0397	0.008	6.96e-07	0.0183	0.0176	0.2977	116.205
MDD	fibroblast growth factor 23	rs56115484	T	C	0.1988	-0.0245	0.0054	5.71e-06	0.0035	0.0134	0.7951	95.6629
MDD	fibroblast growth factor 23	rs56211578	A	C	0.8467	-0.0275	0.006	4.58e-06	0.0006	0.0162	0.9686	98.2185
MDD	fibroblast growth factor 23	rs5771864	T	C	0.4305	0.0202	0.0044	4.41e-06	-0.013	0.0114	0.2554	100.099
MDD	fibroblast growth factor 23	rs578174	A	G	0.8948	0.0364	0.0072	4.29e-07	0.0017	0.0201	0.9316	124.803
MDD	fibroblast growth factor 23	rs590503	T	C	0.9037	0.0416	0.0073	1.21e-08	-0.0039	0.0161	0.8073	150.709
MDD	fibroblast growth factor 23	rs59082935	T	C	0.1342	0.0363	0.0066	3.8e-08	-0.0042	0.0177	0.8144	153.21
MDD	fibroblast growth factor 23	rs59283172	A	G	0.1081	-0.039	0.007	2.53e-08	-0.0158	0.0176	0.3674	146.747
MDD	fibroblast growth factor 23	rs60157091	T	C	0.5126	0.0215	0.0043	5.73e-07	-0.019	0.0105	0.0701795	115.561
MDD	fibroblast growth factor 23	rs61001062	A	G	0.1162	0.0349	0.0067	1.9e-07	0.0208	0.0175	0.2343	125.167
MDD	fibroblast growth factor 23	rs62419352	A	G	0.9721	-0.0631	0.014	6.57e-06	0.0043	0.0405	0.9154	108.053
MDD	fibroblast growth factor 23	rs62535714	A	G	0.1639	0.0339	0.0058	5.07e-09	0.0107	0.014	0.4417	157.596
MDD	fibroblast growth factor 23	rs6429297	A	G	0.4802	-0.0191	0.0043	8.92e-06	-0.0035	0.0109	0.748201	91.112
MDD	fibroblast growth factor 23	rs6449561	C	G	0.2238	0.0242	0.0052	3.26e-06	-0.0206	0.0139	0.1381	101.794
MDD	fibroblast growth factor 23	rs6479487	T	G	0.8436	-0.0296	0.0059	5.25e-07	0.009	0.0147	0.5394	115.672
MDD	fibroblast growth factor 23	rs6479744	T	C	0.5112	0.0209	0.0043	1.17e-06	0.0124	0.0116	0.2855	109.215
MDD	fibroblast growth factor 23	rs6493274	A	C	0.7881	-0.0268	0.0052	2.55e-07	-0.0163	0.0134	0.2247	120.021
MDD	fibroblast growth factor 23	rs6508230	T	C	0.4343	0.0227	0.0044	2.48e-07	-0.0041	0.0111	0.710901	126.68
MDD	fibroblast growth factor 23	rs6553965	A	G	0.6676	-0.0222	0.0046	1.39e-06	0.0198	0.0121	0.1013	109.433
MDD	fibroblast growth factor 23	rs6583791	A	G	0.1646	0.0282	0.006	2.6e-06	-0.0199	0.0157	0.2055	109.418
MDD	fibroblast growth factor 23	rs6602459	C	G	0.7395	-0.0236	0.0051	3.7e-06	0.0164	0.0129	0.2022	107.358
MDD	fibroblast growth factor 23	rs6606679	T	C	0.3392	-0.024	0.0046	1.81e-07	0.0131	0.0109	0.2289	129.191
MDD	fibroblast growth factor 23	rs66511648	T	C	0.716	-0.0297	0.0048	6.11e-10	0.0128	0.012	0.2852	179.503
MDD	fibroblast growth factor 23	rs6656912	T	C	0.4273	-0.0252	0.0043	4.62e-09	-0.0182	0.0109	0.0950211	155.513
MDD	fibroblast growth factor 23	rs67303470	A	G	0.8996	0.0362	0.0078	3.47e-06	-0.0272	0.0215	0.2055	118.433
MDD	fibroblast growth factor 23	rs67436663	C	G	0.2378	-0.0258	0.0052	6.99e-07	-0.0114	0.0127	0.3697	120.725
MDD	fibroblast growth factor 23	rs6746122	A	G	0.3405	0.0226	0.0046	8.97e-07	0.0035	0.0124	0.7758	114.768
MDD	fibroblast growth factor 23	rs67767662	T	G	0.799	-0.0248	0.0054	4.38e-06	-0.0018	0.0125	0.8854	98.8333
MDD	fibroblast growth factor 23	rs67981811	C	G	0.8944	0.062	0.007	8.21e-19	-0.0286	0.0184	0.1193	363.468
MDD	fibroblast growth factor 23	rs6828427	T	C	0.7805	0.0232	0.0052	8.14e-06	-0.0003	0.0136	0.9833	92.2645
MDD	fibroblast growth factor 23	rs6846784	T	C	0.619	-0.0209	0.0044	2.03e-06	-0.0097	0.0116	0.4053	103.079
MDD	fibroblast growth factor 23	rs7046881	T	G	0.5782	0.021	0.0044	1.82e-06	0.0075	0.0118	0.522001	107.619
MDD	fibroblast growth factor 23	rs7098208	T	C	0.2482	0.0239	0.0052	4.3e-06	-0.01	0.0113	0.3764	106.651
MDD	fibroblast growth factor 23	rs7152906	T	C	0.4804	-0.0258	0.0043	1.97e-09	-0.015	0.0104	0.1486	166.275
MDD	fibroblast growth factor 23	rs71639293	A	G	0.7979	0.0291	0.0054	7.09e-08	0.01	0.0144	0.49	136.644
MDD	fibroblast growth factor 23	rs7241572	A	G	0.2047	0.0323	0.0054	2.21e-09	-0.0096	0.0152	0.5274	169.97
MDD	fibroblast growth factor 23	rs72737061	T	C	0.9325	-0.0438	0.0086	3.52e-07	-0.0137	0.0221	0.5342	120.831
MDD	fibroblast growth factor 23	rs73225543	T	C	0.0596	0.0443	0.0093	1.9e-06	0.037	0.0249	0.1375	110.061
MDD	fibroblast growth factor 23	rs73350816	A	G	0.1665	-0.0265	0.0059	7.07e-06	0.0031	0.0151	0.8362	97.5141
MDD	fibroblast growth factor 23	rs74927570	T	G	0.8236	-0.0253	0.0056	6.25e-06	-0.0035	0.0131	0.7892	93.0482
MDD	fibroblast growth factor 23	rs7502539	A	G	0.34	-0.0229	0.0046	6.42e-07	-0.0282	0.0118	0.01692	117.752
MDD	fibroblast growth factor 23	rs754287	A	T	0.3664	-0.0289	0.0045	1.34e-10	0.002	0.0107	0.8517	194.047
MDD	fibroblast growth factor 23	rs7551758	T	G	0.4671	-0.0283	0.0043	4.66e-11	-0.014	0.0104	0.1803	199.514
MDD	fibroblast growth factor 23	rs7564151	C	G	0.3921	-0.0236	0.0044	8.16e-08	0.0064	0.0108	0.5521	132.843
MDD	fibroblast growth factor 23	rs7584419	A	C	0.3451	0.0211	0.0045	2.75e-06	-0.0008	0.0106	0.9386	100.68
MDD	fibroblast growth factor 23	rs75889584	A	G	0.9857	-0.0919	0.0202	5.38e-06	-0.0186	0.05	0.7094	119.12
MDD	fibroblast growth factor 23	rs76227152	A	C	0.9551	0.0518	0.0104	6.33e-07	0.0259	0.0267	0.3323	115.14
MDD	fibroblast growth factor 23	rs76812845	A	T	0.9791	-0.0716	0.015	1.81e-06	-0.0126	0.0398	0.752199	104.969
MDD	fibroblast growth factor 23	rs7721129	A	G	0.5343	0.029	0.0043	1.54e-11	-0.0022	0.0113	0.8469	209.431
MDD	fibroblast growth factor 23	rs77579223	T	C	0.2536	-0.0251	0.005	5.17e-07	0.0153	0.0128	0.2325	119.328
MDD	fibroblast growth factor 23	rs7758630	A	T	0.4046	-0.0229	0.0044	1.94e-07	-0.0103	0.0106	0.3313	126.411
MDD	fibroblast growth factor 23	rs779	A	G	0.8831	-0.0311	0.0068	4.8e-06	0.0003	0.0188	0.9883	99.9086
MDD	fibroblast growth factor 23	rs7797112	T	C	0.7467	0.027	0.0049	3.58e-08	-0.0111	0.0114	0.3316	137.975
MDD	fibroblast growth factor 23	rs780025	T	G	0.3428	0.0239	0.0046	2.04e-07	-0.0057	0.0127	0.653899	128.771
MDD	fibroblast growth factor 23	rs7842361	T	C	0.1372	-0.0325	0.0063	2.49e-07	-0.0191	0.0149	0.2013	125.115
MDD	fibroblast growth factor 23	rs8015283	A	G	0.1253	0.0304	0.0065	2.91e-06	0.0082	0.0162	0.6145	101.348
MDD	fibroblast growth factor 23	rs843812	A	G	0.4117	0.0248	0.0044	1.74e-08	-0.0244	0.0106	0.0210199	149.068
MDD	fibroblast growth factor 23	rs905111	A	G	0.2866	0.0219	0.0048	5.05e-06	0.0155	0.0121	0.2016	98.1192
MDD	fibroblast growth factor 23	rs9074	A	G	0.2597	0.031	0.0049	2.51e-10	-0.0043	0.0118	0.714801	184.899
MDD	fibroblast growth factor 23	rs908639	T	C	0.1979	-0.0242	0.0054	7.41e-06	0.0038	0.0131	0.770501	93.0158
MDD	fibroblast growth factor 23	rs9307085	T	C	0.9097	0.0384	0.0076	4.36e-07	-0.0091	0.0201	0.6519	121.206
MDD	fibroblast growth factor 23	rs9364755	A	G	0.7738	-0.0283	0.0051	2.87e-08	-0.0058	0.0134	0.6647	140.277
MDD	fibroblast growth factor 23	rs9529314	A	G	0.2028	-0.0335	0.0053	2.6e-10	-0.0079	0.0132	0.5508	181.574
MDD	fibroblast growth factor 23	rs9538160	A	G	0.3673	-0.0225	0.0045	5.73e-07	0.0123	0.0106	0.2466	117.722
MDD	fibroblast growth factor 23	rs9596774	T	C	0.3261	0.0255	0.0046	2.97e-08	0.0208	0.012	0.0840195	142.995
MDD	fibroblast growth factor 23	rs9825208	T	G	0.4454	-0.0204	0.0043	2.09e-06	0.0142	0.0103	0.1654	102.861
MDD	fibroblast growth factor 23	rs9920233	A	C	0.4686	-0.0202	0.0043	2.63e-06	-0.0171	0.0114	0.1316	101.668
MDD	Parathyroid hormone	rs1001138	C	G	0.2782	0.0221	0.0048	4.14e-06	0.0306	0.0277	0.269153	98.1329
MDD	Parathyroid hormone	rs10105127	T	C	0.3522	-0.0211	0.0045	2.75e-06	-0.0089	0.0263	0.74131	101.638
MDD	Parathyroid hormone	rs1016165	T	C	0.5644	0.0221	0.0044	5.09e-07	0.0104	0.025	0.676083	120.153
MDD	Parathyroid hormone	rs1021363	A	G	0.3566	0.03	0.0045	2.62e-11	-0.0182	0.0262	0.489779	206.66
MDD	Parathyroid hormone	rs10415547	T	C	0.253	-0.0231	0.005	3.84e-06	0.0144	0.0286	0.616595	100.908
MDD	Parathyroid hormone	rs10501696	A	G	0.5052	0.0295	0.0044	2.02e-11	-0.0097	0.0251	0.707946	217.719
MDD	Parathyroid hormone	rs10747480	A	G	0.5246	0.0207	0.0044	2.54e-06	-0.0507	0.0246	0.0389045	106.928
MDD	Parathyroid hormone	rs10755215	T	C	0.4324	0.0225	0.0043	1.67e-07	0.0249	0.0247	0.30903	124.329
MDD	Parathyroid hormone	rs10767735	C	G	0.3979	-0.0234	0.0044	1.05e-07	0.0054	0.0255	0.831764	131.268
MDD	Parathyroid hormone	rs10818865	A	G	0.7895	-0.0252	0.0053	1.99e-06	-0.0018	0.031	0.954993	105.601
MDD	Parathyroid hormone	rs10833984	A	G	0.5963	-0.0198	0.0045	1.08e-05	-0.0384	0.0254	0.128825	94.4293
MDD	Parathyroid hormone	rs10931670	T	G	0.7244	-0.0218	0.0048	5.58e-06	-0.0158	0.0281	0.57544	94.9345
MDD	Parathyroid hormone	rs10961649	T	C	0.3209	0.023	0.0046	5.73e-07	0.0174	0.0267	0.512861	115.353
MDD	Parathyroid hormone	rs111605708	A	T	0.9589	0.0524	0.0113	3.53e-06	-0.0678	0.0655	0.301995	108.279
MDD	Parathyroid hormone	rs1116690	A	G	0.2515	-0.025	0.005	5.73e-07	0.0494	0.0281	0.0794328	117.729
MDD	Parathyroid hormone	rs111750830	A	G	0.084	0.0358	0.0078	4.44e-06	-0.0633	0.0476	0.18197	98.6728
MDD	Parathyroid hormone	rs11220798	T	C	0.0718	0.0401	0.0083	1.36e-06	-0.0931	0.0497	0.060256	107.231
MDD	Parathyroid hormone	rs11250015	A	G	0.1893	0.0291	0.0055	1.22e-07	0.0278	0.0318	0.380189	130.041
MDD	Parathyroid hormone	rs112844822	T	C	0.0315	0.0651	0.0128	3.66e-07	-0.0906	0.0738	0.218776	129.377
MDD	Parathyroid hormone	rs113039421	A	G	0.178	-0.0257	0.0056	4.45e-06	-0.0174	0.0317	0.588844	96.697
MDD	Parathyroid hormone	rs114857023	T	C	0.033	0.0683	0.0119	9.5e-09	-0.0307	0.0752	0.676083	148.964
MDD	Parathyroid hormone	rs11577530	T	C	0.1859	0.0271	0.0055	8.34e-07	-0.0024	0.0323	0.933254	111.215
MDD	Parathyroid hormone	rs11612312	T	C	0.7965	-0.0309	0.0054	1.05e-08	-0.0265	0.0315	0.398107	154.872
MDD	Parathyroid hormone	rs11755188	T	C	0.0609	0.0429	0.0093	3.97e-06	0.0132	0.0506	0.794328	105.319
MDD	Parathyroid hormone	rs117987599	A	T	0.0118	0.145	0.0297	1.05e-06	0.328	0.1274	0.01	245.384
MDD	Parathyroid hormone	rs11826373	T	C	0.8089	-0.0248	0.0055	6.51e-06	-0.0388	0.0319	0.223872	95.1289
MDD	Parathyroid hormone	rs11850030	C	G	0.8195	-0.027	0.0056	1.43e-06	0.0456	0.0317	0.151356	107.899
MDD	Parathyroid hormone	rs12040241	T	C	0.6194	0.0259	0.0044	3.95e-09	0.0061	0.0256	0.812831	158.252
MDD	Parathyroid hormone	rs12123067	A	G	0.4218	0.0229	0.0043	1.01e-07	-0.0319	0.0247	0.199526	127.979
MDD	Parathyroid hormone	rs12125521	T	C	0.7117	0.0221	0.0048	4.14e-06	-0.0134	0.0275	0.630957	100.273
MDD	Parathyroid hormone	rs12160976	A	G	0.3399	-0.0243	0.0047	2.34e-07	0.0091	0.0263	0.724436	132.574
MDD	Parathyroid hormone	rs12487069	A	G	0.5623	-0.0202	0.0043	2.63e-06	0.0057	0.0251	0.812831	100.486
MDD	Parathyroid hormone	rs12513440	A	G	0.2432	0.0226	0.005	6.18e-06	-0.042	0.0288	0.144544	94.062
MDD	Parathyroid hormone	rs12526217	T	C	0.8774	0.0344	0.0066	1.87e-07	-0.0621	0.0368	0.0912011	127.376
MDD	Parathyroid hormone	rs12542837	T	C	0.6118	-0.0207	0.0044	2.54e-06	-0.0169	0.0253	0.501187	101.828
MDD	Parathyroid hormone	rs12547021	T	C	0.2612	0.0234	0.0049	1.79e-06	0.0231	0.0282	0.416869	105.729
MDD	Parathyroid hormone	rs12589834	A	G	0.7443	0.027	0.0051	1.2e-07	-0.0048	0.0293	0.870964	138.835
MDD	Parathyroid hormone	rs12615271	A	G	0.2818	-0.0223	0.0048	3.39e-06	-0.0702	0.0278	0.0114815	100.706
MDD	Parathyroid hormone	rs12619197	A	G	0.4515	0.0233	0.0043	6.01e-08	-0.0125	0.0252	0.616595	134.535
MDD	Parathyroid hormone	rs12627769	A	G	0.1914	-0.0258	0.0055	2.72e-06	0.0221	0.0309	0.47863	103.08
MDD	Parathyroid hormone	rs12631196	A	G	0.4226	0.0241	0.0044	4.32e-08	-0.0417	0.0248	0.0933254	141.819
MDD	Parathyroid hormone	rs12661596	A	G	0.7646	0.0254	0.0051	6.35e-07	-0.0365	0.0289	0.20893	116.193
MDD	Parathyroid hormone	rs12919291	C	G	0.1884	0.0327	0.0055	2.76e-09	0.026	0.0314	0.40738	163.618
MDD	Parathyroid hormone	rs12935276	T	G	0.741	-0.026	0.005	1.99e-07	0.0153	0.0278	0.588844	129.822
MDD	Parathyroid hormone	rs12962980	C	G	0.1899	-0.0249	0.0055	5.97e-06	-0.0974	0.0313	0.0018197	95.4369
MDD	Parathyroid hormone	rs12967143	C	G	0.7012	-0.0345	0.0047	2.13e-13	-0.014	0.027	0.60256	249.602
MDD	Parathyroid hormone	rs12967855	A	G	0.3303	0.0294	0.0046	1.64e-10	0.0355	0.0267	0.18197	191.347
MDD	Parathyroid hormone	rs1414622	T	C	0.9222	0.0408	0.008	3.4e-07	-0.038	0.0453	0.398107	119.509
MDD	Parathyroid hormone	rs1461225	T	G	0.7525	0.0227	0.005	5.63e-06	-0.0019	0.0285	0.954993	96.0258
MDD	Parathyroid hormone	rs146724204	A	G	0.0208	-0.0711	0.0159	7.76e-06	0.0565	0.0825	0.489779	103.023
MDD	Parathyroid hormone	rs1477272	T	C	0.54	0.0203	0.0044	3.96e-06	-0.0114	0.0245	0.645654	102.424
MDD	Parathyroid hormone	rs150346963	T	C	0.4118	0.0283	0.0044	1.26e-10	0.0141	0.0251	0.57544	194.144
MDD	Parathyroid hormone	rs150586937	A	C	0.0104	-0.1074	0.0224	1.63e-06	-0.1674	0.1171	0.151356	118.789
MDD	Parathyroid hormone	rs1512547	A	G	0.3125	-0.0231	0.0047	8.88e-07	-0.0367	0.0271	0.177828	114.714
MDD	Parathyroid hormone	rs1530310	A	G	0.6993	0.0221	0.0047	2.57e-06	0.0056	0.027	0.831764	102.764
MDD	Parathyroid hormone	rs168785	T	C	0.7581	0.0239	0.005	1.75e-06	-0.0037	0.0277	0.891251	104.814
MDD	Parathyroid hormone	rs184439804	A	G	0.9134	0.0365	0.0081	6.6e-06	-0.0145	0.0447	0.74131	105.445
MDD	Parathyroid hormone	rs1862743	A	C	0.4941	-0.0214	0.0043	6.47e-07	0.0253	0.0253	0.316228	114.545
MDD	Parathyroid hormone	rs1908953	T	G	0.447	-0.0222	0.0044	4.52e-07	0	0.0255	1	121.903
MDD	Parathyroid hormone	rs1931388	A	G	0.5958	0.0295	0.0044	2.02e-11	0.0277	0.0253	0.275423	209.746
MDD	Parathyroid hormone	rs1950829	A	G	0.4827	0.0297	0.0043	4.95e-12	-0.0053	0.0246	0.831764	220.442
MDD	Parathyroid hormone	rs1955596	T	C	0.9275	-0.0398	0.0084	2.16e-06	-0.0386	0.0473	0.416869	106.581
MDD	Parathyroid hormone	rs198457	T	C	0.1886	-0.0315	0.0056	1.86e-08	0.0218	0.0322	0.501187	151.95
MDD	Parathyroid hormone	rs2111592	A	G	0.3141	0.0263	0.0046	1.08e-08	0.0055	0.027	0.831764	149.122
MDD	Parathyroid hormone	rs2132342	A	G	0.4021	-0.0223	0.0044	4.02e-07	-0.0385	0.0253	0.128825	119.632
MDD	Parathyroid hormone	rs2134025	A	G	0.2298	0.0253	0.0052	1.14e-06	0.005	0.031	0.870964	113.361
MDD	Parathyroid hormone	rs2214123	A	G	0.3534	0.0261	0.0045	6.63e-09	-0.0056	0.0261	0.831764	155.772
MDD	Parathyroid hormone	rs2225434	T	C	0.4341	-0.0224	0.0045	6.43e-07	-0.0182	0.0252	0.467735	123.34
MDD	Parathyroid hormone	rs2237738	A	G	0.6224	0.0206	0.0044	2.84e-06	0.0124	0.0257	0.630957	99.7915
MDD	Parathyroid hormone	rs2246221	A	G	0.5018	0.0219	0.0043	3.52e-07	-0.0186	0.0247	0.457088	119.977
MDD	Parathyroid hormone	rs2394259	T	C	0.4187	0.0231	0.0044	1.52e-07	0.0057	0.0253	0.812831	129.96
MDD	Parathyroid hormone	rs2418449	T	C	0.719	0.0281	0.0048	4.79e-09	-0.0355	0.0271	0.190546	159.646
MDD	Parathyroid hormone	rs2488389	A	G	0.2179	-0.0295	0.0052	1.4e-08	-0.0225	0.0299	0.446684	148.41
MDD	Parathyroid hormone	rs2568958	A	G	0.6042	0.0382	0.0044	3.89e-18	0.0049	0.0255	0.851138	349.347
MDD	Parathyroid hormone	rs2582954	T	C	0.4005	-0.0222	0.0044	4.52e-07	-0.0214	0.026	0.40738	118.405
MDD	Parathyroid hormone	rs2686340	T	C	0.1985	0.0256	0.0054	2.13e-06	0.0132	0.031	0.676083	104.329
MDD	Parathyroid hormone	rs28541419	C	G	0.7692	0.0292	0.0052	1.96e-08	0.0092	0.0307	0.758578	151.476
MDD	Parathyroid hormone	rs2888566	T	C	0.8489	-0.0285	0.006	2.03e-06	-0.0423	0.0351	0.229087	104.249
MDD	Parathyroid hormone	rs30266	A	G	0.3271	0.0366	0.0046	1.77e-15	0.0176	0.0268	0.512861	295.135
MDD	Parathyroid hormone	rs3099439	T	C	0.5351	-0.0241	0.0043	2.09e-08	0.004	0.0254	0.870964	144.586
MDD	Parathyroid hormone	rs34232444	T	C	0.6556	-0.0216	0.0046	2.66e-06	-0.028	0.026	0.281838	105.408
MDD	Parathyroid hormone	rs34947393	C	G	0.0296	-0.0605	0.013	3.26e-06	-0.0027	0.0756	0.977237	105.2
MDD	Parathyroid hormone	rs35377763	A	G	0.521	-0.0203	0.0043	2.35e-06	-0.0324	0.0247	0.190546	102.902
MDD	Parathyroid hormone	rs35553410	T	C	0.7451	-0.0249	0.0049	3.74e-07	-0.0247	0.0283	0.380189	117.83
MDD	Parathyroid hormone	rs3807865	A	G	0.4105	0.031	0.0044	1.85e-12	-0.0498	0.0248	0.0446684	232.752
MDD	Parathyroid hormone	rs3843487	T	G	0.0704	-0.0413	0.0084	8.8e-07	0.039	0.049	0.426581	111.696
MDD	Parathyroid hormone	rs3905238	A	G	0.588	0.0236	0.0045	1.57e-07	0.0489	0.0258	0.057544	135.016
MDD	Parathyroid hormone	rs4141983	T	C	0.674	0.0264	0.0046	9.52e-09	0.0097	0.0272	0.724436	153.246
MDD	Parathyroid hormone	rs42858	A	T	0.2296	0.0244	0.0052	2.7e-06	0.0327	0.0302	0.281838	105.373
MDD	Parathyroid hormone	rs4404022	A	T	0.5884	-0.0204	0.0044	3.55e-06	0.0311	0.0251	0.213796	100.848
MDD	Parathyroid hormone	rs4655127	A	G	0.8144	-0.0248	0.0056	9.49e-06	-0.0078	0.0328	0.812831	93.0188
MDD	Parathyroid hormone	rs4707630	T	C	0.2592	0.0225	0.0049	4.39e-06	0.0469	0.0291	0.107152	97.265
MDD	Parathyroid hormone	rs4719771	T	C	0.8818	-0.0298	0.0067	8.68e-06	0.0605	0.0386	0.11749	92.6129
MDD	Parathyroid hormone	rs4735241	A	G	0.5607	0.0209	0.0044	2.03e-06	0.0186	0.025	0.457088	107.659
MDD	Parathyroid hormone	rs4772087	T	C	0.3766	0.0213	0.0045	2.21e-06	0.0042	0.0258	0.870964	106.579
MDD	Parathyroid hormone	rs4776768	T	C	0.283	-0.0252	0.0048	1.52e-07	0.0774	0.0278	0.00537032	128.941
MDD	Parathyroid hormone	rs4895718	T	C	0.6656	-0.0224	0.0045	6.43e-07	-0.013	0.0262	0.616595	111.749
MDD	Parathyroid hormone	rs4938021	T	C	0.622	0.0278	0.0044	2.65e-10	0.0033	0.0255	0.891251	181.845
MDD	Parathyroid hormone	rs4971040	A	C	0.1604	-0.0286	0.0059	1.25e-06	0.0223	0.0338	0.512861	110.224
MDD	Parathyroid hormone	rs508502	T	C	0.2992	-0.0264	0.0048	3.8e-08	-0.0169	0.0273	0.537032	146.238
MDD	Parathyroid hormone	rs537362	C	G	0.9068	-0.033	0.0074	8.22e-06	-0.0007	0.043	0.977237	92.0887
MDD	Parathyroid hormone	rs547492	A	G	0.553	-0.0202	0.0043	2.63e-06	-0.0208	0.0251	0.40738	100.924
MDD	Parathyroid hormone	rs55897719	A	C	0.3153	0.0255	0.0046	2.97e-08	0.0362	0.0265	0.17378	140.475
MDD	Parathyroid hormone	rs55908506	A	C	0.9199	0.0397	0.008	6.96e-07	0.011	0.0453	0.812831	116.205
MDD	Parathyroid hormone	rs56115484	T	C	0.1988	-0.0245	0.0054	5.71e-06	-0.0351	0.0301	0.245471	95.6629
MDD	Parathyroid hormone	rs56211578	A	C	0.8467	-0.0275	0.006	4.58e-06	-0.0003	0.0339	1	98.2185
MDD	Parathyroid hormone	rs5771864	T	C	0.4305	0.0202	0.0044	4.41e-06	-0.0312	0.0261	0.229087	100.099
MDD	Parathyroid hormone	rs578174	A	G	0.8948	0.0364	0.0072	4.29e-07	0.012	0.0414	0.776247	124.803
MDD	Parathyroid hormone	rs590503	T	C	0.9037	0.0416	0.0073	1.21e-08	-0.0763	0.043	0.0758578	150.709
MDD	Parathyroid hormone	rs59082935	T	C	0.1342	0.0363	0.0066	3.8e-08	-0.0343	0.0369	0.354813	153.21
MDD	Parathyroid hormone	rs59283172	A	G	0.1081	-0.039	0.007	2.53e-08	0.0483	0.039	0.213796	146.747
MDD	Parathyroid hormone	rs60157091	T	C	0.5126	0.0215	0.0043	5.73e-07	-0.007	0.0242	0.776247	115.561
MDD	Parathyroid hormone	rs61001062	A	G	0.1162	0.0349	0.0067	1.9e-07	-0.0004	0.038	1	125.167
MDD	Parathyroid hormone	rs62419352	A	G	0.9721	-0.0631	0.014	6.57e-06	-0.0391	0.0759	0.60256	108.053
MDD	Parathyroid hormone	rs62535714	A	G	0.1639	0.0339	0.0058	5.07e-09	0.0065	0.0331	0.851138	157.596
MDD	Parathyroid hormone	rs6429297	A	G	0.4802	-0.0191	0.0043	8.92e-06	-0.0153	0.0246	0.537032	91.112
MDD	Parathyroid hormone	rs6449561	C	G	0.2238	0.0242	0.0052	3.26e-06	0.0084	0.0301	0.776247	101.794
MDD	Parathyroid hormone	rs6479487	T	G	0.8436	-0.0296	0.0059	5.25e-07	-0.055	0.0349	0.114815	115.672
MDD	Parathyroid hormone	rs6479744	T	C	0.5112	0.0209	0.0043	1.17e-06	0.0114	0.0252	0.645654	109.215
MDD	Parathyroid hormone	rs6493274	A	C	0.7881	-0.0268	0.0052	2.55e-07	0.0755	0.0304	0.0131826	120.021
MDD	Parathyroid hormone	rs6508230	T	C	0.4343	0.0227	0.0044	2.48e-07	-0.0172	0.0248	0.489779	126.68
MDD	Parathyroid hormone	rs6553965	A	G	0.6676	-0.0222	0.0046	1.39e-06	-0.0287	0.0261	0.269153	109.433
MDD	Parathyroid hormone	rs6583791	A	G	0.1646	0.0282	0.006	2.6e-06	-0.0519	0.0346	0.131826	109.418
MDD	Parathyroid hormone	rs6602459	C	G	0.7395	-0.0236	0.0051	3.7e-06	-0.0228	0.0292	0.436516	107.358
MDD	Parathyroid hormone	rs6606679	T	C	0.3392	-0.024	0.0046	1.81e-07	-0.022	0.0264	0.40738	129.191
MDD	Parathyroid hormone	rs66511648	T	C	0.716	-0.0297	0.0048	6.11e-10	-0.0145	0.0273	0.60256	179.503
MDD	Parathyroid hormone	rs6656912	T	C	0.4273	-0.0252	0.0043	4.62e-09	-0.0121	0.0257	0.645654	155.513
MDD	Parathyroid hormone	rs67303470	A	G	0.8996	0.0362	0.0078	3.47e-06	0.0494	0.0461	0.281838	118.433
MDD	Parathyroid hormone	rs67436663	C	G	0.2378	-0.0258	0.0052	6.99e-07	0.0335	0.03	0.263027	120.725
MDD	Parathyroid hormone	rs6746122	A	G	0.3405	0.0226	0.0046	8.97e-07	0.0029	0.027	0.912011	114.768
MDD	Parathyroid hormone	rs67767662	T	G	0.799	-0.0248	0.0054	4.38e-06	-0.0009	0.0307	0.977237	98.8333
MDD	Parathyroid hormone	rs67981811	C	G	0.8944	0.062	0.007	8.21e-19	0.0463	0.0375	0.218776	363.468
MDD	Parathyroid hormone	rs6828427	T	C	0.7805	0.0232	0.0052	8.14e-06	0.0045	0.0301	0.870964	92.2645
MDD	Parathyroid hormone	rs6846784	T	C	0.619	-0.0209	0.0044	2.03e-06	-0.0031	0.0254	0.912011	103.079
MDD	Parathyroid hormone	rs7046881	T	G	0.5782	0.021	0.0044	1.82e-06	-0.0136	0.0249	0.588844	107.619
MDD	Parathyroid hormone	rs7098208	T	C	0.2482	0.0239	0.0052	4.3e-06	0.0283	0.0289	0.331131	106.651
MDD	Parathyroid hormone	rs7152906	T	C	0.4804	-0.0258	0.0043	1.97e-09	-0.001	0.0247	0.977237	166.275
MDD	Parathyroid hormone	rs71639293	A	G	0.7979	0.0291	0.0054	7.09e-08	-0.0408	0.0305	0.18197	136.644
MDD	Parathyroid hormone	rs7241572	A	G	0.2047	0.0323	0.0054	2.21e-09	0.0239	0.0319	0.457088	169.97
MDD	Parathyroid hormone	rs72737061	T	C	0.9325	-0.0438	0.0086	3.52e-07	-0.0036	0.0494	0.933254	120.831
MDD	Parathyroid hormone	rs73225543	T	C	0.0596	0.0443	0.0093	1.9e-06	0.0774	0.0549	0.158489	110.061
MDD	Parathyroid hormone	rs73350816	A	G	0.1665	-0.0265	0.0059	7.07e-06	0.0765	0.0344	0.0263027	97.5141
MDD	Parathyroid hormone	rs74927570	T	G	0.8236	-0.0253	0.0056	6.25e-06	0.0192	0.0317	0.549541	93.0482
MDD	Parathyroid hormone	rs7502539	A	G	0.34	-0.0229	0.0046	6.42e-07	-0.0352	0.0265	0.186209	117.752
MDD	Parathyroid hormone	rs754287	A	T	0.3664	-0.0289	0.0045	1.34e-10	-0.001	0.0261	0.977237	194.047
MDD	Parathyroid hormone	rs7551758	T	G	0.4671	-0.0283	0.0043	4.66e-11	0.0233	0.0246	0.338844	199.514
MDD	Parathyroid hormone	rs7564151	C	G	0.3921	-0.0236	0.0044	8.16e-08	-0.0056	0.0259	0.831764	132.843
MDD	Parathyroid hormone	rs7584419	A	C	0.3451	0.0211	0.0045	2.75e-06	0.0224	0.0258	0.389045	100.68
MDD	Parathyroid hormone	rs75889584	A	G	0.9857	-0.0919	0.0202	5.38e-06	-0.1249	0.1102	0.25704	119.12
MDD	Parathyroid hormone	rs7617480	A	C	0.2261	0.029	0.0051	1.3e-08	0.0061	0.0294	0.831764	147.258
MDD	Parathyroid hormone	rs76227152	A	C	0.9551	0.0518	0.0104	6.33e-07	-0.0021	0.0606	0.977237	115.14
MDD	Parathyroid hormone	rs76812845	A	T	0.9791	-0.0716	0.015	1.81e-06	-0.0565	0.0921	0.537032	104.969
MDD	Parathyroid hormone	rs7721129	A	G	0.5343	0.029	0.0043	1.54e-11	0.0074	0.0248	0.758578	209.431
MDD	Parathyroid hormone	rs77579223	T	C	0.2536	-0.0251	0.005	5.17e-07	-0.0004	0.0287	1	119.328
MDD	Parathyroid hormone	rs7758630	A	T	0.4046	-0.0229	0.0044	1.94e-07	-0.0026	0.0253	0.912011	126.411
MDD	Parathyroid hormone	rs779	A	G	0.8831	-0.0311	0.0068	4.8e-06	0.0399	0.039	0.30903	99.9086
MDD	Parathyroid hormone	rs7797112	T	C	0.7467	0.027	0.0049	3.58e-08	0.019	0.0284	0.501187	137.975
MDD	Parathyroid hormone	rs780025	T	G	0.3428	0.0239	0.0046	2.04e-07	0.0041	0.0265	0.870964	128.771
MDD	Parathyroid hormone	rs7842361	T	C	0.1372	-0.0325	0.0063	2.49e-07	0.0276	0.0369	0.457088	125.115
MDD	Parathyroid hormone	rs8015283	A	G	0.1253	0.0304	0.0065	2.91e-06	0.0552	0.0378	0.144544	101.348
MDD	Parathyroid hormone	rs843812	A	G	0.4117	0.0248	0.0044	1.74e-08	-0.0214	0.0253	0.398107	149.068
MDD	Parathyroid hormone	rs905111	A	G	0.2866	0.0219	0.0048	5.05e-06	-0.0045	0.0277	0.870964	98.1192
MDD	Parathyroid hormone	rs9074	A	G	0.2597	0.031	0.0049	2.51e-10	-0.0083	0.0282	0.776247	184.899
MDD	Parathyroid hormone	rs908639	T	C	0.1979	-0.0242	0.0054	7.41e-06	0.001	0.0308	0.977237	93.0158
MDD	Parathyroid hormone	rs9307085	T	C	0.9097	0.0384	0.0076	4.36e-07	-0.0988	0.0443	0.025704	121.206
MDD	Parathyroid hormone	rs9364755	A	G	0.7738	-0.0283	0.0051	2.87e-08	-0.031	0.0302	0.301995	140.277
MDD	Parathyroid hormone	rs9529314	A	G	0.2028	-0.0335	0.0053	2.6e-10	0.0388	0.0317	0.218776	181.574
MDD	Parathyroid hormone	rs9538160	A	G	0.3673	-0.0225	0.0045	5.73e-07	-0.0172	0.0262	0.512861	117.722
MDD	Parathyroid hormone	rs9596774	T	C	0.3261	0.0255	0.0046	2.97e-08	-0.0228	0.0263	0.389045	142.995
MDD	Parathyroid hormone	rs9825208	T	G	0.4454	-0.0204	0.0043	2.09e-06	0.0039	0.0251	0.870964	102.861
MDD	Parathyroid hormone	rs9920233	A	C	0.4686	-0.0202	0.0043	2.63e-06	0.0155	0.0248	0.537032	101.668
AD	Serum 25-Hydroxyvitamin D levels	rs10091076	C	T	0.309624	0.0117607	0.002337	4.84e-07	-0.00101	0.002092	0.629266	26.9216
AD	Serum 25-Hydroxyvitamin D levels	rs10437655	A	G	0.385063	0.010917	0.00222519	9.29e-07	0.005505	0.001991	0.00570296	25.6968
AD	Serum 25-Hydroxyvitamin D levels	rs10933431	G	C	0.244487	-0.015437	0.00250901	7.62e-10	-0.00012	0.00236	0.959589	40.0817
AD	Serum 25-Hydroxyvitamin D levels	rs11100203	G	A	0.363921	-0.0103692	0.00225194	4.13e-06	0.001843	0.002037	0.365492	22.6631
AD	Serum 25-Hydroxyvitamin D levels	rs111278892	G	C	0.147136	0.0199116	0.00305025	6.67e-11	-0.001367	0.0027	0.612496	45.3044
AD	Serum 25-Hydroxyvitamin D levels	rs111677930	G	T	0.167801	-0.0143935	0.00312028	3.97e-06	-0.00272	0.002607	0.296816	26.3429
AD	Serum 25-Hydroxyvitamin D levels	rs11218343	C	T	0.0440715	-0.0359264	0.00525509	8.12e-12	-0.003935	0.005104	0.440771	49.5157
AD	Serum 25-Hydroxyvitamin D levels	rs11257238	C	T	0.360964	0.0129434	0.00226135	1.04e-08	0.004572	0.002021	0.0236908	35.1887
AD	Serum 25-Hydroxyvitamin D levels	rs113260531	A	G	0.126086	0.0199858	0.00325141	7.91e-10	-0.000232	0.003001	0.938449	40.0777
AD	Serum 25-Hydroxyvitamin D levels	rs1171812	C	T	0.475192	0.0102227	0.0021751	2.6e-06	-0.000118	0.001952	0.951597	23.7304
AD	Serum 25-Hydroxyvitamin D levels	rs117285649	C	T	0.0356791	0.0278698	0.00581355	1.64e-06	0.003111	0.004526	0.491946	24.3339
AD	Serum 25-Hydroxyvitamin D levels	rs12148472	C	T	0.13283	-0.0143698	0.00318178	6.29e-06	0.008109	0.00289	0.00503501	21.6575
AD	Serum 25-Hydroxyvitamin D levels	rs12590654	A	G	0.33648	-0.0148266	0.0023078	1.32e-10	0.002257	0.002083	0.278353	44.6915
AD	Serum 25-Hydroxyvitamin D levels	rs140416309	C	G	0.02187	0.164644	0.0365491	6.65e-06	-0.005997	0.008277	0.468802	528.597
AD	Serum 25-Hydroxyvitamin D levels	rs141071274	C	G	0.0135818	-0.204096	0.0461849	9.91e-06	0.000384	0.009116	0.966385	508.695
AD	Serum 25-Hydroxyvitamin D levels	rs141872738	G	A	0.0211272	0.0819568	0.0183682	8.12e-06	-0.000296	0.007386	0.967971	126.516
AD	Serum 25-Hydroxyvitamin D levels	rs143465942	A	G	0.00950108	0.0575107	0.0118267	1.16e-06	-0.002492	0.009399	0.790932	28.3424
AD	Serum 25-Hydroxyvitamin D levels	rs16946801	C	T	0.388297	-0.0105828	0.00221262	1.73e-06	0.000386	0.002004	0.847264	24.2223
AD	Serum 25-Hydroxyvitamin D levels	rs17646025	T	C	0.181953	-0.0135944	0.00279574	1.16e-06	-0.00341	0.0025	0.172471	25.0478
AD	Serum 25-Hydroxyvitamin D levels	rs1859788	A	G	0.32433	-0.0183957	0.00231275	1.8e-15	0.005524	0.002082	0.00799098	67.5315
AD	Serum 25-Hydroxyvitamin D levels	rs2018420	C	T	0.3161	-0.0268306	0.00568112	2.33e-06	-0.00187	0.002246	0.405183	141.742
AD	Serum 25-Hydroxyvitamin D levels	rs2081545	A	C	0.382122	-0.01787	0.00222975	1.11e-15	0.003162	0.001973	0.109088	68.6604
AD	Serum 25-Hydroxyvitamin D levels	rs2168589	A	T	0.358531	0.0102353	0.00225637	5.73e-06	0.000964	0.00206	0.639725	21.9385
AD	Serum 25-Hydroxyvitamin D levels	rs2544702	A	C	0.249523	-0.0120006	0.00249733	1.54e-06	-0.000145	0.002289	0.949548	24.5565
AD	Serum 25-Hydroxyvitamin D levels	rs28394864	A	G	0.453265	0.0123015	0.00218049	1.68e-08	-0.000921	0.001955	0.63771	34.1479
AD	Serum 25-Hydroxyvitamin D levels	rs28468656	G	T	0.19729	0.0126685	0.00275014	4.1e-06	-0.002119	0.002494	0.395389	23.1432
AD	Serum 25-Hydroxyvitamin D levels	rs28561385	C	T	0.2644	0.0265383	0.00598962	9.39e-06	-0.002517	0.00225	0.263355	124.753
AD	Serum 25-Hydroxyvitamin D levels	rs28636611	T	G	0.293348	0.0120136	0.00238521	4.74e-07	-0.00277	0.002192	0.2063	27.2423
AD	Serum 25-Hydroxyvitamin D levels	rs335445	G	A	0.073745	0.0183171	0.004132	9.29e-06	-0.000122	0.004594	0.978821	20.8682
AD	Serum 25-Hydroxyvitamin D levels	rs35283920	T	C	0.312997	0.0124306	0.00233643	1.04e-07	0.003765	0.002067	0.0685725	30.2551
AD	Serum 25-Hydroxyvitamin D levels	rs359539	A	G	0.305051	-0.0124227	0.00234307	1.15e-07	0.000271	0.002135	0.898961	29.7901
AD	Serum 25-Hydroxyvitamin D levels	rs375972689	G	T	0.00950108	0.165797	0.0118138	9.62e-45	-0.014921	0.009823	0.128748	235.664
AD	Serum 25-Hydroxyvitamin D levels	rs3859570	C	T	0.416184	0.0263925	0.00535866	8.43e-07	-0.001832	0.002	0.359462	154.154
AD	Serum 25-Hydroxyvitamin D levels	rs4236673	A	G	0.377826	-0.0201614	0.00222872	1.48e-19	2e-05	0.001982	0.991971	87.0192
AD	Serum 25-Hydroxyvitamin D levels	rs4311	T	C	0.478796	-0.0113448	0.00217313	1.78e-07	0.004187	0.001963	0.0329602	29.2458
AD	Serum 25-Hydroxyvitamin D levels	rs442495	C	T	0.354342	-0.0137211	0.00225771	1.22e-09	0.001705	0.002081	0.412534	39.2217
AD	Serum 25-Hydroxyvitamin D levels	rs4433032	G	C	0.059794	-0.0218688	0.00483233	6.02e-06	0.005901	0.004216	0.161587	24.4816
AD	Serum 25-Hydroxyvitamin D levels	rs4575098	A	G	0.228026	0.0164116	0.0025766	1.9e-10	-0.002656	0.0023	0.248088	43.1735
AD	Serum 25-Hydroxyvitamin D levels	rs4663105	C	A	0.411349	0.0310951	0.00222023	1.45e-44	0.001499	0.001987	0.450481	213.275
AD	Serum 25-Hydroxyvitamin D levels	rs4817090	C	T	0.361426	0.0115089	0.00227386	4.16e-07	0.00122	0.00205	0.551785	27.8362
AD	Serum 25-Hydroxyvitamin D levels	rs6014724	G	A	0.0950416	-0.0228943	0.00368812	5.38e-10	-0.002548	0.003445	0.459599	41.0507
AD	Serum 25-Hydroxyvitamin D levels	rs6125601	A	G	0.225962	0.0119702	0.0026058	4.36e-06	-0.001383	0.002332	0.553141	22.8196
AD	Serum 25-Hydroxyvitamin D levels	rs6448453	A	G	0.262473	0.0147046	0.00245087	1.98e-09	-0.000582	0.002185	0.790076	38.1148
AD	Serum 25-Hydroxyvitamin D levels	rs6499775	G	A	0.136049	0.014651	0.00314978	3.3e-06	-0.004229	0.002962	0.153355	22.9735
AD	Serum 25-Hydroxyvitamin D levels	rs6768338	T	A	0.2416	0.0278491	0.00617093	6.39e-06	-0.004484	0.002363	0.0577684	129.427
AD	Serum 25-Hydroxyvitamin D levels	rs679515	T	C	0.171481	0.0254177	0.00286314	6.83e-19	0.002261	0.002536	0.372706	83.5904
AD	Serum 25-Hydroxyvitamin D levels	rs6890748	A	G	0.41623	0.0110901	0.00219583	4.41e-07	-0.000382	0.001969	0.845984	27.2117
AD	Serum 25-Hydroxyvitamin D levels	rs6910948	C	A	0.257222	0.0130542	0.00247864	1.39e-07	0.001705	0.002192	0.436642	29.647
AD	Serum 25-Hydroxyvitamin D levels	rs6931277	T	A	0.156437	-0.0193385	0.0029691	7.35e-11	0.006948	0.002497	0.00541103	44.9396
AD	Serum 25-Hydroxyvitamin D levels	rs7247764	C	T	0.178827	0.0181323	0.00281639	1.21e-10	-2.8e-05	0.002595	0.99135	43.9642
AD	Serum 25-Hydroxyvitamin D levels	rs73942838	G	A	0.133939	-0.0361909	0.00775562	3.07e-06	-0.000633	0.002903	0.827278	138.38
AD	Serum 25-Hydroxyvitamin D levels	rs7427078	T	C	0.3757	0.0532702	0.0110368	1.39e-06	0.004545	0.002053	0.0268578	606.83
AD	Serum 25-Hydroxyvitamin D levels	rs755951	C	A	0.413043	0.0150046	0.0022103	1.13e-11	0.00414	0.001994	0.0378451	49.703
AD	Serum 25-Hydroxyvitamin D levels	rs76953845	G	T	0.0429165	0.0277472	0.00566781	9.8e-07	-0.006394	0.00505	0.205421	28.7957
AD	Serum 25-Hydroxyvitamin D levels	rs7810606	T	C	0.485387	-0.0145187	0.0021826	2.89e-11	-0.001532	0.001955	0.433088	47.9462
AD	Serum 25-Hydroxyvitamin D levels	rs78722519	C	A	0.00970126	0.0494326	0.0110127	7.17e-06	-0.004183	0.009627	0.663959	21.376
AD	Serum 25-Hydroxyvitamin D levels	rs79444105	T	C	0.0214506	0.033854	0.0074762	5.95e-06	0.010618	0.005893	0.0715814	21.9053
AD	Serum 25-Hydroxyvitamin D levels	rs79832570	C	T	0.0921004	0.0184756	0.00396116	3.1e-06	-0.001164	0.003626	0.748221	25.9899
AD	Serum 25-Hydroxyvitamin D levels	rs8003201	A	G	0.123745	0.0153073	0.00328657	3.2e-06	-0.002646	0.003059	0.387185	23.1345
AD	Serum 25-Hydroxyvitamin D levels	rs8004500	A	G	0.414768	0.0238328	0.00536147	8.78e-06	0.004188	0.00202	0.0381681	125.571
AD	Serum 25-Hydroxyvitamin D levels	rs867611	G	A	0.317416	-0.0204289	0.00232383	1.48e-18	0.000986	0.002079	0.635403	82.3455
AD	Serum 25-Hydroxyvitamin D levels	rs9381563	C	T	0.355744	0.0144515	0.00227161	1.99e-10	-0.001811	0.002035	0.373592	43.5862
AD	Serum 25-Hydroxyvitamin D levels	rs9401134	C	G	0.0886049	0.017853	0.00381765	2.92e-06	-0.005566	0.003506	0.112354	23.4367
AD	Serum 25-Hydroxyvitamin D levels	rs951977	G	C	0.0218817	-0.0359574	0.0078829	5.08e-06	-0.008528	0.006391	0.182056	25.1975
AD	Serum 25-Hydroxyvitamin D levels	rs9971438	C	T	0.220265	0.0285585	0.00637387	7.44e-06	-0.001555	0.002356	0.509234	127.576
AD	fibroblast growth factor 23	rs10091076	C	T	0.309624	0.0117607	0.002337	4.84324e-07	-0.0102	0.012	0.3978	26.9216
AD	fibroblast growth factor 23	rs10437655	A	G	0.385063	0.010917	0.00222518	9.29013e-07	0.0116	0.0105	0.269	25.6968
AD	fibroblast growth factor 23	rs10933431	G	C	0.244487	-0.015437	0.00250901	7.62165e-10	-0.0063	0.0144	0.659601	40.0817
AD	fibroblast growth factor 23	rs11100203	G	A	0.363921	-0.0103692	0.00225194	4.13277e-06	-0.0091	0.0116	0.4351	22.6631
AD	fibroblast growth factor 23	rs111278892	G	C	0.147136	0.0199116	0.00305025	6.67175e-11	-0.0142	0.0158	0.3696	45.3044
AD	fibroblast growth factor 23	rs111677930	G	T	0.167801	-0.0143935	0.00312028	3.97141e-06	-0.0232	0.0154	0.1318	26.3429
AD	fibroblast growth factor 23	rs11218343	C	T	0.0440715	-0.0359264	0.00525509	8.11528e-12	-0.044	0.0277	0.1123	49.5157
AD	fibroblast growth factor 23	rs11257238	C	T	0.360964	0.0129434	0.00226135	1.04209e-08	0.0031	0.011	0.780899	35.1887
AD	fibroblast growth factor 23	rs113260531	A	G	0.126086	0.0199858	0.00325141	7.90536e-10	0.0089	0.0156	0.5665	40.0777
AD	fibroblast growth factor 23	rs1171812	C	T	0.475192	0.0102227	0.0021751	2.60333e-06	-0.0073	0.0106	0.4935	23.7305
AD	fibroblast growth factor 23	rs117285649	C	T	0.0356791	0.0278698	0.00581355	1.63538e-06	0.0297	0.0297	0.3182	24.3339
AD	fibroblast growth factor 23	rs12148472	C	T	0.13283	-0.0143698	0.00318178	6.29383e-06	-0.0309	0.0154	0.0454601	21.6575
AD	fibroblast growth factor 23	rs12590654	A	G	0.33648	-0.0148266	0.0023078	1.32257e-10	-0.0076	0.0124	0.5408	44.6915
AD	fibroblast growth factor 23	rs12972156	G	C	0.12935	0.165392	0.00322128	0	0.0077	0.0143	0.5915	2822.33
AD	fibroblast growth factor 23	rs140416309	C	G	0.02187	0.164644	0.0365491	6.646e-06	-0.0041	0.0447	0.9273	528.597
AD	fibroblast growth factor 23	rs141071274	C	G	0.0135818	-0.204096	0.0461849	9.911e-06	0.0773	0.0628	0.2182	508.695
AD	fibroblast growth factor 23	rs141872738	G	A	0.0211272	0.0819568	0.0183682	8.12396e-06	0.0317	0.0329	0.3359	126.516
AD	fibroblast growth factor 23	rs143465942	A	G	0.00950108	0.0575107	0.0118267	1.15736e-06	-0.0147	0.0506	0.771101	28.3424
AD	fibroblast growth factor 23	rs16946801	C	T	0.388297	-0.0105828	0.00221262	1.72755e-06	-0.0182	0.0105	0.0828095	24.2223
AD	fibroblast growth factor 23	rs17646025	T	C	0.181953	-0.0135944	0.00279574	1.15879e-06	-0.0001	0.0127	0.9941	25.0478
AD	fibroblast growth factor 23	rs1859788	A	G	0.32433	-0.0183957	0.00231274	1.80481e-15	0.0097	0.0124	0.4381	67.5315
AD	fibroblast growth factor 23	rs2018420	C	T	0.3161	-0.0268306	0.00568112	2.32667e-06	-0.017	0.0128	0.1857	141.742
AD	fibroblast growth factor 23	rs2081545	A	C	0.382122	-0.01787	0.00222975	1.10699e-15	0.0065	0.0118	0.5831	68.6604
AD	fibroblast growth factor 23	rs2168589	A	T	0.358531	0.0102353	0.00225637	5.72876e-06	0.003	0.0108	0.7822	21.9385
AD	fibroblast growth factor 23	rs2544702	A	C	0.249523	-0.0120006	0.00249733	1.54451e-06	0.0195	0.0122	0.1101	24.5565
AD	fibroblast growth factor 23	rs28394864	A	G	0.453265	0.0123015	0.00218049	1.68452e-08	-0.0054	0.0103	0.6	34.1479
AD	fibroblast growth factor 23	rs28468656	G	T	0.19729	0.0126685	0.00275014	4.0951e-06	0.0221	0.0147	0.1326	23.1432
AD	fibroblast growth factor 23	rs28561385	C	T	0.2644	0.0265383	0.00598962	9.39238e-06	0.009	0.0143	0.5266	124.753
AD	fibroblast growth factor 23	rs28636611	T	G	0.293348	0.0120136	0.00238521	4.73654e-07	-0.0043	0.0116	0.713801	27.2423
AD	fibroblast growth factor 23	rs335445	G	A	0.073745	0.0183171	0.00413199	9.29303e-06	0.0047	0.0242	0.8465	20.8682
AD	fibroblast growth factor 23	rs35283920	T	C	0.312997	0.0124306	0.00233644	1.03578e-07	-0.0036	0.0117	0.7596	30.2551
AD	fibroblast growth factor 23	rs359539	A	G	0.305051	-0.0124227	0.00234307	1.14607e-07	-0.0139	0.0121	0.2502	29.7901
AD	fibroblast growth factor 23	rs375972689	G	T	0.00950108	0.165797	0.0118138	9.62414e-45	-0.0549	0.0622	0.3769	235.664
AD	fibroblast growth factor 23	rs3859570	C	T	0.416184	0.0263925	0.00535866	8.42713e-07	-0.0103	0.0112	0.358	154.154
AD	fibroblast growth factor 23	rs4236673	A	G	0.377826	-0.0201614	0.00222872	1.48012e-19	0.0078	0.0105	0.4575	87.0192
AD	fibroblast growth factor 23	rs4311	T	C	0.478796	-0.0113448	0.00217313	1.78454e-07	0.0163	0.0106	0.1234	29.2458
AD	fibroblast growth factor 23	rs442495	C	T	0.354342	-0.0137211	0.00225772	1.22124e-09	0.014	0.0118	0.2359	39.2217
AD	fibroblast growth factor 23	rs4433032	G	C	0.059794	-0.0218688	0.00483233	6.02468e-06	0.0196	0.0222	0.3773	24.4816
AD	fibroblast growth factor 23	rs4575098	A	G	0.228026	0.0164116	0.00257659	1.8964e-10	0.0193	0.0125	0.1226	43.1735
AD	fibroblast growth factor 23	rs4663105	C	A	0.411349	0.0310951	0.00222023	1.44579e-44	0.0067	0.0116	0.562	213.275
AD	fibroblast growth factor 23	rs4817090	C	T	0.361426	0.0115089	0.00227386	4.16218e-07	0.0069	0.0115	0.5495	27.8362
AD	fibroblast growth factor 23	rs59735493	A	G	0.298476	-0.0129852	0.00235955	3.72816e-08	0.0123	0.0113	0.2759	32.149
AD	fibroblast growth factor 23	rs6014724	G	A	0.0950416	-0.0228943	0.00368812	5.38105e-10	0.0073	0.0208	0.7249	41.0507
AD	fibroblast growth factor 23	rs6125601	A	G	0.225962	0.0119702	0.0026058	4.35515e-06	-0.0069	0.0146	0.639	22.8196
AD	fibroblast growth factor 23	rs6448453	A	G	0.262473	0.0147046	0.00245087	1.97618e-09	-0.007	0.0129	0.589899	38.1148
AD	fibroblast growth factor 23	rs6499775	G	A	0.136049	0.014651	0.00314978	3.29623e-06	-0.0014	0.015	0.9275	22.9735
AD	fibroblast growth factor 23	rs6768338	T	A	0.2416	0.0278491	0.00617093	6.39343e-06	0.022	0.0144	0.1254	129.427
AD	fibroblast growth factor 23	rs679515	T	C	0.171481	0.0254177	0.00286314	6.83416e-19	0.0061	0.0131	0.6428	83.5904
AD	fibroblast growth factor 23	rs6890748	A	G	0.41623	0.0110901	0.00219583	4.40625e-07	0.0008	0.0103	0.939	27.2117
AD	fibroblast growth factor 23	rs6910948	C	A	0.257222	0.0130542	0.00247864	1.3891e-07	-0.0137	0.012	0.253	29.647
AD	fibroblast growth factor 23	rs6931277	T	A	0.156437	-0.0193385	0.0029691	7.3549e-11	0.0296	0.014	0.0340997	44.9396
AD	fibroblast growth factor 23	rs7149638	T	C	0.104373	0.0167527	0.00353327	2.12212e-06	0.0362	0.0168	0.03173	23.8889
AD	fibroblast growth factor 23	rs7247764	C	T	0.178827	0.0181323	0.00281639	1.20955e-10	0.004	0.0136	0.7706	43.9642
AD	fibroblast growth factor 23	rs73942838	G	A	0.133939	-0.0361909	0.00775562	3.06502e-06	-0.013	0.0177	0.4634	138.38
AD	fibroblast growth factor 23	rs7427078	T	C	0.3757	0.0532702	0.0110368	1.389e-06	-0.0049	0.0124	0.6924	606.83
AD	fibroblast growth factor 23	rs755951	C	A	0.413043	0.0150046	0.0022103	1.13313e-11	0.0131	0.0106	0.2147	49.703
AD	fibroblast growth factor 23	rs76953845	G	T	0.0429165	0.0277472	0.00566781	9.80122e-07	0.0008	0.0309	0.9789	28.7957
AD	fibroblast growth factor 23	rs7810606	T	C	0.485387	-0.0145187	0.0021826	2.89124e-11	-0.0154	0.0114	0.1779	47.9462
AD	fibroblast growth factor 23	rs78722519	C	A	0.00970126	0.0494326	0.0110127	7.16632e-06	-0.0107	0.0464	0.8178	21.376
AD	fibroblast growth factor 23	rs79444105	T	C	0.0214506	0.033854	0.0074762	5.94786e-06	-0.0054	0.0361	0.8821	21.9053
AD	fibroblast growth factor 23	rs79832570	C	T	0.0921004	0.0184756	0.00396116	3.09855e-06	-0.0668	0.0235	0.00454999	25.9899
AD	fibroblast growth factor 23	rs8003201	A	G	0.123745	0.0153073	0.00328657	3.20052e-06	0.0208	0.0183	0.2558	23.1345
AD	fibroblast growth factor 23	rs8004500	A	G	0.414768	0.0238328	0.00536147	8.78105e-06	-0.0228	0.011	0.0389296	125.571
AD	fibroblast growth factor 23	rs867611	G	A	0.317416	-0.0204289	0.00232384	1.48189e-18	0.0134	0.0111	0.2246	82.3455
AD	fibroblast growth factor 23	rs9381563	C	T	0.355744	0.0144515	0.00227161	1.99407e-10	-0.001	0.0122	0.937	43.5862
AD	fibroblast growth factor 23	rs9401134	C	G	0.0886049	0.017853	0.00381765	2.9189e-06	0.0024	0.0212	0.9093	23.4367
AD	fibroblast growth factor 23	rs951977	G	C	0.0218817	-0.0359574	0.0078829	5.08044e-06	-0.0328	0.0382	0.3899	25.1975
AD	fibroblast growth factor 23	rs9971438	C	T	0.220265	0.0285585	0.00637387	7.44487e-06	-0.0101	0.0128	0.4272	127.576
AD	Parathyroid hormone	rs10091076	C	T	0.309624	0.0117607	0.002337	4.84324e-07	0.0346	0.0268	0.199526	26.9216
AD	Parathyroid hormone	rs10437655	A	G	0.385063	0.010917	0.00222518	9.29013e-07	-0.0042	0.0253	0.870964	25.6968
AD	Parathyroid hormone	rs10933431	G	C	0.244487	-0.015437	0.00250901	7.62165e-10	-0.0093	0.0299	0.758578	40.0817
AD	Parathyroid hormone	rs11100203	G	A	0.363921	-0.0103692	0.00225194	4.13277e-06	-0.049	0.0259	0.0588844	22.6631
AD	Parathyroid hormone	rs111278892	G	C	0.147136	0.0199116	0.00305025	6.67175e-11	-0.0105	0.0336	0.758578	45.3044
AD	Parathyroid hormone	rs111677930	G	T	0.167801	-0.0143935	0.00312028	3.97141e-06	-0.0142	0.0341	0.676083	26.3429
AD	Parathyroid hormone	rs11218343	C	T	0.0440715	-0.0359264	0.00525509	8.11528e-12	-0.0096	0.067	0.891251	49.5157
AD	Parathyroid hormone	rs11257238	C	T	0.360964	0.0129434	0.00226135	1.04209e-08	0.0304	0.0255	0.234423	35.1887
AD	Parathyroid hormone	rs113260531	A	G	0.126086	0.0199858	0.00325141	7.90536e-10	-0.0078	0.0373	0.831764	40.0777
AD	Parathyroid hormone	rs1171812	C	T	0.475192	0.0102227	0.0021751	2.60333e-06	-0.0045	0.0248	0.851138	23.7305
AD	Parathyroid hormone	rs117285649	C	T	0.0356791	0.0278698	0.00581355	1.63538e-06	0.0309	0.0566	0.588844	24.3339
AD	Parathyroid hormone	rs12148472	C	T	0.13283	-0.0143698	0.00318178	6.29383e-06	-0.0303	0.0372	0.416869	21.6575
AD	Parathyroid hormone	rs12590654	A	G	0.33648	-0.0148266	0.0023078	1.32257e-10	-0.0108	0.027	0.691831	44.6915
AD	Parathyroid hormone	rs12972156	G	C	0.12935	0.165392	0.00322128	0	0.0408	0.0347	0.239883	2822.33
AD	Parathyroid hormone	rs140416309	C	G	0.02187	0.164644	0.0365491	6.646e-06	-0.084	0.0992	0.398107	528.597
AD	Parathyroid hormone	rs141872738	G	A	0.0211272	0.0819568	0.0183682	8.12396e-06	0.0345	0.0879	0.691831	126.516
AD	Parathyroid hormone	rs143465942	A	G	0.00950108	0.0575107	0.0118267	1.15736e-06	0.1336	0.1114	0.229087	28.3424
AD	Parathyroid hormone	rs16946801	C	T	0.388297	-0.0105828	0.00221262	1.72755e-06	0.0281	0.0256	0.269153	24.2223
AD	Parathyroid hormone	rs17646025	T	C	0.181953	-0.0135944	0.00279574	1.15879e-06	0.0022	0.0326	0.954993	25.0478
AD	Parathyroid hormone	rs1859788	A	G	0.32433	-0.0183957	0.00231274	1.80481e-15	-0.0151	0.0297	0.616595	67.5315
AD	Parathyroid hormone	rs2018420	C	T	0.3161	-0.0268306	0.00568112	2.32667e-06	0.028	0.028	0.316228	141.742
AD	Parathyroid hormone	rs2081545	A	C	0.382122	-0.01787	0.00222975	1.10699e-15	-0.0208	0.0256	0.416869	68.6604
AD	Parathyroid hormone	rs2168589	A	T	0.358531	0.0102353	0.00225637	5.72876e-06	-0.0032	0.0262	0.912011	21.9385
AD	Parathyroid hormone	rs2544702	A	C	0.249523	-0.0120006	0.00249733	1.54451e-06	0.0187	0.0299	0.524807	24.5565
AD	Parathyroid hormone	rs28394864	A	G	0.453265	0.0123015	0.00218049	1.68452e-08	-0.0421	0.0249	0.0912011	34.1479
AD	Parathyroid hormone	rs28468656	G	T	0.19729	0.0126685	0.00275014	4.0951e-06	0.0037	0.0329	0.912011	23.1432
AD	Parathyroid hormone	rs28561385	C	T	0.2644	0.0265383	0.00598962	9.39238e-06	0.0035	0.0279	0.891251	124.753
AD	Parathyroid hormone	rs28636611	T	G	0.293348	0.0120136	0.00238521	4.73654e-07	0.0308	0.0278	0.269153	27.2423
AD	Parathyroid hormone	rs335445	G	A	0.073745	0.0183171	0.00413199	9.29303e-06	0.016	0.056	0.776247	20.8682
AD	Parathyroid hormone	rs35283920	T	C	0.312997	0.0124306	0.00233644	1.03578e-07	0.0104	0.0265	0.691831	30.2551
AD	Parathyroid hormone	rs359539	A	G	0.305051	-0.0124227	0.00234307	1.14607e-07	-0.001	0.0276	0.977237	29.7901
AD	Parathyroid hormone	rs375972689	G	T	0.00950108	0.165797	0.0118138	9.62414e-45	-0.01	0.1324	0.933254	235.664
AD	Parathyroid hormone	rs3859570	C	T	0.416184	0.0263925	0.00535866	8.42713e-07	0.0348	0.0252	0.165959	154.154
AD	Parathyroid hormone	rs4236673	A	G	0.377826	-0.0201614	0.00222872	1.48012e-19	-0.0031	0.0253	0.912011	87.0192
AD	Parathyroid hormone	rs4311	T	C	0.478796	-0.0113448	0.00217313	1.78454e-07	-0.0193	0.025	0.436516	29.2458
AD	Parathyroid hormone	rs442495	C	T	0.354342	-0.0137211	0.00225772	1.22124e-09	0.0055	0.0266	0.831764	39.2217
AD	Parathyroid hormone	rs4433032	G	C	0.059794	-0.0218688	0.00483233	6.02468e-06	0.0021	0.054	0.977237	24.4816
AD	Parathyroid hormone	rs4575098	A	G	0.228026	0.0164116	0.00257659	1.8964e-10	-0.0127	0.0289	0.660693	43.1735
AD	Parathyroid hormone	rs4663105	C	A	0.411349	0.0310951	0.00222023	1.44579e-44	0.0317	0.0255	0.213796	213.275
AD	Parathyroid hormone	rs4817090	C	T	0.361426	0.0115089	0.00227386	4.16218e-07	-0.0121	0.0268	0.645654	27.8362
AD	Parathyroid hormone	rs59735493	A	G	0.298476	-0.0129852	0.00235955	3.72816e-08	-0.0553	0.0271	0.0416869	32.149
AD	Parathyroid hormone	rs6014724	G	A	0.0950416	-0.0228943	0.00368812	5.38105e-10	0.047	0.0436	0.281838	41.0507
AD	Parathyroid hormone	rs6125601	A	G	0.225962	0.0119702	0.0026058	4.35515e-06	-0.0183	0.0306	0.549541	22.8196
AD	Parathyroid hormone	rs6448453	A	G	0.262473	0.0147046	0.00245087	1.97618e-09	-0.001	0.0281	0.977237	38.1148
AD	Parathyroid hormone	rs6499775	G	A	0.136049	0.014651	0.00314978	3.29623e-06	-0.0309	0.0362	0.398107	22.9735
AD	Parathyroid hormone	rs6768338	T	A	0.2416	0.0278491	0.00617093	6.39343e-06	-0.0042	0.0294	0.891251	129.427
AD	Parathyroid hormone	rs679515	T	C	0.171481	0.0254177	0.00286314	6.83416e-19	0.0026	0.0329	0.933254	83.5904
AD	Parathyroid hormone	rs6890748	A	G	0.41623	0.0110901	0.00219583	4.40625e-07	0.014	0.0254	0.588844	27.2117
AD	Parathyroid hormone	rs6910948	C	A	0.257222	0.0130542	0.00247864	1.3891e-07	-0.0341	0.028	0.223872	29.647
AD	Parathyroid hormone	rs6931277	T	A	0.156437	-0.0193385	0.0029691	7.3549e-11	0.0525	0.0308	0.0891251	44.9396
AD	Parathyroid hormone	rs7149638	T	C	0.104373	0.0167527	0.00353327	2.12212e-06	0.0199	0.0424	0.645654	23.8889
AD	Parathyroid hormone	rs7247764	C	T	0.178827	0.0181323	0.00281639	1.20955e-10	0.0206	0.0334	0.537032	43.9642
AD	Parathyroid hormone	rs73942838	G	A	0.133939	-0.0361909	0.00775562	3.06502e-06	-0.0622	0.0371	0.0933254	138.38
AD	Parathyroid hormone	rs7427078	T	C	0.3757	0.0532702	0.0110368	1.389e-06	0.0063	0.0257	0.812831	606.83
AD	Parathyroid hormone	rs755951	C	A	0.413043	0.0150046	0.0022103	1.13313e-11	0.0094	0.0256	0.707946	49.703
AD	Parathyroid hormone	rs76953845	G	T	0.0429165	0.0277472	0.00566781	9.80122e-07	0.0048	0.0613	0.933254	28.7957
AD	Parathyroid hormone	rs7810606	T	C	0.485387	-0.0145187	0.0021826	2.89124e-11	-0.0197	0.0246	0.426581	47.9462
AD	Parathyroid hormone	rs78722519	C	A	0.00970126	0.0494326	0.0110127	7.16632e-06	0.1406	0.117	0.229087	21.376
AD	Parathyroid hormone	rs79444105	T	C	0.0214506	0.033854	0.0074762	5.94786e-06	0.12	0.0767	0.11749	21.9053
AD	Parathyroid hormone	rs79832570	C	T	0.0921004	0.0184756	0.00396116	3.09855e-06	0.028	0.0447	0.524807	25.9899
AD	Parathyroid hormone	rs8003201	A	G	0.123745	0.0153073	0.00328657	3.20052e-06	-0.0059	0.039	0.870964	23.1345
AD	Parathyroid hormone	rs8004500	A	G	0.414768	0.0238328	0.00536147	8.78105e-06	0.0241	0.0257	0.346737	125.571
AD	Parathyroid hormone	rs867611	G	A	0.317416	-0.0204289	0.00232384	1.48189e-18	0.049	0.0262	0.0616595	82.3455
AD	Parathyroid hormone	rs9381563	C	T	0.355744	0.0144515	0.00227161	1.99407e-10	0.0029	0.0255	0.912011	43.5862
AD	Parathyroid hormone	rs9401134	C	G	0.0886049	0.017853	0.00381765	2.9189e-06	-0.0216	0.0459	0.630957	23.4367
AD	Parathyroid hormone	rs951977	G	C	0.0218817	-0.0359574	0.0078829	5.08044e-06	0.0153	0.0883	0.870964	25.1975
AD	Parathyroid hormone	rs9971438	C	T	0.220265	0.0285585	0.00637387	7.44487e-06	0.0094	0.0301	0.758578	127.576
BD	Serum 25-Hydroxyvitamin D levels	rs10035291	T	C	0.6799	0.0778958	0.0147	1.16e-07	-0.004037	0.002058	0.0497852	136.929
BD	Serum 25-Hydroxyvitamin D levels	rs10075788	A	G	0.6282	-0.0711953	0.0143	6.4e-07	0.000723	0.002024	0.721021	122.723
BD	Serum 25-Hydroxyvitamin D levels	rs1007893	T	C	0.4771	-0.0620031	0.0134	3.71e-06	0.006514	0.001987	0.00104701	99.3747
BD	Serum 25-Hydroxyvitamin D levels	rs10092482	T	C	0.2018	0.0837987	0.0172	1.1e-06	-8.8e-05	0.002525	0.972112	117.241
BD	Serum 25-Hydroxyvitamin D levels	rs10106152	T	C	0.2972	-0.0900013	0.0186	1.31e-06	0.002392	0.002334	0.305428	175.565
BD	Serum 25-Hydroxyvitamin D levels	rs10120508	A	G	0.7157	-0.0726997	0.0148	9.01e-07	0.001638	0.00217	0.450439	111.454
BD	Serum 25-Hydroxyvitamin D levels	rs10136228	A	G	0.5388	-0.060196	0.0134	7.05e-06	0.003294	0.001954	0.0919009	93.2872
BD	Serum 25-Hydroxyvitamin D levels	rs10147900	T	C	0.1779	0.1308	0.0255	2.91e-07	-0.003332	0.002706	0.21821	260.066
BD	Serum 25-Hydroxyvitamin D levels	rs10410775	T	C	0.3936	-0.0641972	0.0144	8.27e-06	0.002144	0.002059	0.297755	101.927
BD	Serum 25-Hydroxyvitamin D levels	rs10492859	A	G	0.7903	0.0732969	0.016	4.63e-06	-0.001418	0.00232	0.540939	92.2409
BD	Serum 25-Hydroxyvitamin D levels	rs10744560	T	C	0.325	0.0832008	0.014	2.8e-09	0.000159	0.002051	0.938209	157.525
BD	Serum 25-Hydroxyvitamin D levels	rs10745843	A	G	0.5845	0.0701975	0.0138	3.64e-07	0.001612	0.002017	0.424222	124.059
BD	Serum 25-Hydroxyvitamin D levels	rs10873527	T	C	0.6451	0.0660967	0.0148	7.97e-06	0.000418	0.002047	0.838116	103.645
BD	Serum 25-Hydroxyvitamin D levels	rs10878840	A	G	0.6123	-0.0636962	0.0138	3.92e-06	0.001348	0.001998	0.499688	99.7958
BD	Serum 25-Hydroxyvitamin D levels	rs10896095	A	G	0.8062	0.087901	0.0172	3.21e-07	0.00509	0.002486	0.0406237	125.147
BD	Serum 25-Hydroxyvitamin D levels	rs10950456	A	G	0.5656	0.065104	0.0138	2.39e-06	-0.002602	0.001963	0.185023	107.921
BD	Serum 25-Hydroxyvitamin D levels	rs11097326	A	G	0.2903	0.0713993	0.0149	1.65e-06	0.000556	0.002114	0.792684	108.846
BD	Serum 25-Hydroxyvitamin D levels	rs111444407	T	C	0.161	0.1166	0.0184	2.34e-10	-0.00374	0.002706	0.166896	190.621
BD	Serum 25-Hydroxyvitamin D levels	rs11191356	A	G	0.9056	0.106097	0.0235	6.34e-06	0.001766	0.003585	0.622373	99.7105
BD	Serum 25-Hydroxyvitamin D levels	rs113583672	A	G	0.9314	-0.123604	0.0249	6.91e-07	0.004713	0.003574	0.187206	101.149
BD	Serum 25-Hydroxyvitamin D levels	rs113779084	A	G	0.2883	0.0656005	0.0146	7.02e-06	0.000946	0.002143	0.658823	91.4767
BD	Serum 25-Hydroxyvitamin D levels	rs11557713	A	G	0.2634	0.0717996	0.0148	1.23e-06	-0.000323	0.002163	0.881371	103.645
BD	Serum 25-Hydroxyvitamin D levels	rs11624408	A	G	0.5477	0.0638007	0.0138	3.78e-06	-0.00092	0.001972	0.640764	104.493
BD	Serum 25-Hydroxyvitamin D levels	rs11647445	T	G	0.6272	-0.074896	0.0142	1.33e-07	0.003501	0.002029	0.0844617	135.996
BD	Serum 25-Hydroxyvitamin D levels	rs11724116	T	C	0.1491	-0.104095	0.0188	3.08e-08	0.000549	0.00273	0.840691	142.56
BD	Serum 25-Hydroxyvitamin D levels	rs1180221	T	C	0.4145	0.0934995	0.0205	5.09e-06	0.001138	0.002052	0.579262	220.345
BD	Serum 25-Hydroxyvitamin D levels	rs12063329	T	C	0.831	0.0911013	0.0181	4.82e-07	-0.000964	0.002608	0.711798	120.82
BD	Serum 25-Hydroxyvitamin D levels	rs12135727	T	C	0.2028	-0.0761038	0.0165	3.98e-06	0.001499	0.00238	0.528808	97.0174
BD	Serum 25-Hydroxyvitamin D levels	rs12153740	T	C	0.1869	-0.0801044	0.0163	8.91e-07	0.002773	0.002697	0.303752	101.042
BD	Serum 25-Hydroxyvitamin D levels	rs12287648	A	G	0.173	-0.089695	0.0182	8.3e-07	-0.001242	0.002452	0.612407	119.31
BD	Serum 25-Hydroxyvitamin D levels	rs12474837	A	C	0.9235	-0.138802	0.0287	1.32e-06	-0.001609	0.004048	0.690916	141.144
BD	Serum 25-Hydroxyvitamin D levels	rs12538191	A	G	0.2316	-0.0957953	0.0182	1.41e-07	-0.002875	0.002265	0.204214	169.443
BD	Serum 25-Hydroxyvitamin D levels	rs12563424	T	C	0.6421	-0.0697038	0.0139	5.31e-07	-0.000845	0.002038	0.678494	115.727
BD	Serum 25-Hydroxyvitamin D levels	rs12621381	A	C	0.5746	-0.0677972	0.0139	1.07e-06	-0.000902	0.001975	0.647863	116.453
BD	Serum 25-Hydroxyvitamin D levels	rs12672003	A	G	0.8917	-0.116197	0.0209	2.7e-08	0.009463	0.003046	0.00189898	135.194
BD	Serum 25-Hydroxyvitamin D levels	rs12677998	A	G	0.1292	-0.120102	0.0247	1.16e-06	0.006406	0.002909	0.0276509	168.376
BD	Serum 25-Hydroxyvitamin D levels	rs12751064	T	C	0.2674	-0.0736035	0.0149	7.82e-07	-0.002233	0.002078	0.282517	109.986
BD	Serum 25-Hydroxyvitamin D levels	rs12898460	T	C	0.2634	-0.0789999	0.0146	6.27e-08	0.00441	0.002101	0.0358204	125.528
BD	Serum 25-Hydroxyvitamin D levels	rs13011184	A	G	0.9841	-0.247103	0.0557	9.15e-06	0.001914	0.008476	0.821376	98.9947
BD	Serum 25-Hydroxyvitamin D levels	rs145120286	A	G	0.0706	-0.129596	0.0289	7.32e-06	-0.001292	0.004002	0.746741	114.219
BD	Serum 25-Hydroxyvitamin D levels	rs147538909	T	C	0.0527	0.310502	0.0623	6.23e-07	-0.003404	0.007294	0.640721	502.593
BD	Serum 25-Hydroxyvitamin D levels	rs148624439	T	C	0.1819	-0.0822952	0.0181	5.45e-06	-0.002143	0.002592	0.408318	104.437
BD	Serum 25-Hydroxyvitamin D levels	rs17183814	A	G	0.0567	-0.140896	0.0268	1.46e-07	-0.002513	0.003662	0.492531	110.037
BD	Serum 25-Hydroxyvitamin D levels	rs174592	A	G	0.6133	-0.0773995	0.0141	4.03e-08	0.000344	0.002002	0.86344	147.349
BD	Serum 25-Hydroxyvitamin D levels	rs1819204	A	G	0.7644	0.080704	0.0162	6.3e-07	-0.0022	0.002334	0.345781	121.589
BD	Serum 25-Hydroxyvitamin D levels	rs1850	T	C	0.6292	-0.0752948	0.0143	1.4e-07	0.000623	0.002041	0.760302	137.15
BD	Serum 25-Hydroxyvitamin D levels	rs189574365	A	C	0.0219	0.206803	0.0435	1.99e-06	-0.001304	0.006382	0.838072	94.9127
BD	Serum 25-Hydroxyvitamin D levels	rs2388334	A	G	0.4911	-0.0713027	0.0133	8.27e-08	-0.002408	0.001949	0.216676	131.737
BD	Serum 25-Hydroxyvitamin D levels	rs2719169	A	G	0.4095	-0.0739049	0.0138	8.54e-08	0.001898	0.001994	0.341028	136.948
BD	Serum 25-Hydroxyvitamin D levels	rs28565152	A	G	0.2187	0.0802981	0.0158	3.73e-07	-0.000765	0.002261	0.735184	114.189
BD	Serum 25-Hydroxyvitamin D levels	rs28627084	T	C	0.1173	-0.0979988	0.0217	6.3e-06	-0.000572	0.003048	0.851175	103.04
BD	Serum 25-Hydroxyvitamin D levels	rs3110496	A	G	0.336	-0.0649973	0.0144	6.37e-06	-0.001103	0.002102	0.600025	97.6574
BD	Serum 25-Hydroxyvitamin D levels	rs325380	A	C	0.4473	-0.0648052	0.0137	2.24e-06	-0.005991	0.001978	0.00246297	107.597
BD	Serum 25-Hydroxyvitamin D levels	rs329319	A	G	0.4254	0.0788019	0.0139	1.43e-08	-0.002958	0.002041	0.147372	157.451
BD	Serum 25-Hydroxyvitamin D levels	rs34520165	T	C	0.4433	0.0743001	0.0156	1.91e-06	0.002699	0.001986	0.174126	141.277
BD	Serum 25-Hydroxyvitamin D levels	rs34568676	A	G	0.2247	0.0744022	0.0159	2.88e-06	-0.001456	0.002238	0.515296	99.9242
BD	Serum 25-Hydroxyvitamin D levels	rs35955717	T	C	0.8718	0.0945008	0.0198	1.82e-06	0.00471	0.002747	0.0863973	103.426
BD	Serum 25-Hydroxyvitamin D levels	rs36034627	T	G	0.173	-0.0786969	0.0171	4.18e-06	-0.001979	0.002393	0.408097	91.7964
BD	Serum 25-Hydroxyvitamin D levels	rs3804640	A	G	0.5477	0.071902	0.0135	1e-07	0.0011	0.001965	0.575869	132.786
BD	Serum 25-Hydroxyvitamin D levels	rs4595478	T	C	0.1889	0.0927979	0.0178	1.85e-07	-0.001249	0.002632	0.635174	136.81
BD	Serum 25-Hydroxyvitamin D levels	rs4652746	A	G	0.1302	0.0919044	0.0191	1.5e-06	-0.001594	0.002707	0.556083	99.1111
BD	Serum 25-Hydroxyvitamin D levels	rs55648125	A	G	0.9016	-0.117096	0.0215	5.14e-08	0.007543	0.003127	0.0158858	126.106
BD	Serum 25-Hydroxyvitamin D levels	rs56046724	T	C	0.0109	0.4767	0.1048	5.4e-06	-0.006447	0.016909	0.703019	254.611
BD	Serum 25-Hydroxyvitamin D levels	rs56351137	T	C	0.0557	0.139397	0.0312	7.9e-06	-0.000345	0.003914	0.929838	105.912
BD	Serum 25-Hydroxyvitamin D levels	rs56412041	A	C	0.339	0.0691995	0.0147	2.51e-06	0.001443	0.00214	0.500316	111.206
BD	Serum 25-Hydroxyvitamin D levels	rs57681866	A	G	0.0596	-0.161402	0.0296	4.96e-08	0.000983	0.003852	0.798566	151.438
BD	Serum 25-Hydroxyvitamin D levels	rs57957974	A	C	0.3698	0.0729995	0.0145	4.79e-07	0.000683	0.002024	0.735787	128.752
BD	Serum 25-Hydroxyvitamin D levels	rs6051659	A	G	0.827	-0.0837947	0.0183	4.67e-06	0.001868	0.002522	0.45904	104.099
BD	Serum 25-Hydroxyvitamin D levels	rs6060023	T	C	0.1233	-0.0887984	0.0181	9.3e-07	0.003101	0.002526	0.219613	88.2985
BD	Serum 25-Hydroxyvitamin D levels	rs6090435	A	G	0.497	-0.0754997	0.015	4.82e-07	-0.003811	0.001971	0.0532464	147.789
BD	Serum 25-Hydroxyvitamin D levels	rs60960031	A	G	0.4076	-0.0608015	0.0137	9.08e-06	0.005406	0.001982	0.00640605	92.4787
BD	Serum 25-Hydroxyvitamin D levels	rs6102677	T	C	0.6869	-0.0679042	0.0148	4.47e-06	-0.000737	0.002137	0.730205	102.759
BD	Serum 25-Hydroxyvitamin D levels	rs6130775	T	C	0.4821	0.0650009	0.0137	2.09e-06	0.002017	0.001966	0.304989	109.327
BD	Serum 25-Hydroxyvitamin D levels	rs62433108	T	G	0.7167	-0.0683003	0.0148	3.93e-06	0.004378	0.002155	0.0422182	98.1386
BD	Serum 25-Hydroxyvitamin D levels	rs62535709	T	C	0.0507	0.129404	0.0284	5.2e-06	-0.006481	0.004197	0.122526	83.4826
BD	Serum 25-Hydroxyvitamin D levels	rs6675366	T	C	0.9563	-0.164898	0.0333	7.35e-07	0.004327	0.005143	0.400219	117.783
BD	Serum 25-Hydroxyvitamin D levels	rs6767302	A	G	0.5527	0.0703	0.0135	1.91e-07	-0.000575	0.001942	0.767187	126.663
BD	Serum 25-Hydroxyvitamin D levels	rs6782248	A	G	0.835	0.0904986	0.0195	3.47e-06	-0.004366	0.002838	0.124025	116.956
BD	Serum 25-Hydroxyvitamin D levels	rs6788153	T	C	0.9195	0.115799	0.0257	6.61e-06	0.003398	0.003746	0.364263	102.851
BD	Serum 25-Hydroxyvitamin D levels	rs6829845	A	G	0.3459	0.0728972	0.0142	2.84e-07	-0.002327	0.002079	0.26288	124.638
BD	Serum 25-Hydroxyvitamin D levels	rs71395455	A	G	0.7117	0.082096	0.0146	1.88e-08	0.004136	0.002144	0.0537675	143.409
BD	Serum 25-Hydroxyvitamin D levels	rs72673100	A	C	0.4473	-0.0713027	0.0149	1.71e-06	0.000633	0.002014	0.753317	130.311
BD	Serum 25-Hydroxyvitamin D levels	rs735931	A	G	0.505	0.0669014	0.0138	1.25e-06	0.000307	0.001945	0.874686	115.965
BD	Serum 25-Hydroxyvitamin D levels	rs7406066	A	G	0.5308	-0.0613968	0.0136	6.35e-06	-0.000323	0.001972	0.869854	97.2712
BD	Serum 25-Hydroxyvitamin D levels	rs7613933	A	G	0.4742	-0.0665993	0.0137	1.17e-06	-0.001449	0.001965	0.460685	114.623
BD	Serum 25-Hydroxyvitamin D levels	rs7708829	A	G	0.5567	0.064701	0.0135	1.65e-06	-8.7e-05	0.001947	0.964523	107.06
BD	Serum 25-Hydroxyvitamin D levels	rs77516904	A	G	0.9652	-0.170006	0.0355	1.68e-06	-1.2e-05	0.005093	0.998047	100.59
BD	Serum 25-Hydroxyvitamin D levels	rs7915021	T	C	0.1173	-0.0992017	0.02	7.05e-07	0.003299	0.002831	0.243808	105.59
BD	Serum 25-Hydroxyvitamin D levels	rs7916271	T	C	0.5249	-0.070401	0.0141	5.95e-07	-0.002044	0.001966	0.298367	128.139
BD	Serum 25-Hydroxyvitamin D levels	rs7969091	A	G	0.5825	-0.0692	0.0135	2.96e-07	0.002789	0.001959	0.154493	120.716
BD	Serum 25-Hydroxyvitamin D levels	rs80148877	T	C	0.9085	-0.150497	0.0309	1.11e-06	-0.00074	0.003716	0.842058	195.447
BD	Serum 25-Hydroxyvitamin D levels	rs8067817	T	C	0.5427	0.0683967	0.0136	4.93e-07	0.002139	0.001955	0.273993	120.345
BD	Serum 25-Hydroxyvitamin D levels	rs814197	T	G	0.5726	-0.0704976	0.0134	1.43e-07	0.001874	0.001951	0.336607	126.09
BD	Serum 25-Hydroxyvitamin D levels	rs884301	T	C	0.3728	0.0802981	0.0138	5.93e-09	0.000245	0.002029	0.903866	156.384
BD	Serum 25-Hydroxyvitamin D levels	rs9360500	A	C	0.4394	0.0608975	0.0135	6.45e-06	0.001878	0.001949	0.335274	94.6443
BD	Serum 25-Hydroxyvitamin D levels	rs9371601	T	G	0.3708	0.0664991	0.0139	1.72e-06	-0.000586	0.002043	0.774168	106.917
BD	Serum 25-Hydroxyvitamin D levels	rs9372316	A	G	0.7535	-0.0686001	0.0155	9.61e-06	0.000677	0.002281	0.766599	90.5518
BD	Serum 25-Hydroxyvitamin D levels	rs9834970	T	C	0.4891	-0.101003	0.0134	4.79e-14	0.004924	0.001937	0.0110329	264.98
BD	fibroblast growth factor 23	rs10035291	T	C	0.6799	0.0778958	0.0147	1.16417e-07	-0.0124	0.0122	0.3104	136.929
BD	fibroblast growth factor 23	rs10075788	A	G	0.6282	-0.0711953	0.0143	6.40154e-07	-0.015	0.0124	0.2271	122.723
BD	fibroblast growth factor 23	rs1007893	T	C	0.4771	-0.0620031	0.0134	3.70831e-06	-0.0013	0.0106	0.906	99.3747
BD	fibroblast growth factor 23	rs10092482	T	C	0.2018	0.0837987	0.0172	1.10464e-06	-0.0138	0.0137	0.316	117.241
BD	fibroblast growth factor 23	rs10106152	T	C	0.2972	-0.0900013	0.0186	1.30639e-06	-0.0134	0.0145	0.3533	175.565
BD	fibroblast growth factor 23	rs10120508	A	G	0.7157	-0.0726997	0.0148	9.00858e-07	-0.0088	0.0121	0.464	111.454
BD	fibroblast growth factor 23	rs10136228	A	G	0.5388	-0.060196	0.0134	7.04792e-06	0.0037	0.0104	0.723401	93.2872
BD	fibroblast growth factor 23	rs10147900	T	C	0.1779	0.1308	0.0255	2.90639e-07	-0.0025	0.0174	0.8858	260.066
BD	fibroblast growth factor 23	rs10410775	T	C	0.3936	-0.0641972	0.0144	8.26731e-06	-0.0032	0.011	0.7669	101.927
BD	fibroblast growth factor 23	rs10492859	A	G	0.7903	0.0732969	0.016	4.62629e-06	0.0021	0.0127	0.8683	92.2409
BD	fibroblast growth factor 23	rs10744560	T	C	0.325	0.0832008	0.014	2.8e-09	0.0168	0.0109	0.1228	157.525
BD	fibroblast growth factor 23	rs10745843	A	G	0.5845	0.0701975	0.0138	3.64206e-07	0.0134	0.0111	0.23	124.059
BD	fibroblast growth factor 23	rs10873527	T	C	0.6451	0.0660967	0.0148	7.96986e-06	-0.0068	0.0119	0.5657	103.645
BD	fibroblast growth factor 23	rs10878840	A	G	0.6123	-0.0636962	0.0138	3.91834e-06	-0.0155	0.0119	0.1926	99.7958
BD	fibroblast growth factor 23	rs10896095	A	G	0.8062	0.087901	0.0172	3.2127e-07	-0.0085	0.013	0.5113	125.147
BD	fibroblast growth factor 23	rs10950456	A	G	0.5656	0.065104	0.0138	2.38549e-06	0.0022	0.0105	0.8306	107.921
BD	fibroblast growth factor 23	rs11097326	A	G	0.2903	0.0713993	0.0149	1.65209e-06	-0.0047	0.0126	0.7118	108.846
BD	fibroblast growth factor 23	rs111444407	T	C	0.161	0.1166	0.0184	2.34339e-10	0.0208	0.0146	0.1559	190.621
BD	fibroblast growth factor 23	rs11191356	A	G	0.9056	0.106097	0.0235	6.33836e-06	-0.0221	0.0172	0.1992	99.7105
BD	fibroblast growth factor 23	rs113583672	A	G	0.9314	-0.123604	0.0249	6.90546e-07	-0.0015	0.0193	0.938	101.149
BD	fibroblast growth factor 23	rs113779084	A	G	0.2883	0.0656005	0.0146	7.01668e-06	0.0031	0.0119	0.792301	91.4767
BD	fibroblast growth factor 23	rs11557713	A	G	0.2634	0.0717996	0.0148	1.2264e-06	0.0037	0.0117	0.751799	103.645
BD	fibroblast growth factor 23	rs11624408	A	G	0.5477	0.0638007	0.0138	3.77787e-06	-0.0103	0.0109	0.3447	104.493
BD	fibroblast growth factor 23	rs11647445	T	G	0.6272	-0.074896	0.0142	1.33217e-07	0.0081	0.0121	0.5031	135.996
BD	fibroblast growth factor 23	rs11724116	T	C	0.1491	-0.104095	0.0188	3.07785e-08	-0.0022	0.0157	0.8872	142.56
BD	fibroblast growth factor 23	rs1180221	T	C	0.4145	0.0934995	0.0205	5.0923e-06	0.0109	0.0142	0.4441	220.345
BD	fibroblast growth factor 23	rs12063329	T	C	0.831	0.0911013	0.0181	4.82302e-07	-0.0176	0.0155	0.2549	120.82
BD	fibroblast growth factor 23	rs12135727	T	C	0.2028	-0.0761038	0.0165	3.98138e-06	-0.0034	0.0126	0.7897	97.0174
BD	fibroblast growth factor 23	rs12153740	T	C	0.1869	-0.0801044	0.0163	8.90644e-07	0.0095	0.0173	0.5815	101.042
BD	fibroblast growth factor 23	rs12287648	A	G	0.173	-0.089695	0.0182	8.29502e-07	0.0098	0.0146	0.5046	119.31
BD	fibroblast growth factor 23	rs12474837	A	C	0.9235	-0.138802	0.0287	1.32264e-06	0.0424	0.0235	0.0709496	141.144
BD	fibroblast growth factor 23	rs12538191	A	G	0.2316	-0.0957953	0.0182	1.41356e-07	-0.0113	0.0139	0.4156	169.443
BD	fibroblast growth factor 23	rs12563424	T	C	0.6421	-0.0697038	0.0139	5.3126e-07	0.0081	0.0111	0.4614	115.727
BD	fibroblast growth factor 23	rs12621381	A	C	0.5746	-0.0677972	0.0139	1.07442e-06	-0.0012	0.0114	0.9178	116.453
BD	fibroblast growth factor 23	rs12672003	A	G	0.8917	-0.116197	0.0209	2.70308e-08	-0.0136	0.0167	0.4175	135.194
BD	fibroblast growth factor 23	rs12677998	A	G	0.1292	-0.120102	0.0247	1.15955e-06	-0.009	0.019	0.6373	168.376
BD	fibroblast growth factor 23	rs12751064	T	C	0.2674	-0.0736035	0.0149	7.81903e-07	0.0048	0.0116	0.6799	109.986
BD	fibroblast growth factor 23	rs1278516	A	G	0.1014	-0.113001	0.0226	5.73206e-07	-0.005	0.0177	0.776699	120.605
BD	fibroblast growth factor 23	rs12898460	T	C	0.2634	-0.0789999	0.0146	6.26901e-08	0.0027	0.0112	0.8113	125.528
BD	fibroblast growth factor 23	rs13011184	A	G	0.9841	-0.247103	0.0557	9.15076e-06	-0.0272	0.057	0.633	98.9947
BD	fibroblast growth factor 23	rs138321	A	G	0.5149	0.0793009	0.0135	4.25043e-09	-0.0104	0.0109	0.3378	162.954
BD	fibroblast growth factor 23	rs145120286	A	G	0.0706	-0.129596	0.0289	7.31535e-06	-0.0386	0.0248	0.1192	114.219
BD	fibroblast growth factor 23	rs147538909	T	C	0.0527	0.310502	0.0623	6.22882e-07	-0.0108	0.0512	0.8336	502.593
BD	fibroblast growth factor 23	rs148624439	T	C	0.1819	-0.0822952	0.0181	5.4494e-06	0.0173	0.0165	0.2966	104.437
BD	fibroblast growth factor 23	rs16842765	A	G	0.2932	-0.0665993	0.0145	4.36802e-06	0.0106	0.0116	0.3597	95.2329
BD	fibroblast growth factor 23	rs17183814	A	G	0.0567	-0.140896	0.0268	1.46187e-07	0.0312	0.0225	0.1649	110.037
BD	fibroblast growth factor 23	rs174592	A	G	0.6133	-0.0773995	0.0141	4.03464e-08	-0.0026	0.0106	0.8079	147.349
BD	fibroblast growth factor 23	rs1819204	A	G	0.7644	0.080704	0.0162	6.30183e-07	0.0023	0.012	0.8479	121.589
BD	fibroblast growth factor 23	rs1850	T	C	0.6292	-0.0752948	0.0143	1.39905e-07	-0.0118	0.0117	0.3104	137.15
BD	fibroblast growth factor 23	rs189574365	A	C	0.0219	0.206803	0.0435	1.99346e-06	0.0278	0.0382	0.4664	94.9127
BD	fibroblast growth factor 23	rs2305929	A	G	0.8002	-0.0953992	0.0176	5.94631e-08	0.0124	0.0135	0.3587	150.917
BD	fibroblast growth factor 23	rs2388334	A	G	0.4911	-0.0713027	0.0133	8.2715e-08	0.0042	0.0104	0.6853	131.737
BD	fibroblast growth factor 23	rs2719169	A	G	0.4095	-0.0739049	0.0138	8.53538e-08	-0.0126	0.0118	0.2842	136.948
BD	fibroblast growth factor 23	rs28565152	A	G	0.2187	0.0802981	0.0158	3.73175e-07	-0.0069	0.0131	0.600701	114.189
BD	fibroblast growth factor 23	rs28627084	T	C	0.1173	-0.0979988	0.0217	6.29969e-06	-0.0008	0.016	0.9625	103.04
BD	fibroblast growth factor 23	rs3110496	A	G	0.336	-0.0649973	0.0144	6.3706e-06	0.0054	0.0109	0.6181	97.6574
BD	fibroblast growth factor 23	rs325380	A	C	0.4473	-0.0648052	0.0137	2.24179e-06	0.0104	0.0117	0.3741	107.597
BD	fibroblast growth factor 23	rs329319	A	G	0.4254	0.0788019	0.0139	1.43462e-08	0.0035	0.0111	0.7561	157.451
BD	fibroblast growth factor 23	rs34520165	T	C	0.4433	0.0743001	0.0156	1.909e-06	0.021	0.0125	0.0921701	141.277
BD	fibroblast growth factor 23	rs34568676	A	G	0.2247	0.0744022	0.0159	2.87737e-06	0.0003	0.0135	0.9842	99.9242
BD	fibroblast growth factor 23	rs35955717	T	C	0.8718	0.0945008	0.0198	1.81713e-06	-0.0092	0.0156	0.5531	103.426
BD	fibroblast growth factor 23	rs36034627	T	G	0.173	-0.0786969	0.0171	4.18131e-06	0.009	0.0131	0.4948	91.7964
BD	fibroblast growth factor 23	rs3804640	A	G	0.5477	0.071902	0.0135	1.00359e-07	0.0102	0.0107	0.341	132.786
BD	fibroblast growth factor 23	rs4301023	T	C	0.4682	0.0603987	0.0134	6.56371e-06	0.0308	0.0105	0.00347	94.105
BD	fibroblast growth factor 23	rs4595478	T	C	0.1889	0.0927979	0.0178	1.85443e-07	-0.0119	0.0141	0.3988	136.81
BD	fibroblast growth factor 23	rs4652746	A	G	0.1302	0.0919044	0.0191	1.49616e-06	-0.0297	0.016	0.0629303	99.1111
BD	fibroblast growth factor 23	rs4869118	T	C	0.5427	-0.0601004	0.0135	8.51216e-06	0.0101	0.0108	0.3529	92.8715
BD	fibroblast growth factor 23	rs55648125	A	G	0.9016	-0.117096	0.0215	5.1424e-08	-0.0135	0.0187	0.471	126.106
BD	fibroblast growth factor 23	rs56046724	T	C	0.0109	0.4767	0.1048	5.39878e-06	-0.1082	0.0801	0.1765	254.611
BD	fibroblast growth factor 23	rs56351137	T	C	0.0557	0.139397	0.0312	7.90128e-06	0.0116	0.0253	0.6451	105.912
BD	fibroblast growth factor 23	rs56412041	A	C	0.339	0.0691995	0.0147	2.50835e-06	0.0122	0.0116	0.2903	111.206
BD	fibroblast growth factor 23	rs570098	T	G	0.5	-0.0652961	0.0138	2.22752e-06	0.0093	0.0108	0.3931	110.466
BD	fibroblast growth factor 23	rs57681866	A	G	0.0596	-0.161402	0.0296	4.9592e-08	-0.0003	0.0215	0.99	151.438
BD	fibroblast growth factor 23	rs57957974	A	C	0.3698	0.0729995	0.0145	4.79227e-07	0.0133	0.0108	0.2181	128.752
BD	fibroblast growth factor 23	rs6051659	A	G	0.827	-0.0837947	0.0183	4.67322e-06	-0.0185	0.0144	0.2008	104.099
BD	fibroblast growth factor 23	rs6060023	T	C	0.1233	-0.0887984	0.0181	9.2957e-07	-0.0208	0.0143	0.1455	88.2985
BD	fibroblast growth factor 23	rs6090435	A	G	0.497	-0.0754997	0.015	4.82073e-07	-0.0053	0.0112	0.6368	147.789
BD	fibroblast growth factor 23	rs60960031	A	G	0.4076	-0.0608015	0.0137	9.07705e-06	0.0218	0.0105	0.0382798	92.4787
BD	fibroblast growth factor 23	rs6102677	T	C	0.6869	-0.0679042	0.0148	4.47255e-06	0.0054	0.0116	0.6398	102.759
BD	fibroblast growth factor 23	rs6130775	T	C	0.4821	0.0650009	0.0137	2.08927e-06	-0.0013	0.0111	0.9064	109.327
BD	fibroblast growth factor 23	rs62433108	T	G	0.7167	-0.0683003	0.0148	3.93319e-06	-0.0176	0.0113	0.1182	98.1386
BD	fibroblast growth factor 23	rs62535709	T	C	0.0507	0.129404	0.0284	5.20171e-06	0.0063	0.0241	0.7944	83.4826
BD	fibroblast growth factor 23	rs66506713	T	C	0.3738	0.0717996	0.0157	4.80279e-06	-0.0222	0.0125	0.0751606	125.093
BD	fibroblast growth factor 23	rs6675366	T	C	0.9563	-0.164898	0.0333	7.34928e-07	0.0202	0.0287	0.4813	117.783
BD	fibroblast growth factor 23	rs6767302	A	G	0.5527	0.0703	0.0135	1.91496e-07	0.0016	0.0106	0.8812	126.663
BD	fibroblast growth factor 23	rs6782248	A	G	0.835	0.0904986	0.0195	3.46803e-06	-0.0215	0.0165	0.191	116.956
BD	fibroblast growth factor 23	rs6788153	T	C	0.9195	0.115799	0.0257	6.61259e-06	0.0807	0.0254	0.00146501	102.851
BD	fibroblast growth factor 23	rs6829845	A	G	0.3459	0.0728972	0.0142	2.84239e-07	0.0011	0.0108	0.916	124.638
BD	fibroblast growth factor 23	rs71395455	A	G	0.7117	0.082096	0.0146	1.87656e-08	0.0082	0.0115	0.4774	143.409
BD	fibroblast growth factor 23	rs72673100	A	C	0.4473	-0.0713027	0.0149	1.70635e-06	0.0093	0.0117	0.4308	130.311
BD	fibroblast growth factor 23	rs735931	A	G	0.505	0.0669014	0.0138	1.2476e-06	0.0077	0.0119	0.5158	115.965
BD	fibroblast growth factor 23	rs7406066	A	G	0.5308	-0.0613968	0.0136	6.34752e-06	0.0069	0.0104	0.5062	97.2712
BD	fibroblast growth factor 23	rs7613933	A	G	0.4742	-0.0665993	0.0137	1.16639e-06	-0.0028	0.0114	0.8083	114.623
BD	fibroblast growth factor 23	rs7708829	A	G	0.5567	0.064701	0.0135	1.64578e-06	0.0031	0.0114	0.7848	107.06
BD	fibroblast growth factor 23	rs77516904	A	G	0.9652	-0.170006	0.0355	1.67704e-06	-0.0224	0.0328	0.4945	100.59
BD	fibroblast growth factor 23	rs7915021	T	C	0.1173	-0.0992017	0.02	7.04616e-07	-0.0233	0.0153	0.1274	105.59
BD	fibroblast growth factor 23	rs7916271	T	C	0.5249	-0.070401	0.0141	5.9455e-07	-0.0107	0.012	0.3708	128.139
BD	fibroblast growth factor 23	rs7969091	A	G	0.5825	-0.0692	0.0135	2.96075e-07	-0.0114	0.0105	0.2762	120.716
BD	fibroblast growth factor 23	rs80148877	T	C	0.9085	-0.150497	0.0309	1.11336e-06	0.0271	0.0252	0.2816	195.447
BD	fibroblast growth factor 23	rs8067817	T	C	0.5427	0.0683967	0.0136	4.92611e-07	0.0203	0.0102	0.04705	120.345
BD	fibroblast growth factor 23	rs814197	T	G	0.5726	-0.0704976	0.0134	1.43264e-07	0.0025	0.0103	0.8086	126.09
BD	fibroblast growth factor 23	rs884301	T	C	0.3728	0.0802981	0.0138	5.93071e-09	0.0071	0.0113	0.5306	156.384
BD	fibroblast growth factor 23	rs9360500	A	C	0.4394	0.0608975	0.0135	6.45447e-06	-0.0042	0.0106	0.6945	94.6443
BD	fibroblast growth factor 23	rs9371601	T	G	0.3708	0.0664991	0.0139	1.71749e-06	-0.0078	0.0106	0.4617	106.917
BD	fibroblast growth factor 23	rs9372316	A	G	0.7535	-0.0686001	0.0155	9.608e-06	-0.0077	0.012	0.5199	90.5518
BD	fibroblast growth factor 23	rs976498	T	C	0.83	0.0935996	0.0188	6.40116e-07	-0.0052	0.0145	0.7183	128.156
BD	fibroblast growth factor 23	rs9834970	T	C	0.4891	-0.101003	0.0134	4.78832e-14	0.0053	0.0104	0.6088	264.98
BD	Parathyroid hormone	rs10035291	T	C	0.6799	0.0778958	0.0147	1.16417e-07	-0.025	0.026	0.338844	136.929
BD	Parathyroid hormone	rs10075788	A	G	0.6282	-0.0711953	0.0143	6.40154e-07	-0.0156	0.0255	0.537032	122.723
BD	Parathyroid hormone	rs1007893	T	C	0.4771	-0.0620031	0.0134	3.70831e-06	-0.0065	0.0246	0.794328	99.3747
BD	Parathyroid hormone	rs10092482	T	C	0.2018	0.0837987	0.0172	1.10464e-06	-0.0237	0.0325	0.467735	117.241
BD	Parathyroid hormone	rs10106152	T	C	0.2972	-0.0900013	0.0186	1.30639e-06	-0.0013	0.0284	0.954993	175.565
BD	Parathyroid hormone	rs10120508	A	G	0.7157	-0.0726997	0.0148	9.00858e-07	-0.0289	0.0279	0.301995	111.454
BD	Parathyroid hormone	rs10136228	A	G	0.5388	-0.060196	0.0134	7.04792e-06	-0.0163	0.0248	0.512861	93.2872
BD	Parathyroid hormone	rs10147900	T	C	0.1779	0.1308	0.0255	2.90639e-07	-0.0174	0.0335	0.60256	260.066
BD	Parathyroid hormone	rs10410775	T	C	0.3936	-0.0641972	0.0144	8.26731e-06	-0.0203	0.0263	0.446684	101.927
BD	Parathyroid hormone	rs10492859	A	G	0.7903	0.0732969	0.016	4.62629e-06	-0.0389	0.0294	0.186209	92.2409
BD	Parathyroid hormone	rs10744560	T	C	0.325	0.0832008	0.014	2.8e-09	0.0206	0.0264	0.436516	157.525
BD	Parathyroid hormone	rs10745843	A	G	0.5845	0.0701975	0.0138	3.64206e-07	-0.0052	0.0259	0.831764	124.059
BD	Parathyroid hormone	rs10873527	T	C	0.6451	0.0660967	0.0148	7.96986e-06	-0.0276	0.0264	0.295121	103.645
BD	Parathyroid hormone	rs10878840	A	G	0.6123	-0.0636962	0.0138	3.91834e-06	-0.018	0.0255	0.47863	99.7958
BD	Parathyroid hormone	rs10896095	A	G	0.8062	0.087901	0.0172	3.2127e-07	-0.0187	0.032	0.562341	125.147
BD	Parathyroid hormone	rs10950456	A	G	0.5656	0.065104	0.0138	2.38549e-06	-0.0417	0.0245	0.0891251	107.921
BD	Parathyroid hormone	rs11097326	A	G	0.2903	0.0713993	0.0149	1.65209e-06	-0.0005	0.0273	0.977237	108.846
BD	Parathyroid hormone	rs111444407	T	C	0.161	0.1166	0.0184	2.34339e-10	-0.0346	0.035	0.323594	190.621
BD	Parathyroid hormone	rs11191356	A	G	0.9056	0.106097	0.0235	6.33836e-06	0.0263	0.046	0.562341	99.7105
BD	Parathyroid hormone	rs113583672	A	G	0.9314	-0.123604	0.0249	6.90546e-07	0.027	0.0461	0.562341	101.149
BD	Parathyroid hormone	rs113779084	A	G	0.2883	0.0656005	0.0146	7.01668e-06	0.0087	0.028	0.758578	91.4767
BD	Parathyroid hormone	rs11557713	A	G	0.2634	0.0717996	0.0148	1.2264e-06	-0.0142	0.0274	0.60256	103.645
BD	Parathyroid hormone	rs11624408	A	G	0.5477	0.0638007	0.0138	3.77787e-06	0.0279	0.025	0.263027	104.493
BD	Parathyroid hormone	rs11647445	T	G	0.6272	-0.074896	0.0142	1.33217e-07	-0.0223	0.0261	0.389045	135.996
BD	Parathyroid hormone	rs11724116	T	C	0.1491	-0.104095	0.0188	3.07785e-08	0.0115	0.0331	0.724436	142.56
BD	Parathyroid hormone	rs1180221	T	C	0.4145	0.0934995	0.0205	5.0923e-06	-0.015	0.0251	0.549541	220.345
BD	Parathyroid hormone	rs12063329	T	C	0.831	0.0911013	0.0181	4.82302e-07	0.0131	0.0339	0.691831	120.82
BD	Parathyroid hormone	rs12135727	T	C	0.2028	-0.0761038	0.0165	3.98138e-06	-0.0284	0.0296	0.338844	97.0174
BD	Parathyroid hormone	rs12153740	T	C	0.1869	-0.0801044	0.0163	8.90644e-07	-0.0068	0.0339	0.851138	101.042
BD	Parathyroid hormone	rs12287648	A	G	0.173	-0.089695	0.0182	8.29502e-07	0.0182	0.032	0.57544	119.31
BD	Parathyroid hormone	rs12474837	A	C	0.9235	-0.138802	0.0287	1.32264e-06	0.012	0.0517	0.812831	141.144
BD	Parathyroid hormone	rs12538191	A	G	0.2316	-0.0957953	0.0182	1.41356e-07	-0.0014	0.0278	0.954993	169.443
BD	Parathyroid hormone	rs12563424	T	C	0.6421	-0.0697038	0.0139	5.3126e-07	0.0269	0.0262	0.301995	115.727
BD	Parathyroid hormone	rs12621381	A	C	0.5746	-0.0677972	0.0139	1.07442e-06	0.0075	0.0249	0.758578	116.453
BD	Parathyroid hormone	rs12672003	A	G	0.8917	-0.116197	0.0209	2.70308e-08	-0.0346	0.0394	0.380189	135.194
BD	Parathyroid hormone	rs12677998	A	G	0.1292	-0.120102	0.0247	1.15955e-06	-0.0009	0.0389	0.977237	168.376
BD	Parathyroid hormone	rs12751064	T	C	0.2674	-0.0736035	0.0149	7.81903e-07	0.0214	0.0271	0.426581	109.986
BD	Parathyroid hormone	rs1278516	A	G	0.1014	-0.113001	0.0226	5.73206e-07	-0.0325	0.0414	0.436516	120.605
BD	Parathyroid hormone	rs12898460	T	C	0.2634	-0.0789999	0.0146	6.26901e-08	-0.0007	0.0266	0.977237	125.528
BD	Parathyroid hormone	rs13011184	A	G	0.9841	-0.247103	0.0557	9.15076e-06	0.0439	0.1055	0.676083	98.9947
BD	Parathyroid hormone	rs138321	A	G	0.5149	0.0793009	0.0135	4.25043e-09	0.0517	0.025	0.0389045	162.954
BD	Parathyroid hormone	rs145120286	A	G	0.0706	-0.129596	0.0289	7.31535e-06	0.0642	0.0508	0.204174	114.219
BD	Parathyroid hormone	rs148624439	T	C	0.1819	-0.0822952	0.0181	5.4494e-06	0.0158	0.0327	0.630957	104.437
BD	Parathyroid hormone	rs16842765	A	G	0.2932	-0.0665993	0.0145	4.36802e-06	0.0032	0.0264	0.912011	95.2329
BD	Parathyroid hormone	rs17183814	A	G	0.0567	-0.140896	0.0268	1.46187e-07	0.0973	0.0461	0.0346737	110.037
BD	Parathyroid hormone	rs174592	A	G	0.6133	-0.0773995	0.0141	4.03464e-08	0.0415	0.0254	0.102329	147.349
BD	Parathyroid hormone	rs1819204	A	G	0.7644	0.080704	0.0162	6.30183e-07	0.0294	0.0302	0.331131	121.589
BD	Parathyroid hormone	rs1850	T	C	0.6292	-0.0752948	0.0143	1.39905e-07	-0.0156	0.0261	0.549541	137.15
BD	Parathyroid hormone	rs189574365	A	C	0.0219	0.206803	0.0435	1.99346e-06	0.0026	0.0756	0.977237	94.9127
BD	Parathyroid hormone	rs2305929	A	G	0.8002	-0.0953992	0.0176	5.94631e-08	0.0725	0.0326	0.0263027	150.917
BD	Parathyroid hormone	rs2388334	A	G	0.4911	-0.0713027	0.0133	8.2715e-08	-0.0014	0.0249	0.954993	131.737
BD	Parathyroid hormone	rs2719169	A	G	0.4095	-0.0739049	0.0138	8.53538e-08	0.0422	0.0251	0.0933254	136.948
BD	Parathyroid hormone	rs28565152	A	G	0.2187	0.0802981	0.0158	3.73175e-07	0.0155	0.0285	0.588844	114.189
BD	Parathyroid hormone	rs28627084	T	C	0.1173	-0.0979988	0.0217	6.29969e-06	0.0258	0.0381	0.501187	103.04
BD	Parathyroid hormone	rs3110496	A	G	0.336	-0.0649973	0.0144	6.3706e-06	0.0071	0.0264	0.794328	97.6574
BD	Parathyroid hormone	rs325380	A	C	0.4473	-0.0648052	0.0137	2.24179e-06	-0.004	0.0254	0.870964	107.597
BD	Parathyroid hormone	rs329319	A	G	0.4254	0.0788019	0.0139	1.43462e-08	0.0285	0.0264	0.281838	157.451
BD	Parathyroid hormone	rs34520165	T	C	0.4433	0.0743001	0.0156	1.909e-06	0.0332	0.025	0.186209	141.277
BD	Parathyroid hormone	rs34568676	A	G	0.2247	0.0744022	0.0159	2.87737e-06	0.0093	0.0285	0.74131	99.9242
BD	Parathyroid hormone	rs35955717	T	C	0.8718	0.0945008	0.0198	1.81713e-06	-0.0227	0.0345	0.512861	103.426
BD	Parathyroid hormone	rs36034627	T	G	0.173	-0.0786969	0.0171	4.18131e-06	0.0115	0.0299	0.707946	91.7964
BD	Parathyroid hormone	rs3804640	A	G	0.5477	0.071902	0.0135	1.00359e-07	-0.0358	0.0255	0.162181	132.786
BD	Parathyroid hormone	rs4301023	T	C	0.4682	0.0603987	0.0134	6.56371e-06	-0.0091	0.0247	0.707946	94.105
BD	Parathyroid hormone	rs4595478	T	C	0.1889	0.0927979	0.0178	1.85443e-07	-0.0042	0.0328	0.891251	136.81
BD	Parathyroid hormone	rs4652746	A	G	0.1302	0.0919044	0.0191	1.49616e-06	-0.0387	0.0353	0.275423	99.1111
BD	Parathyroid hormone	rs4869118	T	C	0.5427	-0.0601004	0.0135	8.51216e-06	0.0235	0.025	0.346737	92.8715
BD	Parathyroid hormone	rs55648125	A	G	0.9016	-0.117096	0.0215	5.1424e-08	-0.0531	0.042	0.204174	126.106
BD	Parathyroid hormone	rs56351137	T	C	0.0557	0.139397	0.0312	7.90128e-06	0.0596	0.053	0.263027	105.912
BD	Parathyroid hormone	rs56412041	A	C	0.339	0.0691995	0.0147	2.50835e-06	-0.0245	0.0273	0.371535	111.206
BD	Parathyroid hormone	rs570098	T	G	0.5	-0.0652961	0.0138	2.22752e-06	-0.0285	0.025	0.251189	110.466
BD	Parathyroid hormone	rs57681866	A	G	0.0596	-0.161402	0.0296	4.9592e-08	0.0362	0.0486	0.457088	151.438
BD	Parathyroid hormone	rs57957974	A	C	0.3698	0.0729995	0.0145	4.79227e-07	0.0132	0.0261	0.616595	128.752
BD	Parathyroid hormone	rs6051659	A	G	0.827	-0.0837947	0.0183	4.67322e-06	-0.0106	0.0327	0.74131	104.099
BD	Parathyroid hormone	rs6060023	T	C	0.1233	-0.0887984	0.0181	9.2957e-07	-0.0627	0.0334	0.060256	88.2985
BD	Parathyroid hormone	rs6090435	A	G	0.497	-0.0754997	0.015	4.82073e-07	-0.0207	0.0251	0.40738	147.789
BD	Parathyroid hormone	rs60960031	A	G	0.4076	-0.0608015	0.0137	9.07705e-06	-0.0028	0.0258	0.912011	92.4787
BD	Parathyroid hormone	rs6102677	T	C	0.6869	-0.0679042	0.0148	4.47255e-06	-0.0147	0.0269	0.588844	102.759
BD	Parathyroid hormone	rs6130775	T	C	0.4821	0.0650009	0.0137	2.08927e-06	-0.0037	0.025	0.891251	109.327
BD	Parathyroid hormone	rs62433108	T	G	0.7167	-0.0683003	0.0148	3.93319e-06	0.0276	0.0272	0.30903	98.1386
BD	Parathyroid hormone	rs62535709	T	C	0.0507	0.129404	0.0284	5.20171e-06	0.0077	0.0526	0.891251	83.4826
BD	Parathyroid hormone	rs66506713	T	C	0.3738	0.0717996	0.0157	4.80279e-06	0.0002	0.0264	1	125.093
BD	Parathyroid hormone	rs6675366	T	C	0.9563	-0.164898	0.0333	7.34928e-07	-0.0189	0.0637	0.758578	117.783
BD	Parathyroid hormone	rs6767302	A	G	0.5527	0.0703	0.0135	1.91496e-07	0.0249	0.0245	0.30903	126.663
BD	Parathyroid hormone	rs6782248	A	G	0.835	0.0904986	0.0195	3.46803e-06	0.0087	0.0354	0.812831	116.956
BD	Parathyroid hormone	rs6788153	T	C	0.9195	0.115799	0.0257	6.61259e-06	0.0387	0.0482	0.426581	102.851
BD	Parathyroid hormone	rs6829845	A	G	0.3459	0.0728972	0.0142	2.84239e-07	-0.0273	0.027	0.30903	124.638
BD	Parathyroid hormone	rs71395455	A	G	0.7117	0.082096	0.0146	1.87656e-08	0.0211	0.0274	0.436516	143.409
BD	Parathyroid hormone	rs72673100	A	C	0.4473	-0.0713027	0.0149	1.70635e-06	0.0098	0.0264	0.707946	130.311
BD	Parathyroid hormone	rs735931	A	G	0.505	0.0669014	0.0138	1.2476e-06	0.0254	0.0248	0.30903	115.965
BD	Parathyroid hormone	rs7406066	A	G	0.5308	-0.0613968	0.0136	6.34752e-06	-0.0169	0.0248	0.501187	97.2712
BD	Parathyroid hormone	rs7613933	A	G	0.4742	-0.0665993	0.0137	1.16639e-06	0.0216	0.0259	0.40738	114.623
BD	Parathyroid hormone	rs7708829	A	G	0.5567	0.064701	0.0135	1.64578e-06	0.0002	0.0249	1	107.06
BD	Parathyroid hormone	rs77516904	A	G	0.9652	-0.170006	0.0355	1.67704e-06	0.037	0.0636	0.562341	100.59
BD	Parathyroid hormone	rs7915021	T	C	0.1173	-0.0992017	0.02	7.04616e-07	-0.0008	0.0366	0.977237	105.59
BD	Parathyroid hormone	rs7916271	T	C	0.5249	-0.070401	0.0141	5.9455e-07	-0.0374	0.0254	0.141254	128.139
BD	Parathyroid hormone	rs7969091	A	G	0.5825	-0.0692	0.0135	2.96075e-07	-0.0164	0.025	0.512861	120.716
BD	Parathyroid hormone	rs80148877	T	C	0.9085	-0.150497	0.0309	1.11336e-06	-0.0625	0.0503	0.213796	195.447
BD	Parathyroid hormone	rs8067817	T	C	0.5427	0.0683967	0.0136	4.92611e-07	0.0086	0.025	0.724436	120.345
BD	Parathyroid hormone	rs814197	T	G	0.5726	-0.0704976	0.0134	1.43264e-07	0.0158	0.0249	0.524807	126.09
BD	Parathyroid hormone	rs884301	T	C	0.3728	0.0802981	0.0138	5.93071e-09	0.022	0.0261	0.398107	156.384
BD	Parathyroid hormone	rs9360500	A	C	0.4394	0.0608975	0.0135	6.45447e-06	-0.0385	0.0246	0.11749	94.6443
BD	Parathyroid hormone	rs9371601	T	G	0.3708	0.0664991	0.0139	1.71749e-06	-0.0072	0.0258	0.776247	106.917
BD	Parathyroid hormone	rs9372316	A	G	0.7535	-0.0686001	0.0155	9.608e-06	0.0151	0.0287	0.60256	90.5518
BD	Parathyroid hormone	rs976498	T	C	0.83	0.0935996	0.0188	6.40116e-07	0.0372	0.0321	0.245471	128.156
BD	Parathyroid hormone	rs9834970	T	C	0.4891	-0.101003	0.0134	4.78832e-14	0.0377	0.0251	0.131826	264.98
AN	Serum 25-Hydroxyvitamin D levels	rs111925923	T	C	0.0378	0.409497	0.089	4.2e-06	-0.002297	0.005813	0.692816	178.709
AN	Serum 25-Hydroxyvitamin D levels	rs11245454	A	G	0.2644	-0.154306	0.0333	3.59e-06	-0.003626	0.002162	0.093476	135.29
AN	Serum 25-Hydroxyvitamin D levels	rs113547960	A	C	0.9185	-0.261702	0.0575	5.33e-06	-0.002115	0.003315	0.523467	149.93
AN	Serum 25-Hydroxyvitamin D levels	rs115593095	A	G	0.5855	-0.136198	0.0299	5.24e-06	-0.05589	0.027018	0.0386011	131.486
AN	Serum 25-Hydroxyvitamin D levels	rs117957029	T	C	0.9811	-0.536502	0.1024	1.61e-07	-0.011521	0.006984	0.0990399	156.149
AN	Serum 25-Hydroxyvitamin D levels	rs12303423	A	G	0.5706	0.134802	0.0296	5.26e-06	-0.001471	0.001944	0.449326	130.025
AN	Serum 25-Hydroxyvitamin D levels	rs13125782	T	C	0.2127	0.174802	0.0356	9.1e-07	-0.001047	0.002379	0.659711	149.632
AN	Serum 25-Hydroxyvitamin D levels	rs1338456	A	G	0.9344	-0.260806	0.059	9.85e-06	0.001754	0.004298	0.683194	121.694
AN	Serum 25-Hydroxyvitamin D levels	rs143970333	T	C	0.0139	0.548699	0.1215	6.3e-06	0.007253	0.008529	0.395121	120.438
AN	Serum 25-Hydroxyvitamin D levels	rs145106667	A	G	0.9891	-0.686291	0.1483	3.7e-06	0.002748	0.01078	0.798815	148.482
AN	Serum 25-Hydroxyvitamin D levels	rs1803439	A	G	0.665	0.138204	0.0311	8.84e-06	-0.002371	0.002078	0.253688	124.216
AN	Serum 25-Hydroxyvitamin D levels	rs1894792	T	C	0.7306	0.172599	0.0364	2.12e-06	0.000162	0.002327	0.944583	171.727
AN	Serum 25-Hydroxyvitamin D levels	rs200312312	T	C	0.7008	0.180603	0.0335	7e-08	-0.000685	0.002217	0.757401	200.7
AN	Serum 25-Hydroxyvitamin D levels	rs2345557	T	G	0.0746	0.237299	0.051	3.27e-06	-0.004072	0.00353	0.248624	113.399
AN	Serum 25-Hydroxyvitamin D levels	rs312868	T	C	0.1074	-0.238701	0.0524	5.23e-06	0.00081	0.003408	0.812201	159.845
AN	Serum 25-Hydroxyvitamin D levels	rs4622308	T	C	0.5527	-0.180096	0.0307	4.46e-09	0.001804	0.002077	0.385226	235.872
AN	Serum 25-Hydroxyvitamin D levels	rs490019	A	G	0.172	0.1793	0.0399	7e-06	0.003334	0.002721	0.220339	133.744
AN	Serum 25-Hydroxyvitamin D levels	rs56235857	T	C	0.6839	-0.155298	0.0351	9.67e-06	-0.004254	0.002402	0.0766284	152.496
AN	Serum 25-Hydroxyvitamin D levels	rs6857911	T	C	0.8062	-0.155999	0.035	8.31e-06	0.001859	0.002384	0.435635	110.896
AN	Serum 25-Hydroxyvitamin D levels	rs6867019	T	G	0.4583	0.132799	0.0295	6.74e-06	0.001834	0.002049	0.370783	127.842
AN	Serum 25-Hydroxyvitamin D levels	rs690197	T	C	0.7207	0.1471	0.0328	7.3e-06	-0.0015	0.002141	0.48352	127.177
AN	Serum 25-Hydroxyvitamin D levels	rs73167213	A	G	0.0616	-0.315999	0.0706	7.61e-06	-0.000467	0.004301	0.913553	169.022
AN	Serum 25-Hydroxyvitamin D levels	rs75307524	A	G	0.9751	-0.474397	0.101	2.64e-06	0.015362	0.007024	0.0287521	159.906
AN	Serum 25-Hydroxyvitamin D levels	rs75544652	T	C	0.0119	0.5223	0.112	3.11e-06	0.009331	0.008607	0.278286	93.4417
AN	Serum 25-Hydroxyvitamin D levels	rs76276559	A	G	0.4245	-0.145801	0.0321	5.57e-06	0.003341	0.002121	0.115283	151.892
AN	Serum 25-Hydroxyvitamin D levels	rs78589465	T	C	0.0179	0.4943	0.1099	6.87e-06	0.009876	0.007471	0.186207	125.399
AN	Serum 25-Hydroxyvitamin D levels	rs79350580	T	C	0.0447	0.309196	0.0666	3.44e-06	0.004846	0.004236	0.25256	119.134
AN	fibroblast growth factor 23	rs111925923	T	C	0.0378	0.409497	0.089	4.20287e-06	0.0313	0.0337	0.3522	178.709
AN	fibroblast growth factor 23	rs11245454	A	G	0.2644	-0.154306	0.0333	3.59006e-06	0.0308	0.0121	0.0107199	135.29
AN	fibroblast growth factor 23	rs113547960	A	C	0.9185	-0.261702	0.0575	5.33034e-06	0.005	0.0214	0.8153	149.93
AN	fibroblast growth factor 23	rs115593095	A	G	0.5855	-0.136198	0.0299	5.23581e-06	0.0391	0.0157	0.0125901	131.486
AN	fibroblast growth factor 23	rs117957029	T	C	0.9811	-0.536502	0.1024	1.61203e-07	0.0142	0.0411	0.730099	156.149
AN	fibroblast growth factor 23	rs12303423	A	G	0.5706	0.134802	0.0296	5.26063e-06	-0.0176	0.0113	0.1187	130.025
AN	fibroblast growth factor 23	rs13125782	T	C	0.2127	0.174802	0.0356	9.10022e-07	0.0046	0.0141	0.7472	149.632
AN	fibroblast growth factor 23	rs1338456	A	G	0.9344	-0.260806	0.059	9.84961e-06	-0.0321	0.0251	0.2021	121.694
AN	fibroblast growth factor 23	rs143970333	T	C	0.0139	0.548699	0.1215	6.30057e-06	0.0782	0.0578	0.1762	120.438
AN	fibroblast growth factor 23	rs145106667	A	G	0.9891	-0.686291	0.1483	3.69715e-06	0.091	0.0626	0.1459	148.482
AN	fibroblast growth factor 23	rs1803439	A	G	0.665	0.138204	0.0311	8.8357e-06	-0.0097	0.0115	0.4	124.216
AN	fibroblast growth factor 23	rs1894792	T	C	0.7306	0.172599	0.0364	2.11887e-06	-0.0195	0.0138	0.1587	171.727
AN	fibroblast growth factor 23	rs200312312	T	C	0.7008	0.180603	0.0335	7.00095e-08	-0.0317	0.017	0.0620998	200.7
AN	fibroblast growth factor 23	rs2345557	T	G	0.0746	0.237299	0.051	3.27268e-06	0.029	0.0188	0.1224	113.399
AN	fibroblast growth factor 23	rs312868	T	C	0.1074	-0.238701	0.0524	5.22932e-06	0.0263	0.0205	0.1987	159.845
AN	fibroblast growth factor 23	rs4622308	T	C	0.5527	-0.180096	0.0307	4.45573e-09	0.0041	0.0157	0.7952	235.872
AN	fibroblast growth factor 23	rs490019	A	G	0.172	0.1793	0.0399	6.99822e-06	-0.019	0.0155	0.22	133.744
AN	fibroblast growth factor 23	rs56235857	T	C	0.6839	-0.155298	0.0351	9.66907e-06	-0.0255	0.0183	0.1646	152.496
AN	fibroblast growth factor 23	rs62320810	A	C	0.8837	-0.1961	0.0434	6.22986e-06	0.0213	0.0166	0.199	115.304
AN	fibroblast growth factor 23	rs6857911	T	C	0.8062	-0.155999	0.035	8.30697e-06	-0.0023	0.014	0.8683	110.896
AN	fibroblast growth factor 23	rs6867019	T	G	0.4583	0.132799	0.0295	6.74285e-06	0.0181	0.0155	0.2414	127.842
AN	fibroblast growth factor 23	rs690197	T	C	0.7207	0.1471	0.0328	7.29956e-06	0.0061	0.0121	0.611299	127.177
AN	fibroblast growth factor 23	rs73167213	A	G	0.0616	-0.315999	0.0706	7.60865e-06	0.0146	0.0243	0.548001	169.022
AN	fibroblast growth factor 23	rs75115477	A	G	0.9334	-0.277204	0.0593	2.94526e-06	-0.0181	0.026	0.487401	139.594
AN	fibroblast growth factor 23	rs75307524	A	G	0.9751	-0.474397	0.101	2.64007e-06	0.0648	0.0421	0.1238	159.906
AN	fibroblast growth factor 23	rs75544652	T	C	0.0119	0.5223	0.112	3.11044e-06	0.0609	0.0533	0.2528	93.4417
AN	fibroblast growth factor 23	rs76276559	A	G	0.4245	-0.145801	0.0321	5.5703e-06	-0.0258	0.0163	0.1121	151.892
AN	fibroblast growth factor 23	rs78589465	T	C	0.0179	0.4943	0.1099	6.86849e-06	-0.0401	0.0472	0.3957	125.399
AN	fibroblast growth factor 23	rs79350580	T	C	0.0447	0.309196	0.0666	3.44069e-06	-0.0053	0.0268	0.8433	119.134
AN	Parathyroid hormone	rs111925923	T	C	0.0378	0.409497	0.089	4.20287e-06	0.0309	0.0735	0.676083	178.709
AN	Parathyroid hormone	rs11245454	A	G	0.2644	-0.154306	0.0333	3.59006e-06	-0.0182	0.0278	0.512861	135.29
AN	Parathyroid hormone	rs113547960	A	C	0.9185	-0.261702	0.0575	5.33034e-06	-0.039	0.0427	0.363078	149.93
AN	Parathyroid hormone	rs115593095	A	G	0.5855	-0.136198	0.0299	5.23581e-06	-0.0109	0.0256	0.676083	131.486
AN	Parathyroid hormone	rs117957029	T	C	0.9811	-0.536502	0.1024	1.61203e-07	0.0054	0.0841	0.954993	156.149
AN	Parathyroid hormone	rs12303423	A	G	0.5706	0.134802	0.0296	5.26063e-06	0.004	0.0248	0.870964	130.025
AN	Parathyroid hormone	rs13125782	T	C	0.2127	0.174802	0.0356	9.10022e-07	0.0133	0.0319	0.676083	149.632
AN	Parathyroid hormone	rs1338456	A	G	0.9344	-0.260806	0.059	9.84961e-06	-0.0314	0.0524	0.549541	121.694
AN	Parathyroid hormone	rs143970333	T	C	0.0139	0.548699	0.1215	6.30057e-06	-0.1807	0.1238	0.144544	120.438
AN	Parathyroid hormone	rs145106667	A	G	0.9891	-0.686291	0.1483	3.69715e-06	-0.0137	0.1276	0.912011	148.482
AN	Parathyroid hormone	rs1803439	A	G	0.665	0.138204	0.0311	8.8357e-06	-0.0187	0.0265	0.47863	124.216
AN	Parathyroid hormone	rs1894792	T	C	0.7306	0.172599	0.0364	2.11887e-06	-0.0288	0.0296	0.331131	171.727
AN	Parathyroid hormone	rs200312312	T	C	0.7008	0.180603	0.0335	7.00095e-08	-0.0035	0.0275	0.891251	200.7
AN	Parathyroid hormone	rs2345557	T	G	0.0746	0.237299	0.051	3.27268e-06	-0.0207	0.0436	0.630957	113.399
AN	Parathyroid hormone	rs312868	T	C	0.1074	-0.238701	0.0524	5.22932e-06	-0.0201	0.0439	0.645654	159.845
AN	Parathyroid hormone	rs4622308	T	C	0.5527	-0.180096	0.0307	4.45573e-09	0.0105	0.0249	0.676083	235.872
AN	Parathyroid hormone	rs490019	A	G	0.172	0.1793	0.0399	6.99822e-06	0.0336	0.0356	0.346737	133.744
AN	Parathyroid hormone	rs56235857	T	C	0.6839	-0.155298	0.0351	9.66907e-06	0.0329	0.0297	0.269153	152.496
AN	Parathyroid hormone	rs62320810	A	C	0.8837	-0.1961	0.0434	6.22986e-06	0.0184	0.0369	0.616595	115.304
AN	Parathyroid hormone	rs6857911	T	C	0.8062	-0.155999	0.035	8.30697e-06	-0.0295	0.0308	0.338844	110.896
AN	Parathyroid hormone	rs6867019	T	G	0.4583	0.132799	0.0295	6.74285e-06	-0.0012	0.0248	0.954993	127.842
AN	Parathyroid hormone	rs690197	T	C	0.7207	0.1471	0.0328	7.29956e-06	0.0207	0.0276	0.457088	127.177
AN	Parathyroid hormone	rs73167213	A	G	0.0616	-0.315999	0.0706	7.60865e-06	-0.0247	0.0552	0.660693	169.022
AN	Parathyroid hormone	rs75115477	A	G	0.9334	-0.277204	0.0593	2.94526e-06	-0.0132	0.0555	0.812831	139.594
AN	Parathyroid hormone	rs75307524	A	G	0.9751	-0.474397	0.101	2.64007e-06	-0.0856	0.084	0.30903	159.906
AN	Parathyroid hormone	rs75544652	T	C	0.0119	0.5223	0.112	3.11044e-06	-0.1604	0.1059	0.128825	93.4417
AN	Parathyroid hormone	rs76276559	A	G	0.4245	-0.145801	0.0321	5.5703e-06	0.0067	0.0263	0.794328	151.892
AN	Parathyroid hormone	rs78589465	T	C	0.0179	0.4943	0.1099	6.86849e-06	0.0204	0.102	0.851138	125.399
AN	Parathyroid hormone	rs79350580	T	C	0.0447	0.309196	0.0666	3.44069e-06	-0.008	0.0536	0.870964	119.134
TS	Serum 25-Hydroxyvitamin D levels	rs11075471	T	C	0.9871	-0.491	0.1059	3.54e-06	0.008976	0.008938	0.315265	88.3703
TS	Serum 25-Hydroxyvitamin D levels	rs115422340	A	G	0.0239	-0.451	0.1	6.48e-06	-0.009465	0.007027	0.177942	137.058
TS	Serum 25-Hydroxyvitamin D levels	rs117648881	A	G	0.0179	-0.5232	0.1064	8.77e-07	-0.002765	0.006956	0.691029	139.015
TS	Serum 25-Hydroxyvitamin D levels	rs12459560	T	G	0.1551	0.177502	0.036	8.2e-07	-0.000454	0.002604	0.861513	119.108
TS	Serum 25-Hydroxyvitamin D levels	rs139480	T	C	0.671	0.125504	0.0276	5.43e-06	-0.005071	0.002055	0.0136141	100.181
TS	Serum 25-Hydroxyvitamin D levels	rs148879093	A	G	0.0447	0.852499	0.1835	3.39e-06	-0.018226	0.006214	0.00336504	946.631
TS	Serum 25-Hydroxyvitamin D levels	rs182078711	T	G	0.0129	0.416201	0.0916	5.53e-06	-0.004322	0.008646	0.617187	63.3861
TS	Serum 25-Hydroxyvitamin D levels	rs1865896	A	G	0.4911	-0.1215	0.0263	3.84e-06	0.000222	0.001946	0.909081	106.338
TS	Serum 25-Hydroxyvitamin D levels	rs1906252	A	C	0.507	-0.1285	0.0259	7e-07	0.001813	0.001959	0.354675	119.063
TS	Serum 25-Hydroxyvitamin D levels	rs2504235	A	G	0.4056	0.149204	0.0266	2.03e-08	0.002922	0.002023	0.148568	155.219
TS	Serum 25-Hydroxyvitamin D levels	rs35400264	T	C	0.0467	0.2578	0.0567	5.45e-06	0.002493	0.004819	0.604887	85.1545
TS	Serum 25-Hydroxyvitamin D levels	rs4047771	A	C	0.6521	0.140501	0.0299	2.61e-06	-0.004927	0.002112	0.0196549	129.286
TS	Serum 25-Hydroxyvitamin D levels	rs4430756	T	C	0.1511	0.1792	0.0385	3.25e-06	0.006345	0.003102	0.040846	118.825
TS	Serum 25-Hydroxyvitamin D levels	rs6445765	A	C	0.4036	-0.1211	0.027	7.28e-06	0.002012	0.00208	0.333438	101.713
TS	Serum 25-Hydroxyvitamin D levels	rs66489957	T	C	0.7366	0.137603	0.0311	9.66e-06	-0.002589	0.002266	0.253372	105.883
TS	Serum 25-Hydroxyvitamin D levels	rs6670211	A	C	0.4622	-0.1263	0.0262	1.43e-06	0.003616	0.001965	0.0658173	114.35
TS	Serum 25-Hydroxyvitamin D levels	rs66904072	A	G	0.9642	-0.330599	0.0704	2.65e-06	0.000436	0.005894	0.941033	108.758
TS	Serum 25-Hydroxyvitamin D levels	rs72734943	A	G	0.0109	0.716102	0.1557	4.24e-06	0.006233	0.009543	0.513695	159.942
TS	Serum 25-Hydroxyvitamin D levels	rs72853320	A	G	0.1441	0.183396	0.0383	1.68e-06	0.005095	0.002881	0.0769928	119.675
TS	Serum 25-Hydroxyvitamin D levels	rs73205493	T	C	0.3032	0.1501	0.0314	1.75e-06	0.003759	0.002051	0.0668236	137.489
TS	Serum 25-Hydroxyvitamin D levels	rs73307948	T	C	0.1024	0.181997	0.0404	6.64e-06	-0.004314	0.003061	0.158661	87.6353
TS	Serum 25-Hydroxyvitamin D levels	rs7695776	T	C	0.5696	0.119302	0.0262	5.28e-06	0.002192	0.001946	0.259961	100.53
TS	Serum 25-Hydroxyvitamin D levels	rs77313409	A	C	0.0308	0.436699	0.0927	2.47e-06	-0.006174	0.006142	0.314751	164.748
TS	fibroblast growth factor 23	rs11075471	T	C	0.9871	-0.491	0.1059	3.54443e-06	0.0769	0.0493	0.1186	88.3703
TS	fibroblast growth factor 23	rs115422340	A	G	0.0239	-0.451	0.1	6.48284e-06	-0.0805	0.0439	0.0665595	137.058
TS	fibroblast growth factor 23	rs117648881	A	G	0.0179	-0.5232	0.1064	8.77482e-07	-0.046	0.0469	0.3261	139.015
TS	fibroblast growth factor 23	rs12459560	T	G	0.1551	0.177502	0.036	8.19771e-07	0.0348	0.0142	0.01431	119.108
TS	fibroblast growth factor 23	rs139480	T	C	0.671	0.125504	0.0276	5.43499e-06	-0.0062	0.0111	0.5756	100.181
TS	fibroblast growth factor 23	rs148879093	A	G	0.0447	0.852499	0.1835	3.38812e-06	0.0281	0.0342	0.411	946.631
TS	fibroblast growth factor 23	rs182078711	T	G	0.0129	0.416201	0.0916	5.52819e-06	0.0001	0.0461	0.9976	63.3861
TS	fibroblast growth factor 23	rs1865896	A	G	0.4911	-0.1215	0.0263	3.84158e-06	0.0047	0.0112	0.6743	106.338
TS	fibroblast growth factor 23	rs1906252	A	C	0.507	-0.1285	0.0259	6.99974e-07	-0.0046	0.0102	0.650401	119.063
TS	fibroblast growth factor 23	rs2504235	A	G	0.4056	0.149204	0.0266	2.03288e-08	0.0097	0.0117	0.4066	155.219
TS	fibroblast growth factor 23	rs2708146	A	G	0.5567	0.132702	0.026	3.32663e-07	-0.0144	0.0106	0.1717	125.425
TS	fibroblast growth factor 23	rs35400264	T	C	0.0467	0.2578	0.0567	5.44839e-06	0.0218	0.026	0.4018	85.1545
TS	fibroblast growth factor 23	rs4047771	A	C	0.6521	0.140501	0.0299	2.61408e-06	0.0092	0.0133	0.4901	129.286
TS	fibroblast growth factor 23	rs4430756	T	C	0.1511	0.1792	0.0385	3.24695e-06	-0.0158	0.0175	0.3655	118.825
TS	fibroblast growth factor 23	rs6445765	A	C	0.4036	-0.1211	0.027	7.28455e-06	-0.0218	0.0109	0.0446303	101.713
TS	fibroblast growth factor 23	rs66489957	T	C	0.7366	0.137603	0.0311	9.66495e-06	-0.0323	0.0126	0.0101899	105.883
TS	fibroblast growth factor 23	rs6670211	A	C	0.4622	-0.1263	0.0262	1.43107e-06	-0.0084	0.0109	0.4394	114.35
TS	fibroblast growth factor 23	rs66904072	A	G	0.9642	-0.330599	0.0704	2.65289e-06	0.0042	0.031	0.8918	108.758
TS	fibroblast growth factor 23	rs72734943	A	G	0.0109	0.716102	0.1557	4.24035e-06	-0.0287	0.0617	0.6411	159.942
TS	fibroblast growth factor 23	rs72853320	A	G	0.1441	0.183396	0.0383	1.68111e-06	0.0054	0.0166	0.7433	119.675
TS	fibroblast growth factor 23	rs73205493	T	C	0.3032	0.1501	0.0314	1.75083e-06	0.0022	0.0118	0.8541	137.489
TS	fibroblast growth factor 23	rs73307948	T	C	0.1024	0.181997	0.0404	6.64155e-06	0.0078	0.017	0.6466	87.6353
TS	fibroblast growth factor 23	rs7695776	T	C	0.5696	0.119302	0.0262	5.27589e-06	-0.0131	0.0113	0.2466	100.53
TS	fibroblast growth factor 23	rs77313409	A	C	0.0308	0.436699	0.0927	2.46645e-06	0.0314	0.0347	0.3657	164.748
TS	Parathyroid hormone	rs11075471	T	C	0.9871	-0.491	0.1059	3.54443e-06	-0.0056	0.1197	0.954993	88.3703
TS	Parathyroid hormone	rs115422340	A	G	0.0239	-0.451	0.1	6.48284e-06	-0.001	0.0889	1	137.058
TS	Parathyroid hormone	rs117648881	A	G	0.0179	-0.5232	0.1064	8.77482e-07	0.0578	0.0833	0.489779	139.015
TS	Parathyroid hormone	rs12459560	T	G	0.1551	0.177502	0.036	8.19771e-07	-0.0567	0.0336	0.0912011	119.108
TS	Parathyroid hormone	rs139480	T	C	0.671	0.125504	0.0276	5.43499e-06	0.0123	0.0256	0.630957	100.181
TS	Parathyroid hormone	rs148879093	A	G	0.0447	0.852499	0.1835	3.38812e-06	-0.0106	0.0757	0.891251	946.631
TS	Parathyroid hormone	rs182078711	T	G	0.0129	0.416201	0.0916	5.52819e-06	0.0502	0.1073	0.645654	63.3861
TS	Parathyroid hormone	rs1865896	A	G	0.4911	-0.1215	0.0263	3.84158e-06	0.0034	0.0249	0.891251	106.338
TS	Parathyroid hormone	rs1906252	A	C	0.507	-0.1285	0.0259	6.99974e-07	0.0061	0.0249	0.812831	119.063
TS	Parathyroid hormone	rs2504235	A	G	0.4056	0.149204	0.0266	2.03288e-08	-0.0571	0.0262	0.0295121	155.219
TS	Parathyroid hormone	rs2708146	A	G	0.5567	0.132702	0.026	3.32663e-07	-0.02	0.0254	0.426581	125.425
TS	Parathyroid hormone	rs35400264	T	C	0.0467	0.2578	0.0567	5.44839e-06	0.0157	0.0626	0.794328	85.1545
TS	Parathyroid hormone	rs4047771	A	C	0.6521	0.140501	0.0299	2.61408e-06	0.0165	0.0275	0.549541	129.286
TS	Parathyroid hormone	rs4430756	T	C	0.1511	0.1792	0.0385	3.24695e-06	0.0253	0.0381	0.512861	118.825
TS	Parathyroid hormone	rs6445765	A	C	0.4036	-0.1211	0.027	7.28455e-06	-0.0121	0.027	0.660693	101.713
TS	Parathyroid hormone	rs66489957	T	C	0.7366	0.137603	0.0311	9.66495e-06	0.0604	0.0289	0.0371535	105.883
TS	Parathyroid hormone	rs6670211	A	C	0.4622	-0.1263	0.0262	1.43107e-06	-0.0035	0.0252	0.891251	114.35
TS	Parathyroid hormone	rs66904072	A	G	0.9642	-0.330599	0.0704	2.65289e-06	0.0159	0.0759	0.831764	108.758
TS	Parathyroid hormone	rs72734943	A	G	0.0109	0.716102	0.1557	4.24035e-06	0.0724	0.111	0.512861	159.942
TS	Parathyroid hormone	rs72853320	A	G	0.1441	0.183396	0.0383	1.68111e-06	0.0405	0.0382	0.288403	119.675
TS	Parathyroid hormone	rs73205493	T	C	0.3032	0.1501	0.0314	1.75083e-06	-0.0046	0.0261	0.851138	137.489
TS	Parathyroid hormone	rs73307948	T	C	0.1024	0.181997	0.0404	6.64155e-06	-0.0005	0.0414	1	87.6353
TS	Parathyroid hormone	rs7695776	T	C	0.5696	0.119302	0.0262	5.27589e-06	0.0179	0.025	0.47863	100.53
TS	Parathyroid hormone	rs77313409	A	C	0.0308	0.436699	0.0927	2.46645e-06	0.0445	0.0752	0.549541	164.748
OCD	Serum 25-Hydroxyvitamin D levels	rs1030757	A	C	0.4851	-0.1653	0.0339	1.08193e-06	-0.001405	0.001933	0.467156	134.555
OCD	Serum 25-Hydroxyvitamin D levels	rs10773765	T	C	0.2664	0.183904	0.0404	5.31206e-06	0.000266	0.002218	0.904501	130.252
OCD	Serum 25-Hydroxyvitamin D levels	rs117310268	T	C	0.0557	0.448697	0.0965	3.32402e-06	-0.004502	0.004599	0.327568	210.377
OCD	Serum 25-Hydroxyvitamin D levels	rs12568997	A	G	0.3091	-0.2933	0.058	4.26115e-07	-0.000755	0.002143	0.724725	370.875
OCD	Serum 25-Hydroxyvitamin D levels	rs13141765	T	C	0.4394	-0.2663	0.0558	1.82037e-06	-0.001638	0.00199	0.410468	351.991
OCD	Serum 25-Hydroxyvitamin D levels	rs139286049	A	G	0.9871	-0.601101	0.1345	7.85315e-06	0.004461	0.007253	0.538538	90.3005
OCD	Serum 25-Hydroxyvitamin D levels	rs1652783	A	G	0.7664	-0.2689	0.0594	5.98471e-06	-0.000869	0.002321	0.708332	258.423
OCD	Serum 25-Hydroxyvitamin D levels	rs2482998	A	G	0.659	0.1572	0.0351	7.51196e-06	0.001903	0.002016	0.345254	109.201
OCD	Serum 25-Hydroxyvitamin D levels	rs28599745	A	G	0.163	-0.3629	0.0802	6.04133e-06	-0.003777	0.002878	0.189408	362.419
OCD	Serum 25-Hydroxyvitamin D levels	rs4733767	A	G	0.2734	0.193501	0.039	6.99324e-07	0.001873	0.002208	0.396259	146.824
OCD	Serum 25-Hydroxyvitamin D levels	rs55687617	A	G	0.1352	-0.2702	0.0575	2.61276e-06	3.9e-05	0.003182	0.990292	168.877
OCD	Serum 25-Hydroxyvitamin D levels	rs56025909	T	C	0.0358	0.411898	0.0918	7.22659e-06	0.001322	0.005654	0.815066	115.233
OCD	Serum 25-Hydroxyvitamin D levels	rs639560	T	C	0.0447	-0.4158	0.0879	2.24101e-06	-0.008882	0.00446	0.046474	145.716
OCD	Serum 25-Hydroxyvitamin D levels	rs72781967	T	C	0.7028	-0.1666	0.0353	2.36365e-06	-0.00424	0.002048	0.0384079	114.058
OCD	Serum 25-Hydroxyvitamin D levels	rs72783425	A	C	0.0577	0.339703	0.0733	3.57946e-06	0.004299	0.004042	0.287518	123.56
OCD	Serum 25-Hydroxyvitamin D levels	rs75740353	A	G	0.1093	-0.4326	0.0978	9.7199e-06	-0.001456	0.003192	0.648396	367.684
OCD	Serum 25-Hydroxyvitamin D levels	rs77885126	T	C	0.9881	-0.602501	0.1312	4.38535e-06	0.004338	0.009008	0.63015	83.7175
OCD	Serum 25-Hydroxyvitamin D levels	rs9544927	A	G	0.7763	0.193204	0.0426	5.75216e-06	-0.001919	0.00243	0.429754	127.71
OCD	Serum 25-Hydroxyvitamin D levels	rs9952159	T	C	0.2396	0.182297	0.0396	4.15552e-06	0.001969	0.002385	0.408941	119.181
OCD	fibroblast growth factor 23	rs1030757	A	C	0.4851	-0.1653	0.0339	1.08193e-06	0.0035	0.0109	0.749701	134.555
OCD	fibroblast growth factor 23	rs10773765	T	C	0.2664	0.183904	0.0404	5.31206e-06	0.0203	0.0136	0.1376	130.252
OCD	fibroblast growth factor 23	rs117310268	T	C	0.0557	0.448697	0.0965	3.32402e-06	0.0108	0.0283	0.702301	210.377
OCD	fibroblast growth factor 23	rs12568997	A	G	0.3091	-0.2933	0.058	4.26115e-07	-0.0035	0.0129	0.7851	370.875
OCD	fibroblast growth factor 23	rs13141765	T	C	0.4394	-0.2663	0.0558	1.82037e-06	-0.0119	0.0136	0.3839	351.991
OCD	fibroblast growth factor 23	rs139286049	A	G	0.9871	-0.601101	0.1345	7.85315e-06	0.0159	0.0475	0.7383	90.3005
OCD	fibroblast growth factor 23	rs1652783	A	G	0.7664	-0.2689	0.0594	5.98471e-06	-0.0006	0.0151	0.9658	258.423
OCD	fibroblast growth factor 23	rs2482998	A	G	0.659	0.1572	0.0351	7.51196e-06	0.0173	0.0108	0.1083	109.201
OCD	fibroblast growth factor 23	rs28599745	A	G	0.163	-0.3629	0.0802	6.04133e-06	0.0156	0.0185	0.398	362.419
OCD	fibroblast growth factor 23	rs4733767	A	G	0.2734	0.193501	0.039	6.99324e-07	0.0057	0.012	0.6338	146.824
OCD	fibroblast growth factor 23	rs55687617	A	G	0.1352	-0.2702	0.0575	2.61276e-06	-0.0019	0.0194	0.9204	168.877
OCD	fibroblast growth factor 23	rs56025909	T	C	0.0358	0.411898	0.0918	7.22659e-06	0.0303	0.0356	0.3937	115.233
OCD	fibroblast growth factor 23	rs639560	T	C	0.0447	-0.4158	0.0879	2.24101e-06	-0.0032	0.0275	0.9072	145.716
OCD	fibroblast growth factor 23	rs72781967	T	C	0.7028	-0.1666	0.0353	2.36365e-06	0.0286	0.0119	0.0165402	114.058
OCD	fibroblast growth factor 23	rs72783425	A	C	0.0577	0.339703	0.0733	3.57946e-06	0.0168	0.0244	0.4917	123.56
OCD	fibroblast growth factor 23	rs75740353	A	G	0.1093	-0.4326	0.0978	9.7199e-06	0.028	0.0209	0.1813	367.684
OCD	fibroblast growth factor 23	rs77885126	T	C	0.9881	-0.602501	0.1312	4.38535e-06	0.0469	0.0468	0.3158	83.7175
OCD	fibroblast growth factor 23	rs9544927	A	G	0.7763	0.193204	0.0426	5.75216e-06	0.0142	0.0128	0.2659	127.71
OCD	fibroblast growth factor 23	rs9952159	T	C	0.2396	0.182297	0.0396	4.15552e-06	0.027	0.0137	0.0478498	119.181
OCD	Parathyroid hormone	rs1030757	A	C	0.4851	-0.1653	0.0339	1.08193e-06	-0.0459	0.0249	0.0660693	134.555
OCD	Parathyroid hormone	rs10773765	T	C	0.2664	0.183904	0.0404	5.31206e-06	-0.0062	0.028	0.831764	130.252
OCD	Parathyroid hormone	rs117310268	T	C	0.0557	0.448697	0.0965	3.32402e-06	0.1233	0.0601	0.0398107	210.377
OCD	Parathyroid hormone	rs12568997	A	G	0.3091	-0.2933	0.058	4.26115e-07	0.016	0.0267	0.549541	370.875
OCD	Parathyroid hormone	rs13141765	T	C	0.4394	-0.2663	0.0558	1.82037e-06	0.0073	0.0249	0.776247	351.991
OCD	Parathyroid hormone	rs139286049	A	G	0.9871	-0.601101	0.1345	7.85315e-06	-0.0765	0.0869	0.380189	90.3005
OCD	Parathyroid hormone	rs1652783	A	G	0.7664	-0.2689	0.0594	5.98471e-06	0.0214	0.0306	0.47863	258.423
OCD	Parathyroid hormone	rs2482998	A	G	0.659	0.1572	0.0351	7.51196e-06	0.06	0.0256	0.0190546	109.201
OCD	Parathyroid hormone	rs28599745	A	G	0.163	-0.3629	0.0802	6.04133e-06	0.0125	0.0362	0.724436	362.419
OCD	Parathyroid hormone	rs4733767	A	G	0.2734	0.193501	0.039	6.99324e-07	0.0009	0.0285	0.977237	146.824
OCD	Parathyroid hormone	rs55687617	A	G	0.1352	-0.2702	0.0575	2.61276e-06	-0.0052	0.0396	0.891251	168.877
OCD	Parathyroid hormone	rs56025909	T	C	0.0358	0.411898	0.0918	7.22659e-06	0.088	0.0691	0.204174	115.233
OCD	Parathyroid hormone	rs639560	T	C	0.0447	-0.4158	0.0879	2.24101e-06	0.0103	0.057	0.851138	145.716
OCD	Parathyroid hormone	rs72781967	T	C	0.7028	-0.1666	0.0353	2.36365e-06	0.0272	0.0262	0.301995	114.058
OCD	Parathyroid hormone	rs72783425	A	C	0.0577	0.339703	0.0733	3.57946e-06	0.0053	0.0506	0.912011	123.56
OCD	Parathyroid hormone	rs75740353	A	G	0.1093	-0.4326	0.0978	9.7199e-06	-0.0148	0.0401	0.707946	367.684
OCD	Parathyroid hormone	rs77885126	T	C	0.9881	-0.602501	0.1312	4.38535e-06	-0.361	0.1332	0.00676083	83.7175
OCD	Parathyroid hormone	rs9544927	A	G	0.7763	0.193204	0.0426	5.75216e-06	-0.0606	0.0314	0.0537032	127.71
OCD	Parathyroid hormone	rs9952159	T	C	0.2396	0.182297	0.0396	4.15552e-06	0.0084	0.0304	0.776247	119.181
Serum 25-Hydroxyvitamin D levels	ASD	rs4977838	G	T	0.434167	-0.008781	0.00196	8e-06	0.0416036	0.014	0.00290302	16.8113
Serum 25-Hydroxyvitamin D levels	ASD	rs6687910	C	T	0.077606	0.01752	0.003697	2e-06	0.0772051	0.0262	0.00319801	19.5007
Serum 25-Hydroxyvitamin D levels	ASD	rs1247708	C	T	0.800843	-0.012351	0.002462	1e-06	0.0488017	0.0179	0.00629303	21.5933
Serum 25-Hydroxyvitamin D levels	ASD	rs4865160	A	G	0.321465	-0.010184	0.002072	1e-06	0.0368043	0.0147	0.0125	20.0777
Serum 25-Hydroxyvitamin D levels	ASD	rs9537006	C	A	0.730394	-0.010597	0.002197	1e-06	0.0383979	0.0157	0.0146899	19.6256
Serum 25-Hydroxyvitamin D levels	ASD	rs1127314	A	G	0.697872	-0.009816	0.002121	4e-06	0.0356953	0.0153	0.0192101	18.0304
Serum 25-Hydroxyvitamin D levels	ASD	rs9817526	A	G	0.698319	0.010267	0.002131	1e-06	-0.0331949	0.015	0.0273602	19.7087
Serum 25-Hydroxyvitamin D levels	ASD	rs17526367	T	C	0.259302	0.011666	0.002365	1e-06	-0.0352024	0.0161	0.0286702	23.1987
Serum 25-Hydroxyvitamin D levels	ASD	rs7716287	G	A	0.421633	0.009565	0.001966	1e-06	-0.0295976	0.014	0.03478	19.8006
Serum 25-Hydroxyvitamin D levels	ASD	rs8043085	T	G	0.233387	-0.011461	0.002302	1e-06	0.0329995	0.0164	0.0447497	20.8578
Serum 25-Hydroxyvitamin D levels	ASD	rs11592540	A	G	0.209376	0.011777	0.002397	1e-06	0.0346043	0.0176	0.0491904	20.3768
Serum 25-Hydroxyvitamin D levels	ASD	rs11631408	G	A	0.540898	0.009219	0.001955	2e-06	-0.0273038	0.0139	0.0506104	18.731
Serum 25-Hydroxyvitamin D levels	ASD	rs12295437	C	T	0.043624	-0.022937	0.004733	1e-06	-0.0633972	0.0331	0.0555495	19.4804
Serum 25-Hydroxyvitamin D levels	ASD	rs3761306	T	C	0.067142	0.017475	0.003896	7e-06	-0.051904	0.0292	0.0753408	16.9751
Serum 25-Hydroxyvitamin D levels	ASD	rs13130892	T	C	0.061851	-0.018906	0.004032	3e-06	0.0531995	0.03	0.0759504	18.4072
Serum 25-Hydroxyvitamin D levels	ASD	rs1868590	A	C	0.876575	-0.01463	0.003025	1e-06	0.0358014	0.0212	0.09192	20.5519
Serum 25-Hydroxyvitamin D levels	ASD	rs76847001	T	C	0.318235	0.01004	0.002085	1e-06	-0.0235962	0.0148	0.1107	19.4097
Serum 25-Hydroxyvitamin D levels	ASD	rs1843096	A	G	0.224461	0.012206	0.002432	1e-06	-0.0256974	0.0166	0.1223	23.0178
Serum 25-Hydroxyvitamin D levels	ASD	rs283811	G	A	0.215964	-0.011772	0.002402	1e-06	-0.0251998	0.0165	0.1272	20.8252
Serum 25-Hydroxyvitamin D levels	ASD	rs8045120	T	G	0.391415	0.009872	0.002026	1e-06	0.0215951	0.0144	0.1354	20.6034
Serum 25-Hydroxyvitamin D levels	ASD	rs888770	G	T	0.715349	-0.010671	0.002189	1e-06	-0.0227981	0.0155	0.1408	20.5784
Serum 25-Hydroxyvitamin D levels	ASD	rs200640263	A	G	0.115471	-0.015461	0.003176	1e-06	0.0308977	0.021	0.141	21.6687
Serum 25-Hydroxyvitamin D levels	ASD	rs6921141	G	A	0.656839	0.010178	0.002064	1e-06	-0.0213015	0.0146	0.145	20.723
Serum 25-Hydroxyvitamin D levels	ASD	rs9523671	A	C	0.367125	-0.009105	0.002019	7e-06	0.0208021	0.0143	0.1469	17.0946
Serum 25-Hydroxyvitamin D levels	ASD	rs651007	T	C	0.206693	-0.011425	0.00241	2e-06	-0.023197	0.0168	0.1687	18.9954
Serum 25-Hydroxyvitamin D levels	ASD	rs145347194	C	T	0.093156	-0.017004	0.003496	1e-06	0.0391047	0.0287	0.1723	21.6779
Serum 25-Hydroxyvitamin D levels	ASD	rs11172190	T	C	0.501067	-0.008679	0.001947	8e-06	0.018704	0.0138	0.176	16.7126
Serum 25-Hydroxyvitamin D levels	ASD	rs2472469	C	T	0.517699	-0.00895	0.001951	5e-06	0.0187038	0.014	0.1828	17.7505
Serum 25-Hydroxyvitamin D levels	ASD	rs9616936	G	A	0.343459	-0.010303	0.002065	1e-06	-0.0189003	0.0146	0.1959	21.244
Serum 25-Hydroxyvitamin D levels	ASD	rs8090363	G	A	0.601303	-0.009867	0.001997	1e-06	-0.0176041	0.014	0.21	20.7147
Serum 25-Hydroxyvitamin D levels	ASD	rs58725556	G	A	0.089354	0.016528	0.003425	1e-06	-0.0291995	0.0233	0.2112	19.7276
Serum 25-Hydroxyvitamin D levels	ASD	rs2516381	G	A	0.553593	0.008959	0.00198	6e-06	0.0176956	0.0142	0.2119	17.6039
Serum 25-Hydroxyvitamin D levels	ASD	rs4078354	G	A	0.657207	-0.010205	0.002061	1e-06	0.0181029	0.015	0.2263	20.8224
Serum 25-Hydroxyvitamin D levels	ASD	rs12970193	A	C	0.195691	0.012254	0.002455	1e-06	0.0205964	0.0172	0.2293	20.9759
Serum 25-Hydroxyvitamin D levels	ASD	rs117330845	G	T	0.010308	0.044109	0.009932	9e-06	-0.0909005	0.0766	0.2355	17.6156
Serum 25-Hydroxyvitamin D levels	ASD	rs2344465	A	G	0.848034	-0.013994	0.002946	2e-06	0.0246048	0.0209	0.2399	22.3984
Serum 25-Hydroxyvitamin D levels	ASD	rs2908806	A	C	0.828907	0.012927	0.002751	3e-06	0.0219963	0.0197	0.2636	21.0332
Serum 25-Hydroxyvitamin D levels	ASD	rs28560482	T	C	0.272745	-0.010579	0.002333	6e-06	-0.0181029	0.0164	0.2677	19.7017
Serum 25-Hydroxyvitamin D levels	ASD	rs55728843	T	C	0.105748	-0.015346	0.003181	1e-06	-0.0266007	0.0241	0.2698	19.7648
Serum 25-Hydroxyvitamin D levels	ASD	rs2173201	A	C	0.226336	-0.011579	0.002317	1e-06	-0.0182047	0.0165	0.2701	20.8362
Serum 25-Hydroxyvitamin D levels	ASD	rs271831	G	A	0.590958	-0.009819	0.001985	1e-06	0.0152964	0.014	0.2733	20.6838
Serum 25-Hydroxyvitamin D levels	ASD	rs73575079	G	A	0.315686	-0.010176	0.002097	1e-06	0.0156011	0.0146	0.2847	19.8534
Serum 25-Hydroxyvitamin D levels	ASD	rs114673443	T	G	0.019169	0.037046	0.007658	1e-06	0.0497992	0.0469	0.2883	22.9007
Serum 25-Hydroxyvitamin D levels	ASD	rs34699226	G	A	0.227144	-0.011595	0.002337	1e-06	-0.0172995	0.0167	0.2999	20.9466
Serum 25-Hydroxyvitamin D levels	ASD	rs1879878	G	A	0.583818	0.00952	0.001977	1e-06	-0.0145043	0.0141	0.3039	19.5436
Serum 25-Hydroxyvitamin D levels	ASD	rs10896045	G	A	0.701095	0.010475	0.002121	1e-06	-0.0152038	0.0151	0.3129	20.4075
Serum 25-Hydroxyvitamin D levels	ASD	rs16823270	G	A	0.116573	0.014982	0.003032	1e-06	0.0227979	0.0227	0.3135	20.5154
Serum 25-Hydroxyvitamin D levels	ASD	rs181391993	T	C	0.076402	0.01806	0.003747	1e-06	0.0308007	0.0307	0.3159	20.4265
Serum 25-Hydroxyvitamin D levels	ASD	rs12100917	G	A	0.126882	-0.01398	0.002927	2e-06	0.0211011	0.0211	0.3185	19.2157
Serum 25-Hydroxyvitamin D levels	ASD	rs73030358	G	A	0.173716	-0.013085	0.002635	1e-06	-0.0183997	0.0186	0.322	21.8117
Serum 25-Hydroxyvitamin D levels	ASD	rs2465174	C	T	0.653652	0.009414	0.002071	6e-06	0.0140989	0.0144	0.3273	17.8064
Serum 25-Hydroxyvitamin D levels	ASD	rs6068773	T	C	0.506362	-0.009773	0.001948	1e-06	-0.0133994	0.0138	0.3325	21.1883
Serum 25-Hydroxyvitamin D levels	ASD	rs2946405	G	A	0.720279	-0.01063	0.002188	1e-06	0.0153979	0.0161	0.336	20.2052
Serum 25-Hydroxyvitamin D levels	ASD	rs2741044	A	G	0.293704	0.010452	0.00213	1e-06	-0.014596	0.0152	0.3377	20.1125
Serum 25-Hydroxyvitamin D levels	ASD	rs4711968	C	T	0.296889	0.010254	0.002123	1e-06	-0.0142973	0.0152	0.3463	19.4793
Serum 25-Hydroxyvitamin D levels	ASD	rs2737245	T	G	0.282493	0.010811	0.002164	1e-06	0.0141987	0.0152	0.3494	21.025
Serum 25-Hydroxyvitamin D levels	ASD	rs34040779	C	T	0.0757	-0.017714	0.003774	3e-06	-0.0243999	0.0265	0.3569	19.4855
Serum 25-Hydroxyvitamin D levels	ASD	rs289714	A	G	0.821558	-0.012134	0.002606	3e-06	-0.0175023	0.019	0.3581	19.1564
Serum 25-Hydroxyvitamin D levels	ASD	rs35634730	T	C	0.135136	0.013975	0.002862	1e-06	0.0189003	0.0206	0.359	20.2578
Serum 25-Hydroxyvitamin D levels	ASD	rs62471929	G	A	0.054335	0.021357	0.00438	1e-06	0.0316042	0.0356	0.375	20.8003
Serum 25-Hydroxyvitamin D levels	ASD	rs8048397	T	C	0.206575	0.011688	0.002395	1e-06	-0.015205	0.0172	0.3789	19.8717
Serum 25-Hydroxyvitamin D levels	ASD	rs78001260	T	C	0.015033	0.039408	0.00812	1e-06	-0.0594953	0.0694	0.3911	20.4083
Serum 25-Hydroxyvitamin D levels	ASD	rs12939053	A	C	0.71059	0.010519	0.002167	1e-06	-0.0133994	0.0158	0.3979	20.1954
Serum 25-Hydroxyvitamin D levels	ASD	rs500328	C	T	0.373475	0.009339	0.002005	3e-06	0.0121029	0.0144	0.4005	18.1121
Serum 25-Hydroxyvitamin D levels	ASD	rs4686529	G	A	0.44684	-0.009163	0.001987	4e-06	0.0122042	0.0146	0.4043	18.4182
Serum 25-Hydroxyvitamin D levels	ASD	rs35664429	A	G	0.047637	-0.020968	0.004573	5e-06	0.0289955	0.0359	0.4192	17.7023
Serum 25-Hydroxyvitamin D levels	ASD	rs3859428	C	T	0.630979	0.010127	0.002057	1e-06	0.0124978	0.0156	0.4231	21.1933
Serum 25-Hydroxyvitamin D levels	ASD	rs1320782	T	C	0.454516	0.009942	0.001983	1e-06	-0.0110003	0.0139	0.4275	21.7496
Serum 25-Hydroxyvitamin D levels	ASD	rs62308866	G	A	0.324832	0.010071	0.002071	1e-06	-0.0111971	0.0148	0.4485	19.7418
Serum 25-Hydroxyvitamin D levels	ASD	rs9940346	C	T	0.500703	-0.009812	0.00199	1e-06	0.010505	0.0139	0.4507	21.3612
Serum 25-Hydroxyvitamin D levels	ASD	rs72798800	G	A	0.049075	-0.021936	0.004527	1e-06	0.0256974	0.0343	0.4536	19.9293
Serum 25-Hydroxyvitamin D levels	ASD	rs9514994	C	A	0.187836	-0.011648	0.002499	3e-06	0.0130042	0.0179	0.4689	18.3694
Serum 25-Hydroxyvitamin D levels	ASD	rs60566117	A	G	0.229879	-0.011521	0.00232	1e-06	0.0118001	0.0166	0.4779	20.855
Serum 25-Hydroxyvitamin D levels	ASD	rs827419	C	A	0.379396	-0.009418	0.002014	3e-06	-0.0101978	0.0144	0.4814	18.535
Serum 25-Hydroxyvitamin D levels	ASD	rs62493995	G	T	0.288161	-0.010929	0.002225	1e-06	0.0108992	0.016	0.4969	21.7445
Serum 25-Hydroxyvitamin D levels	ASD	rs2157829	G	A	0.664366	-0.010282	0.002063	1e-06	0.0101008	0.0149	0.497299	20.9218
Serum 25-Hydroxyvitamin D levels	ASD	rs10859966	T	C	0.77055	-0.011512	0.002324	1e-06	-0.0112025	0.0164	0.4974	20.7951
Serum 25-Hydroxyvitamin D levels	ASD	rs2446066	T	G	0.175559	-0.012598	0.002551	1e-06	0.0119977	0.018	0.5046	20.3872
Serum 25-Hydroxyvitamin D levels	ASD	rs11625746	C	T	0.343409	-0.009389	0.002045	4e-06	-0.00960374	0.0145	0.5083	17.6406
Serum 25-Hydroxyvitamin D levels	ASD	rs336033	G	A	0.611822	0.009605	0.001993	1e-06	-0.00939572	0.0142	0.5087	19.4456
Serum 25-Hydroxyvitamin D levels	ASD	rs144834697	T	G	0.140658	0.013947	0.002898	2e-06	-0.0144032	0.0222	0.5153	20.8672
Serum 25-Hydroxyvitamin D levels	ASD	rs12078655	G	A	0.223517	0.011663	0.002378	1e-06	-0.0108015	0.0166	0.5165	20.9524
Serum 25-Hydroxyvitamin D levels	ASD	rs12027616	T	C	0.450396	0.009423	0.001956	1e-06	0.00870203	0.0138	0.5284	19.5071
Serum 25-Hydroxyvitamin D levels	ASD	rs523518	G	A	0.60416	-0.009757	0.001984	1e-06	0.00879859	0.0141	0.5309	20.2057
Serum 25-Hydroxyvitamin D levels	ASD	rs10146891	T	C	0.357426	0.010189	0.002071	1e-06	-0.00879859	0.0143	0.5384	21.1614
Serum 25-Hydroxyvitamin D levels	ASD	rs6115188	T	G	0.479066	-0.008686	0.001959	9e-06	0.00840458	0.0137	0.5392	16.7103
Serum 25-Hydroxyvitamin D levels	ASD	rs12787658	A	G	0.514947	-0.009453	0.00194	1e-06	-0.00839514	0.014	0.5482	19.8089
Serum 25-Hydroxyvitamin D levels	ASD	rs13409011	A	G	0.30479	0.010621	0.002112	1e-06	-0.00910129	0.0152	0.5495	21.2138
Serum 25-Hydroxyvitamin D levels	ASD	rs1871462	T	G	0.638037	-0.009725	0.002022	2e-06	-0.00830439	0.0142	0.559099	19.3847
Serum 25-Hydroxyvitamin D levels	ASD	rs13020391	T	C	0.375845	-0.009752	0.002023	1e-06	-0.00839514	0.0145	0.5613	19.7997
Serum 25-Hydroxyvitamin D levels	ASD	rs13011875	T	C	0.392631	0.010093	0.002021	1e-06	-0.00820356	0.0141	0.562501	21.56
Serum 25-Hydroxyvitamin D levels	ASD	rs193261074	T	G	0.053395	0.020329	0.004326	3e-06	0.0173978	0.0306	0.5705	18.5383
Serum 25-Hydroxyvitamin D levels	ASD	rs11713724	C	A	0.18496	-0.011196	0.002508	8e-06	0.00999983	0.018	0.579499	16.7706
Serum 25-Hydroxyvitamin D levels	ASD	rs72681845	T	G	0.050041	-0.0221	0.00457	1e-06	-0.019295	0.0357	0.5892	20.6056
Serum 25-Hydroxyvitamin D levels	ASD	rs12670798	C	T	0.24636	-0.011317	0.002262	1e-06	-0.00860289	0.0162	0.5963	21.1042
Serum 25-Hydroxyvitamin D levels	ASD	rs16886847	C	T	0.259728	-0.011122	0.002243	1e-06	-0.00860289	0.0163	0.599799	21.108
Serum 25-Hydroxyvitamin D levels	ASD	rs12273363	C	T	0.207051	-0.010923	0.002398	5e-06	-0.00919757	0.0176	0.6016	17.385
Serum 25-Hydroxyvitamin D levels	ASD	rs742493	C	T	0.112106	0.015166	0.003077	1e-06	0.0107981	0.0213	0.6134	20.319
Serum 25-Hydroxyvitamin D levels	ASD	rs72787359	C	A	0.074123	0.018298	0.003789	1e-06	-0.0160997	0.0321	0.617101	20.3931
Serum 25-Hydroxyvitamin D levels	ASD	rs11061056	A	G	0.032248	-0.026534	0.005509	1e-06	-0.0199986	0.0404	0.619599	19.5003
Serum 25-Hydroxyvitamin D levels	ASD	rs10413905	C	T	0.328204	-0.010308	0.002079	1e-06	-0.00740253	0.0155	0.6342	20.7922
Serum 25-Hydroxyvitamin D levels	ASD	rs1704151	G	T	0.91092	-0.016513	0.003474	2e-06	0.0121029	0.0254	0.6344	19.6373
Serum 25-Hydroxyvitamin D levels	ASD	rs71615088	C	T	0.184667	-0.012937	0.002626	1e-06	-0.00939572	0.02	0.639599	22.3648
Serum 25-Hydroxyvitamin D levels	ASD	rs141685696	A	C	0.081386	0.017238	0.003577	1e-06	-0.0144032	0.032	0.6522	19.7164
Serum 25-Hydroxyvitamin D levels	ASD	rs584336	A	G	0.244033	0.010316	0.002294	7e-06	-0.00790113	0.0175	0.6524	17.4238
Serum 25-Hydroxyvitamin D levels	ASD	rs8086642	A	G	0.540154	-0.009711	0.001952	1e-06	0.00620074	0.0138	0.654	20.7888
Serum 25-Hydroxyvitamin D levels	ASD	rs10814274	T	C	0.417169	0.009767	0.001969	1e-06	-0.0062998	0.014	0.6552	20.5849
Serum 25-Hydroxyvitamin D levels	ASD	rs143348557	C	T	0.055746	0.020681	0.004254	1e-06	0.0122953	0.0282	0.6633	19.9809
Serum 25-Hydroxyvitamin D levels	ASD	rs4673545	C	A	0.273436	-0.009657	0.002175	9e-06	-0.00659818	0.0153	0.668599	16.443
Serum 25-Hydroxyvitamin D levels	ASD	rs62109667	G	A	0.277014	-0.011125	0.002241	1e-06	0.00729656	0.0178	0.6805	21.999
Serum 25-Hydroxyvitamin D levels	ASD	rs62078461	A	G	0.025849	0.028409	0.006179	4e-06	0.0180953	0.0485	0.708101	18.0364
Serum 25-Hydroxyvitamin D levels	ASD	rs112178027	T	C	0.167865	-0.012129	0.002636	4e-06	-0.00700447	0.0189	0.709	18.2378
Serum 25-Hydroxyvitamin D levels	ASD	rs17035665	T	C	0.206121	0.011763	0.002422	1e-06	-0.00660174	0.0178	0.710799	20.0948
Serum 25-Hydroxyvitamin D levels	ASD	rs12616915	A	C	0.113815	-0.015107	0.003072	1e-06	0.00809713	0.0222	0.7157	20.4292
Serum 25-Hydroxyvitamin D levels	ASD	rs62011267	T	C	0.292935	-0.011039	0.002246	1e-06	0.00529595	0.0153	0.727301	22.4008
Serum 25-Hydroxyvitamin D levels	ASD	rs10161491	C	T	0.529451	-0.009513	0.001956	1e-06	0.00460057	0.0139	0.74	20.0095
Serum 25-Hydroxyvitamin D levels	ASD	rs2935277	C	T	0.448961	0.009742	0.001991	1e-06	-0.00519647	0.0158	0.740901	20.8381
Serum 25-Hydroxyvitamin D levels	ASD	rs12146571	T	C	0.172687	0.011723	0.002614	7e-06	-0.0062998	0.0195	0.7485	17.4251
Serum 25-Hydroxyvitamin D levels	ASD	rs6884800	C	T	0.830049	0.01174	0.002626	8e-06	0.00589736	0.0185	0.7486	17.2556
Serum 25-Hydroxyvitamin D levels	ASD	rs4479415	A	G	0.68601	-0.010448	0.002096	1e-06	0.00469894	0.0148	0.7492	20.8681
Serum 25-Hydroxyvitamin D levels	ASD	rs41302867	A	G	0.122801	0.014003	0.002965	2e-06	-0.00719583	0.0231	0.754401	18.7461
Serum 25-Hydroxyvitamin D levels	ASD	rs11624558	C	T	0.303654	-0.010546	0.002133	1e-06	-0.00469894	0.0153	0.760001	20.8714
Serum 25-Hydroxyvitamin D levels	ASD	rs114814269	G	T	0.454351	0.009867	0.002045	1e-06	-0.00430074	0.0148	0.768799	21.4213
Serum 25-Hydroxyvitamin D levels	ASD	rs2912332	G	A	0.082912	-0.01631	0.003535	4e-06	0.00660174	0.023	0.772601	17.9517
Serum 25-Hydroxyvitamin D levels	ASD	rs4505147	A	C	0.350854	-0.01032	0.002065	1e-06	-0.0041988	0.0147	0.7742	21.5278
Serum 25-Hydroxyvitamin D levels	ASD	rs1168100	C	T	0.299236	-0.010636	0.002129	1e-06	0.00439966	0.0157	0.781101	21.053
Serum 25-Hydroxyvitamin D levels	ASD	rs35708458	A	G	0.521877	0.009474	0.001969	2e-06	-0.00389759	0.0146	0.789	19.8767
Serum 25-Hydroxyvitamin D levels	ASD	rs1324190	C	T	0.626985	-0.009448	0.002016	3e-06	-0.00420116	0.0158	0.7899	18.5282
Serum 25-Hydroxyvitamin D levels	ASD	rs1481024	T	G	0.841665	0.013356	0.002689	1e-06	0.00499749	0.0193	0.7941	21.098
Serum 25-Hydroxyvitamin D levels	ASD	rs12147588	C	T	0.091913	0.016914	0.003385	1e-06	-0.00669752	0.0258	0.7952	21.1918
Serum 25-Hydroxyvitamin D levels	ASD	rs60915609	T	G	0.165972	0.012869	0.002628	1e-06	-0.00480151	0.0184	0.7954	20.3458
Serum 25-Hydroxyvitamin D levels	ASD	rs142889360	T	C	0.176536	0.012114	0.002577	3e-06	-0.00450011	0.0181	0.8049	18.9331
Serum 25-Hydroxyvitamin D levels	ASD	rs4619804	C	A	0.736191	-0.01095	0.002221	1e-06	-0.0036035	0.0158	0.8219	20.6671
Serum 25-Hydroxyvitamin D levels	ASD	rs10118061	A	G	0.19707	0.012277	0.002461	1e-06	0.00370313	0.0189	0.8437	21.1667
Serum 25-Hydroxyvitamin D levels	ASD	rs2971672	C	A	0.371795	-0.00895	0.002009	9e-06	-0.0020978	0.0143	0.8816	16.6042
Serum 25-Hydroxyvitamin D levels	ASD	rs9598096	C	T	0.326349	0.010258	0.002093	1e-06	0.00220242	0.0151	0.8847	20.5312
Serum 25-Hydroxyvitamin D levels	ASD	rs11122449	T	C	0.741331	0.010888	0.002242	1e-06	-0.00230265	0.016	0.8875	20.1755
Serum 25-Hydroxyvitamin D levels	ASD	rs76224925	A	G	0.095875	-0.016126	0.003303	1e-06	-0.00290421	0.0249	0.9062	20.0059
Serum 25-Hydroxyvitamin D levels	ASD	rs34720	A	G	0.607697	0.008839	0.001989	9e-06	-0.00160128	0.0143	0.9128	16.5303
Serum 25-Hydroxyvitamin D levels	ASD	rs17068977	T	C	0.137114	-0.01288	0.002825	5e-06	-0.00220242	0.0201	0.9132	17.4195
Serum 25-Hydroxyvitamin D levels	ASD	rs75811632	A	G	0.072902	-0.0167	0.00374	8e-06	0.00279609	0.0274	0.92	16.7288
Serum 25-Hydroxyvitamin D levels	ASD	rs113828591	T	G	0.028162	-0.026821	0.005941	6e-06	0.0036035	0.0427	0.9326	17.4733
Serum 25-Hydroxyvitamin D levels	ASD	rs7958568	C	T	0.527843	0.008774	0.00195	7e-06	-0.00119928	0.014	0.9333	17.0276
Serum 25-Hydroxyvitamin D levels	ASD	rs1854301	T	G	0.256839	0.01031	0.002219	3e-06	0.00119928	0.0161	0.9407	18.0065
Serum 25-Hydroxyvitamin D levels	ASD	rs6438867	C	T	0.659012	-0.009913	0.002053	1e-06	0.0010005	0.0148	0.9453	19.598
Serum 25-Hydroxyvitamin D levels	ASD	rs13148767	G	A	0.632816	0.009951	0.00202	1e-06	-0.000899595	0.0143	0.9481	20.4205
Serum 25-Hydroxyvitamin D levels	ASD	rs116265747	T	C	0.064996	0.019272	0.003996	1e-06	-0.00130085	0.0297	0.9639	20.032
Serum 25-Hydroxyvitamin D levels	ASD	rs2823021	A	G	0.209748	-0.011178	0.002407	3e-06	-0.000300045	0.0168	0.9851	18.3806
Serum 25-Hydroxyvitamin D levels	ASD	rs4970924	G	A	0.514699	0.009349	0.001939	1e-06	-0.00019998	0.0138	0.9872	19.376
Serum 25-Hydroxyvitamin D levels	ASD	rs2301179	G	A	0.499272	0.009051	0.001945	3e-06	0.00020002	0.0138	0.9873	18.1761
Serum 25-Hydroxyvitamin D levels	ASD	rs62261725	G	A	0.326828	-0.009571	0.002073	4e-06	0.00020002	0.0148	0.9895	17.8866
Serum 25-Hydroxyvitamin D levels	ASD	rs66534728	A	G	0.100583	0.015848	0.003372	3e-06	-0.000300045	0.0261	0.9924	20.1653
Serum 25-Hydroxyvitamin D levels	ASD	rs62513274	G	T	0.763339	0.01189	0.002623	6e-06	-0.0001	0.0201	0.9963	22.6663
Serum 25-Hydroxyvitamin D levels	ADHD	rs10118061	A	G	0.19707	0.012277	0.002461	1e-06	-0.0020978	0.0125	0.8654	21.1667
Serum 25-Hydroxyvitamin D levels	ADHD	rs10161491	C	T	0.529451	-0.009513	0.001956	1e-06	0.0102019	0.0092	0.2681	20.0095
Serum 25-Hydroxyvitamin D levels	ADHD	rs10413905	C	T	0.328204	-0.010308	0.002079	1e-06	0.00329542	0.0106	0.7571	20.7922
Serum 25-Hydroxyvitamin D levels	ADHD	rs10814274	T	C	0.417169	0.009767	0.001969	1e-06	-0.00330453	0.0099	0.736	20.5849
Serum 25-Hydroxyvitamin D levels	ADHD	rs10859966	T	C	0.77055	-0.011512	0.002324	1e-06	-0.00659818	0.0114	0.5618	20.7951
Serum 25-Hydroxyvitamin D levels	ADHD	rs10896045	G	A	0.701095	0.010475	0.002121	1e-06	-0.0223973	0.0102	0.0271	20.4075
Serum 25-Hydroxyvitamin D levels	ADHD	rs11061056	A	G	0.032248	-0.026534	0.005509	1e-06	-0.0176041	0.0258	0.4963	19.5003
Serum 25-Hydroxyvitamin D levels	ADHD	rs11122449	T	C	0.741331	0.010888	0.002242	1e-06	-0.0148985	0.0105	0.1569	20.1755
Serum 25-Hydroxyvitamin D levels	ADHD	rs11172190	T	C	0.501067	-0.008679	0.001947	8e-06	0.000500125	0.0093	0.9564	16.7126
[truncated: 5,221 more rows]

## Sheet: Table S3
Table S3. Power estimation of this Mendelian randomization analysis and sensitivity analysis of the causal association
Exposure	Outcome	nSNP	Fstat	MR-Egger			IVW
				Intercept	SE	pvalue	Cochrane_Q	Cochrane_Q_df	Cochrane_Q_pval
AD	Calcium	62	118.544	0.000520563	0.000769942	0.501571	110.306	61	0.000113807
AD	Serum 25-Hydroxyvitamin D levels	65	77.9101	-0.00037152	0.000665146	0.578446	99.0697	64	0.00324178
AD	fibroblast growth factor 23	68	117.756	0.000364608	0.00246761	0.882984	75.5869	67	0.220851
AD	Parathyroid hormone	67	111.67	0.00124011	0.00544244	0.820471	45.8822	66	0.971911
ADHD	Serum 25-Hydroxyvitamin D levels	118	107.381	-0.000187195	0.00103686	0.857043	173.586	117	0.000534804
ADHD	calcium	112	108.098	-0.000552963	0.0013754	0.688437	163.587	111	0.00086867
ADHD	fibroblast growth factor 23	122	108.249	-0.00422992	0.00472118	0.372075	119.342	121	0.525574
ADHD	Parathyroid hormone	122	108.249	0.00655829	0.010652	0.539267	116.4	121	0.601229
AN	Calcium	28	195.794	0.00287202	0.00181011	0.124679	21.7703	27	0.748957
AN	Serum 25-Hydroxyvitamin D levels	27	194.509	-0.00152914	0.0016436	0.361082	33.6294	26	0.144613
AN	fibroblast growth factor 23	29	197.631	-0.00905881	0.0108361	0.410503	43.7089	28	0.0296845
AN	Parathyroid hormone	29	197.631	0.00265704	0.0174795	0.88031	13.9244	28	0.987717
ASD	Serum 25-Hydroxyvitamin D levels	44	124.871	0.000823722	0.0011351	0.472058	52.9345	43	0.142526
ASD	fibroblast growth factor 23	45	125.516	0.00455288	0.00591579	0.445736	41.164	44	0.593882
ASD	Parathyroid hormone	44	125.275	0.00165107	0.0128736	0.898561	41.8816	43	0.519757
ASD	Calcium	41	125.21	9.51162e-05	0.0014414	0.947724	45.0411	40	0.269142
BD	Calcium	93	157.646	-0.0008684	0.00168696	0.607961	175.009	92	4.1171e-07
BD	Serum 25-Hydroxyvitamin D levels	98	168.064	0.00109809	0.0010355	0.291601	128.53	97	0.0177242
BD	fibroblast growth factor 23	107	171.887	0.00228064	0.00504154	0.651936	101.905	106	0.594438
BD	Parathyroid hormone	105	162.287	0.00703567	0.0120798	0.56155	81.0752	104	0.953226
MDD	Serum 25-Hydroxyvitamin D levels	162	133.121	-0.000358036	0.000908369	0.693993	250.538	161	7.85336e-06
MDD	fibroblast growth factor 23	172	135.743	-0.00121881	0.00389433	0.754687	174.075	171	0.420227
MDD	Parathyroid hormone	171	135.907	0.0026094	0.00913289	0.775447	174.223	170	0.396182
MDD	Calcium	169	135.326	0.00159927	0.00114634	0.164836	255.275	168	1.61501e-05
OCD	Calcium	19	280.494	0.00310238	0.00246018	0.224329	23.0553	18	0.188474
OCD	Serum 25-Hydroxyvitamin D levels	19	280.494	0.0020322	0.00173205	0.256855	12.5357	18	0.818383
OCD	fibroblast growth factor 23	19	280.494	0.0149552	0.0107358	0.181565	21.3913	18	0.260133
OCD	Parathyroid hormone	19	280.494	-0.0152015	0.0281098	0.595668	27.9413	18	0.0629534
SCZ	Serum 25-Hydroxyvitamin D levels	271	255.247	-0.000908571	0.000670329	0.176424	497.746	270	1.02067e-15
SCZ	Fibroblast growth factor 23 levels	284	267.3	0.000785508	0.0027399	0.774559	256.398	283	0.870126
SCZ	Parathyroid hormone	283	266.356	-0.00313146	0.0061667	0.611991	242.11	282	0.958869
SCZ	Calcium	266	246.827	0.00155424	0.000815885	0.0578706	415.534	265	9.27941e-09
TS	Serum 25-Hydroxyvitamin D levels	23	195.713	0.000329613	0.00162675	0.841382	44.9506	22	0.00269238
TS	fibroblast growth factor 23	24	196.595	-0.00510701	0.00726769	0.489612	31.3185	23	0.115167
TS	Parathyroid hormone	24	196.595	0.00148253	0.0135787	0.914049	17.151	23	0.801775
TS	Calcium	24	196.595	0.00102573	0.00212233	0.633654	51.8291	23	0.000527116
Calcium	AD	210	75.7411	-2.30491e-06	0.000370732	0.995045	269.801	209	0.00290604
Calcium	ADHD	186	78.1567	0.00141158	0.00176971	0.426113	276.88	185	1.39068e-05
Calcium	AN	207	76.3847	0.00235005	0.0045486	0.605956	229.793	206	0.122529
Calcium	ASD	205	75.5402	-0.00270987	0.00231484	0.243111	252.589	204	0.0116113
Calcium	BD	211	75.5104	-0.00411417	0.00250593	0.102141	337.229	210	5.78799e-08
Calcium	MDD	211	77.8428	-0.000560962	0.000721921	0.438009	276.971	211	0.00154468
Calcium	OCD	204	76.1028	-0.00577072	0.00504489	0.254029	206.429	203	0.41985
Calcium	SCZ	207	77.1219	-0.0012498	0.00177052	0.481054	388.182	206	2.62892e-13
Calcium	TS	201	75.4925	7.20118e-05	0.00384205	0.985065	194.781	200	0.590886
fibroblast growth factor 23	ADHD	20	42.3747	-0.000596441	0.00909925	0.94846	32.3607	19	0.0284524
fibroblast growth factor 23	ASD	24	41.0005	-0.0123258	0.0101825	0.238937	24.4712	23	0.378116
fibroblast growth factor 23	SCZ	24	45.3617	-0.000586418	0.00877646	0.947331	44.7905	23	0.00421627
fibroblast growth factor 23	MDD	27	43.2256	-0.00330224	0.00280963	0.250936	16.0117	26	0.93592
fibroblast growth factor 23	AD	29	45.5175	-0.000742739	0.00193581	0.704218	48.9871	28	0.0083711
fibroblast growth factor 23	BD	27	45.8721	0.00453131	0.00987279	0.650222	30.4283	26	0.250247
fibroblast growth factor 23	AN	27	44.7456	-0.0188679	0.0188362	0.326096	25.1936	26	0.508037
fibroblast growth factor 23	TS	26	44.4707	-0.0139838	0.0182851	0.451866	22.7123	25	0.594359
fibroblast growth factor 23	OCD	28	47.0977	0.0267653	0.023252	0.260169	21.6083	27	0.757003
Parathyroid hormone	ADHD	14	25.6692	-0.017138	0.0150174	0.276045	23.0915	13	0.0405914
Parathyroid hormone	ASD	15	25.918	0.000797513	0.0165223	0.962236	13.5006	14	0.487541
Parathyroid hormone	MDD	16	25.9357	0.00176386	0.00530503	0.744447	20.5317	15	0.15247
Parathyroid hormone	AD	20	27.7046	-0.000983528	0.00246435	0.694512	22.987	19	0.237914
Parathyroid hormone	BD	18	26.7079	0.0178995	0.0161159	0.283121	25.6996	17	0.0801107
Parathyroid hormone	AN	17	26.2965	0.00840392	0.0312279	0.791507	9.16215	16	0.906586
Parathyroid hormone	TS	17	26.1768	0.0142132	0.029684	0.638975	17.662	16	0.34406
Parathyroid hormone	OCD	16	29.5681	0.0600508	0.0356358	0.114115	15.3787	15	0.424499
Parathyroid hormone	SCZ	15	26.3909	-0.0106647	0.011955	0.38857	24.7792	14	0.0368111
Serum 25-Hydroxyvitamin D levels	ASD	153	19.9405	-0.0103052	0.00606064	0.0911227	160.269	152	0.307133
Serum 25-Hydroxyvitamin D levels	SCZ	136	19.8809	-0.00316314	0.00516513	0.54131	270.85	135	3.82903e-11
Serum 25-Hydroxyvitamin D levels	ADHD	132	19.7586	0.0023159	0.00533735	0.665077	189.773	131	0.000604515
Serum 25-Hydroxyvitamin D levels	MDD	144	19.7917	0.00102943	0.00210999	0.626384	228.556	143	7.16652e-06
Serum 25-Hydroxyvitamin D levels	AD	159	19.9563	0.000761024	0.00102569	0.459218	202.599	158	0.00958712
Serum 25-Hydroxyvitamin D levels	BD	154	19.9111	0.00331993	0.00632715	0.600549	209.852	153	0.00156762
Serum 25-Hydroxyvitamin D levels	AN	157	19.9627	0.00932195	0.0131985	0.481069	182.295	156	0.0735777
Serum 25-Hydroxyvitamin D levels	TS	150	19.879	0.0237144	0.011882	0.0477875	159.14	149	0.26994
Serum 25-Hydroxyvitamin D levels	OCD	151	18.5567	0.0284062	0.0158946	0.0759442	174.448	150	0.0838847
ASD, autism spectrum disorder; ADHD, attention-deficit/hyperactivity disorder; SCZ, schizophrenia; BD, bipolar disorder; MDD, major depressive disorder; AD, Alzheimer’s disease; AN, anorexia nervosa; OCD, obsessive-compulsive disorder; TS, Tourette syndrome; MR, Mendelian randomization; SE, standard error; SNP, Single nucleotide polymorphism; IVW, inverse-variance weighted.

## Sheet: Table S4
Table S4. Association of genetically-predicted calcium homeostasis with psychiatric disorders in univaribale mendelian randomization.
Exposure	Outcome	Method	nSNP	BETA	SE	pvalue	OR (95% CI)	BETA (95% CI)
ASD	Serum 25-Hydroxyvitamin D levels	MR Egger	44	-0.0201692	0.0119013	0.0975351	0.9800 (0.9574 to 1.0032)	-0.0202 (-0.0435 to 0.0032)
ASD	Serum 25-Hydroxyvitamin D levels	Weighted median	44	-0.012301	0.00638314	0.0539672	0.9878 (0.9755 to 1.0002)	-0.0123 (-0.0248 to 0.0002)
ASD	Serum 25-Hydroxyvitamin D levels	Inverse variance weighted	44	-0.012289	0.00484354	0.0111748	0.9878 (0.9785 to 0.9972)	-0.0123 (-0.0218 to -0.0028)
ASD	Serum 25-Hydroxyvitamin D levels	Simple mode	44	-0.0100552	0.0135243	0.461229	0.9900 (0.9641 to 1.0166)	-0.0101 (-0.0366 to 0.0165)
ASD	Serum 25-Hydroxyvitamin D levels	Weighted mode	44	-0.0109403	0.0131242	0.409114	0.9891 (0.9640 to 1.0149)	-0.0109 (-0.0367 to 0.0148)
AD	Calcium	MR Egger	62	-0.0234825	0.0266785	0.382261	0.9768 (0.9270 to 1.0292)	-0.0235 (-0.0758 to 0.0288)
AD	Calcium	Weighted median	62	-0.033128	0.0210544	0.115616	0.9674 (0.9283 to 1.0082)	-0.0331 (-0.0744 to 0.0081)
AD	Calcium	Inverse variance weighted	62	-0.0106117	0.0186075	0.56848	0.9894 (0.9540 to 1.0262)	-0.0106 (-0.0471 to 0.0259)
AD	Calcium	Simple mode	62	-0.017386	0.0561797	0.758018	0.9828 (0.8803 to 1.0972)	-0.0174 (-0.1275 to 0.0927)
AD	Calcium	Weighted mode	62	-0.0328364	0.021004	0.123147	0.9677 (0.9287 to 1.0084)	-0.0328 (-0.0740 to 0.0083)
ASD	fibroblast growth factor 23	MR Egger	45	0.0119506	0.0629171	0.850248	1.0120 (0.8946 to 1.1448)	0.0120 (-0.1114 to 0.1353)
ASD	fibroblast growth factor 23	Weighted median	45	0.0477817	0.0377427	0.205518	1.0489 (0.9741 to 1.1295)	0.0478 (-0.0262 to 0.1218)
ASD	fibroblast growth factor 23	Inverse variance weighted	45	0.0563834	0.0250073	0.0241536	1.0580 (1.0074 to 1.1112)	0.0564 (0.0074 to 0.1054)
ASD	fibroblast growth factor 23	Simple mode	45	0.00746434	0.0845971	0.930091	1.0075 (0.8536 to 1.1892)	0.0075 (-0.1583 to 0.1733)
ASD	fibroblast growth factor 23	Weighted mode	45	0.0500389	0.076637	0.517196	1.0513 (0.9047 to 1.2217)	0.0500 (-0.1002 to 0.2002)
ASD	Parathyroid hormone	MR Egger	44	-0.0727614	0.135213	0.593333	0.9298 (0.7134 to 1.2120)	-0.0728 (-0.3378 to 0.1923)
ASD	Parathyroid hormone	Weighted median	44	-0.0454378	0.0771305	0.555792	0.9556 (0.8215 to 1.1115)	-0.0454 (-0.1966 to 0.1057)
ASD	Parathyroid hormone	Inverse variance weighted	44	-0.0569072	0.0547872	0.298946	0.9447 (0.8485 to 1.0518)	-0.0569 (-0.1643 to 0.0505)
ASD	Parathyroid hormone	Simple mode	44	-0.0454094	0.173399	0.794665	0.9556 (0.6803 to 1.3424)	-0.0454 (-0.3853 to 0.2945)
ASD	Parathyroid hormone	Weighted mode	44	-0.0363518	0.178529	0.839612	0.9643 (0.6796 to 1.3683)	-0.0364 (-0.3863 to 0.3136)
SCZ	Serum 25-Hydroxyvitamin D levels	MR Egger	271	-0.00170623	0.0113096	0.880195	0.9983 (0.9764 to 1.0207)	-0.0017 (-0.0239 to 0.0205)
SCZ	Serum 25-Hydroxyvitamin D levels	Weighted median	271	-0.0177891	0.00410259	1.45e-05	0.9824 (0.9745 to 0.9903)	-0.0178 (-0.0258 to -0.0097)
SCZ	Serum 25-Hydroxyvitamin D levels	Inverse variance weighted	271	-0.0164195	0.00317842	2.39e-07	0.9837 (0.9776 to 0.9899)	-0.0164 (-0.0226 to -0.0102)
SCZ	Serum 25-Hydroxyvitamin D levels	Simple mode	271	-0.0341993	0.0153369	0.0265783	0.9664 (0.9378 to 0.9959)	-0.0342 (-0.0643 to -0.0041)
SCZ	Serum 25-Hydroxyvitamin D levels	Weighted mode	271	-0.0327037	0.0136152	0.0169812	0.9678 (0.9423 to 0.9940)	-0.0327 (-0.0594 to -0.0060)
SCZ	Serum 25-Hydroxyvitamin D levels	MR-PRESSO	271	-0.0155128	0.00316947	1.67e-06	0.9846 (0.9785 to 0.9907)	-0.0155 (-0.0093 to -0.0217)
AN	Calcium	MR Egger	28	-0.0157241	0.00906603	0.0946901	0.9844 (0.9671 to 1.0020)	-0.0157 (-0.0335 to 0.0020)
AN	Calcium	Weighted median	28	-0.00279495	0.00495027	0.572341	0.9972 (0.9876 to 1.0069)	-0.0028 (-0.0125 to 0.0069)
AN	Calcium	Inverse variance weighted	28	-0.0024031	0.00342138	0.482445	0.9976 (0.9909 to 1.0043)	-0.0024 (-0.0091 to 0.0043)
AN	Calcium	Simple mode	28	-0.0128165	0.009724	0.198569	0.9873 (0.9686 to 1.0063)	-0.0128 (-0.0319 to 0.0062)
AN	Calcium	Weighted mode	28	-0.0132695	0.00952925	0.175132	0.9868 (0.9686 to 1.0054)	-0.0133 (-0.0319 to 0.0054)
SCZ	fibroblast growth factor 23	MR Egger	284	-0.0260066	0.0461754	0.573736	0.9743 (0.8900 to 1.0666)	-0.0260 (-0.1165 to 0.0645)
SCZ	fibroblast growth factor 23	Weighted median	284	-0.0244426	0.0191151	0.201001	0.9759 (0.9400 to 1.0131)	-0.0244 (-0.0619 to 0.0130)
SCZ	fibroblast growth factor 23	Inverse variance weighted	284	-0.0132716	0.0126084	0.292526	0.9868 (0.9627 to 1.0115)	-0.0133 (-0.0380 to 0.0114)
SCZ	fibroblast growth factor 23	Simple mode	284	-0.0793682	0.0623739	0.204254	0.9237 (0.8174 to 1.0438)	-0.0794 (-0.2016 to 0.0429)
SCZ	fibroblast growth factor 23	Weighted mode	284	-0.0827618	0.0569828	0.147498	0.9206 (0.8233 to 1.0293)	-0.0828 (-0.1944 to 0.0289)
SCZ	Parathyroid hormone	MR Egger	283	0.0994213	0.103747	0.338731	1.1045 (0.9013 to 1.3536)	0.0994 (-0.1039 to 0.3028)
SCZ	Parathyroid hormone	Weighted median	283	0.0741078	0.043998	0.092115	1.0769 (0.9879 to 1.1739)	0.0741 (-0.0121 to 0.1603)
SCZ	Parathyroid hormone	Inverse variance weighted	283	0.048842	0.0290232	0.0924023	1.0501 (0.9920 to 1.1115)	0.0488 (-0.0080 to 0.1057)
SCZ	Parathyroid hormone	Simple mode	283	0.100649	0.156949	0.521859	1.1059 (0.8130 to 1.5042)	0.1006 (-0.2070 to 0.4083)
SCZ	Parathyroid hormone	Weighted mode	283	0.131717	0.119931	0.27302	1.1408 (0.9018 to 1.4431)	0.1317 (-0.1033 to 0.3668)
ADHD	Serum 25-Hydroxyvitamin D levels	MR Egger	118	-0.00181284	0.0180928	0.920361	0.9982 (0.9634 to 1.0342)	-0.0018 (-0.0373 to 0.0336)
ADHD	Serum 25-Hydroxyvitamin D levels	Weighted median	118	-0.00100469	0.00564104	0.858641	0.9990 (0.9880 to 1.0101)	-0.0010 (-0.0121 to 0.0101)
ADHD	Serum 25-Hydroxyvitamin D levels	Inverse variance weighted	118	-0.00497651	0.00448487	0.267162	0.9950 (0.9863 to 1.0038)	-0.0050 (-0.0138 to 0.0038)
ADHD	Serum 25-Hydroxyvitamin D levels	Simple mode	118	-0.0351237	0.0188191	0.0644911	0.9655 (0.9305 to 1.0018)	-0.0351 (-0.0720 to 0.0018)
ADHD	Serum 25-Hydroxyvitamin D levels	Weighted mode	118	0.0180134	0.0191418	0.34862	1.0182 (0.9807 to 1.0571)	0.0180 (-0.0195 to 0.0555)
ADHD	calcium	MR Egger	112	0.0214175	0.0241594	0.377278	1.0216 (0.9744 to 1.0712)	0.0214 (-0.0259 to 0.0688)
ADHD	calcium	Weighted median	112	0.0135443	0.00753096	0.0720998	1.0136 (0.9988 to 1.0287)	0.0135 (-0.0012 to 0.0283)
ADHD	calcium	Inverse variance weighted	112	0.0119921	0.00581309	0.0391183	1.0121 (1.0006 to 1.0237)	0.0120 (0.0006 to 0.0234)
ADHD	calcium	Simple mode	112	0.0145476	0.0232054	0.532008	1.0147 (0.9695 to 1.0619)	0.0145 (-0.0309 to 0.0600)
ADHD	calcium	Weighted mode	112	0.0315167	0.0224448	0.163054	1.0320 (0.9876 to 1.0784)	0.0315 (-0.0125 to 0.0755)
ADHD	fibroblast growth factor 23	MR Egger	122	0.0790329	0.0830603	0.343256	1.0822 (0.9196 to 1.2736)	0.0790 (-0.0838 to 0.2418)
ADHD	fibroblast growth factor 23	Weighted median	122	-0.0202105	0.0293465	0.491021	0.9800 (0.9252 to 1.0380)	-0.0202 (-0.0777 to 0.0373)
ADHD	fibroblast growth factor 23	Inverse variance weighted	122	0.00682492	0.0200894	0.734062	1.0068 (0.9680 to 1.0473)	0.0068 (-0.0326 to 0.0462)
ADHD	fibroblast growth factor 23	Simple mode	122	-0.0546359	0.0856213	0.524607	0.9468 (0.8006 to 1.1198)	-0.0546 (-0.2225 to 0.1132)
ADHD	fibroblast growth factor 23	Weighted mode	122	-0.0451666	0.0859646	0.60026	0.9558 (0.8076 to 1.1313)	-0.0452 (-0.2137 to 0.1233)
ADHD	Parathyroid hormone	MR Egger	122	-0.161521	0.186378	0.387874	0.8508 (0.5905 to 1.2260)	-0.1615 (-0.5268 to 0.2038)
ADHD	Parathyroid hormone	Weighted median	122	-0.053803	0.0677672	0.427231	0.9476 (0.8298 to 1.0822)	-0.0538 (-0.1866 to 0.0790)
ADHD	Parathyroid hormone	Inverse variance weighted	122	-0.0503498	0.0461863	0.275649	0.9509 (0.8686 to 1.0410)	-0.0503 (-0.1409 to 0.0402)
ADHD	Parathyroid hormone	Simple mode	122	0.149204	0.185874	0.423713	1.1609 (0.8065 to 1.6712)	0.1492 (-0.2151 to 0.5135)
ADHD	Parathyroid hormone	Weighted mode	122	0.09026	0.179332	0.615659	1.0945 (0.7701 to 1.5554)	0.0903 (-0.2612 to 0.4417)
MDD	Serum 25-Hydroxyvitamin D levels	MR Egger	162	-0.00194682	0.0339872	0.954393	0.9981 (0.9337 to 1.0668)	-0.0019 (-0.0686 to 0.0647)
MDD	Serum 25-Hydroxyvitamin D levels	Weighted median	162	-0.0144492	0.010697	0.176768	0.9857 (0.9652 to 1.0065)	-0.0144 (-0.0354 to 0.0065)
MDD	Serum 25-Hydroxyvitamin D levels	Inverse variance weighted	162	-0.0149114	0.00853458	0.0806061	0.9852 (0.9689 to 1.0018)	-0.0149 (-0.0316 to 0.0018)
MDD	Serum 25-Hydroxyvitamin D levels	Simple mode	162	-0.0224762	0.0333799	0.501694	0.9778 (0.9159 to 1.0439)	-0.0225 (-0.0879 to 0.0429)
MDD	Serum 25-Hydroxyvitamin D levels	Weighted mode	162	-0.0190531	0.0297081	0.522211	0.9811 (0.9256 to 1.0400)	-0.0191 (-0.0773 to 0.0392)
ASD	Calcium	MR Egger	41	-0.00754878	0.0149981	0.617574	0.9925 (0.9637 to 1.0221)	-0.0075 (-0.0369 to 0.0218)
ASD	Calcium	Weighted median	41	-0.00185046	0.00820435	0.821554	0.9982 (0.9822 to 1.0143)	-0.0019 (-0.0179 to 0.0142)
ASD	Calcium	Inverse variance weighted	41	-0.00664412	0.00600643	0.268654	0.9934 (0.9818 to 1.0051)	-0.0066 (-0.0184 to 0.0051)
ASD	Calcium	Simple mode	41	0.0104135	0.0179537	0.565152	1.0105 (0.9755 to 1.0467)	0.0104 (-0.0248 to 0.0456)
ASD	Calcium	Weighted mode	41	0.00888531	0.0176829	0.618085	1.0089 (0.9746 to 1.0445)	0.0089 (-0.0258 to 0.0435)
MDD	fibroblast growth factor 23	MR Egger	172	0.0530982	0.144593	0.713907	1.0545 (0.7943 to 1.4000)	0.0531 (-0.2303 to 0.3365)
MDD	fibroblast growth factor 23	Weighted median	172	-0.0391612	0.0562136	0.486022	0.9616 (0.8613 to 1.0736)	-0.0392 (-0.1493 to 0.0710)
MDD	fibroblast growth factor 23	Inverse variance weighted	172	0.00935836	0.0369833	0.800235	1.0094 (0.9388 to 1.0853)	0.0094 (-0.0631 to 0.0818)
MDD	fibroblast growth factor 23	Simple mode	172	-0.126177	0.18625	0.499032	0.8815 (0.6119 to 1.2698)	-0.1262 (-0.4912 to 0.2389)
MDD	fibroblast growth factor 23	Weighted mode	172	-0.126177	0.180347	0.485108	0.8815 (0.6190 to 1.2552)	-0.1262 (-0.4797 to 0.2273)
MDD	Parathyroid hormone	MR Egger	171	-0.0459699	0.33914	0.892339	0.9551 (0.4913 to 1.8566)	-0.0460 (-0.7107 to 0.6187)
MDD	Parathyroid hormone	Weighted median	171	0.14676	0.12006	0.221559	1.1581 (0.9153 to 1.4653)	0.1468 (-0.0886 to 0.3821)
MDD	Parathyroid hormone	Inverse variance weighted	171	0.0478388	0.0847111	0.572258	1.0490 (0.8885 to 1.2385)	0.0478 (-0.1182 to 0.2139)
MDD	Parathyroid hormone	Simple mode	171	0.232226	0.369014	0.529988	1.2614 (0.6120 to 2.6000)	0.2322 (-0.4910 to 0.9555)
MDD	Parathyroid hormone	Weighted mode	171	0.268013	0.344793	0.438052	1.3074 (0.6651 to 2.5697)	0.2680 (-0.4078 to 0.9438)
AD	Serum 25-Hydroxyvitamin D levels	MR Egger	65	0.00346103	0.0296373	0.907406	1.0035 (0.9468 to 1.0635)	0.0035 (-0.0546 to 0.0616)
AD	Serum 25-Hydroxyvitamin D levels	Weighted median	65	-0.00324102	0.023498	0.890298	0.9968 (0.9519 to 1.0437)	-0.0032 (-0.0493 to 0.0428)
AD	Serum 25-Hydroxyvitamin D levels	Inverse variance weighted	65	-0.0100914	0.0169275	0.551071	0.9900 (0.9577 to 1.0234)	-0.0101 (-0.0433 to 0.0231)
AD	Serum 25-Hydroxyvitamin D levels	Simple mode	65	-0.0402403	0.0439597	0.363423	0.9606 (0.8813 to 1.0470)	-0.0402 (-0.1264 to 0.0459)
AD	Serum 25-Hydroxyvitamin D levels	Weighted mode	65	-0.0110522	0.0287575	0.702012	0.9890 (0.9348 to 1.0464)	-0.0111 (-0.0674 to 0.0453)
BD	Calcium	MR Egger	93	7.71e-05	0.0209505	0.99707	1.0001 (0.9598 to 1.0420)	0.0001 (-0.0410 to 0.0411)
BD	Calcium	Weighted median	93	-0.0130845	0.00609628	0.0318486	0.9870 (0.9753 to 0.9989)	-0.0131 (-0.0250 to -0.0011)
BD	Calcium	Inverse variance weighted	93	-0.0103684	0.00519225	0.0458364	0.9897 (0.9797 to 0.9998)	-0.0104 (-0.0205 to -0.0002)
BD	Calcium	Simple mode	93	-0.0345703	0.0183519	0.0627585	0.9660 (0.9319 to 1.0014)	-0.0346 (-0.0705 to 0.0014)
BD	Calcium	Weighted mode	93	-0.0319436	0.0160671	0.0497687	0.9686 (0.9385 to 0.9995)	-0.0319 (-0.0634 to -0.0005)
AD	fibroblast growth factor 23	MR Egger	68	0.00228675	0.0854882	0.97874	1.0023 (0.8477 to 1.1851)	0.0023 (-0.1653 to 0.1698)
AD	fibroblast growth factor 23	Weighted median	68	0.041079	0.085035	0.629036	1.0419 (0.8820 to 1.2309)	0.0411 (-0.1256 to 0.2077)
AD	fibroblast growth factor 23	Inverse variance weighted	68	0.0110053	0.0614062	0.857764	1.0111 (0.8964 to 1.1404)	0.0110 (-0.1094 to 0.1314)
AD	fibroblast growth factor 23	Simple mode	68	-0.163942	0.206426	0.429887	0.8488 (0.5664 to 1.2721)	-0.1639 (-0.5685 to 0.2407)
AD	fibroblast growth factor 23	Weighted mode	68	0.0263075	0.0761851	0.730943	1.0267 (0.8843 to 1.1920)	0.0263 (-0.1230 to 0.1756)
AD	Parathyroid hormone	MR Egger	67	0.201595	0.194324	0.303386	1.2234 (0.8359 to 1.7905)	0.2016 (-0.1793 to 0.5825)
AD	Parathyroid hormone	Weighted median	67	0.233634	0.198561	0.239341	1.2632 (0.8559 to 1.8642)	0.2336 (-0.1555 to 0.6228)
AD	Parathyroid hormone	Inverse variance weighted	67	0.233125	0.136434	0.0875057	1.2625 (0.9663 to 1.6496)	0.2331 (-0.0343 to 0.5005)
AD	Parathyroid hormone	Simple mode	67	0.0624757	0.436281	0.886568	1.0645 (0.4527 to 2.5032)	0.0625 (-0.7926 to 0.9176)
AD	Parathyroid hormone	Weighted mode	67	0.21243	0.180461	0.243362	1.2367 (0.8683 to 1.7614)	0.2124 (-0.1413 to 0.5661)
BD	Serum 25-Hydroxyvitamin D levels	MR Egger	98	-0.0207229	0.0126526	0.104729	0.9795 (0.9555 to 1.0041)	-0.0207 (-0.0455 to 0.0041)
BD	Serum 25-Hydroxyvitamin D levels	Weighted median	98	-0.0062662	0.00439059	0.153525	0.9938 (0.9852 to 1.0023)	-0.0063 (-0.0149 to 0.0023)
BD	Serum 25-Hydroxyvitamin D levels	Inverse variance weighted	98	-0.00776739	0.00329336	0.0183491	0.9923 (0.9859 to 0.9987)	-0.0078 (-0.0142 to -0.0013)
BD	Serum 25-Hydroxyvitamin D levels	Simple mode	98	-0.00399566	0.0120072	0.740024	0.9960 (0.9728 to 1.0197)	-0.0040 (-0.0275 to 0.0195)
BD	Serum 25-Hydroxyvitamin D levels	Weighted mode	98	-0.00348213	0.0112926	0.758473	0.9965 (0.9747 to 1.0188)	-0.0035 (-0.0256 to 0.0187)
MDD	Calcium	MR Egger	169	-0.0528018	0.0425897	0.216796	0.9486 (0.8726 to 1.0311)	-0.0528 (-0.1363 to 0.0307)
MDD	Calcium	Weighted median	169	-0.00634166	0.0134045	0.636142	0.9937 (0.9679 to 1.0201)	-0.0063 (-0.0326 to 0.0199)
MDD	Calcium	Inverse variance weighted	169	0.00482503	0.0104052	0.642854	1.0048 (0.9846 to 1.0255)	0.0048 (-0.0156 to 0.0252)
MDD	Calcium	Simple mode	169	-0.0261344	0.0420454	0.535063	0.9742 (0.8971 to 1.0579)	-0.0261 (-0.1085 to 0.0563)
MDD	Calcium	Weighted mode	169	-0.0336488	0.0402317	0.404132	0.9669 (0.8936 to 1.0462)	-0.0336 (-0.1125 to 0.0452)
BD	fibroblast growth factor 23	MR Egger	107	-0.01606	0.0627958	0.798645	0.9841 (0.8701 to 1.1130)	-0.0161 (-0.1391 to 0.1070)
BD	fibroblast growth factor 23	Weighted median	107	0.0167272	0.0216868	0.440524	1.0169 (0.9746 to 1.0610)	0.0167 (-0.0258 to 0.0592)
BD	fibroblast growth factor 23	Inverse variance weighted	107	0.0114632	0.0155411	0.460754	1.0115 (0.9812 to 1.0428)	0.0115 (-0.0190 to 0.0419)
BD	fibroblast growth factor 23	Simple mode	107	0.0350841	0.065606	0.593929	1.0357 (0.9107 to 1.1778)	0.0351 (-0.0935 to 0.1637)
BD	fibroblast growth factor 23	Weighted mode	107	0.0184953	0.0569371	0.745944	1.0187 (0.9111 to 1.1389)	0.0185 (-0.0931 to 0.1301)
BD	Parathyroid hormone	MR Egger	105	-0.095711	0.150046	0.52497	0.9087 (0.6772 to 1.2194)	-0.0957 (-0.3898 to 0.1984)
BD	Parathyroid hormone	Weighted median	105	0.00762607	0.0504685	0.879893	1.0077 (0.9128 to 1.1124)	0.0076 (-0.0913 to 0.1065)
BD	Parathyroid hormone	Inverse variance weighted	105	-0.0107704	0.0352863	0.760192	0.9893 (0.9232 to 1.0601)	-0.0108 (-0.0799 to 0.0584)
BD	Parathyroid hormone	Simple mode	105	-0.0541671	0.158422	0.733104	0.9473 (0.6944 to 1.2922)	-0.0542 (-0.3647 to 0.2563)
BD	Parathyroid hormone	Weighted mode	105	-0.0918724	0.150338	0.542462	0.9122 (0.6794 to 1.2248)	-0.0919 (-0.3865 to 0.2028)
AN	Serum 25-Hydroxyvitamin D levels	MR Egger	27	0.00775155	0.00825208	0.356542	1.0078 (0.9916 to 1.0242)	0.0078 (-0.0084 to 0.0239)
AN	Serum 25-Hydroxyvitamin D levels	Weighted median	27	-0.0036236	0.00408466	0.375013	0.9964 (0.9884 to 1.0044)	-0.0036 (-0.0116 to 0.0044)
AN	Serum 25-Hydroxyvitamin D levels	Inverse variance weighted	27	0.000671796	0.00318382	0.832885	1.0007 (0.9944 to 1.0069)	0.0007 (-0.0056 to 0.0069)
AN	Serum 25-Hydroxyvitamin D levels	Simple mode	27	-0.00611418	0.00806275	0.455076	0.9939 (0.9783 to 1.0097)	-0.0061 (-0.0219 to 0.0097)
AN	Serum 25-Hydroxyvitamin D levels	Weighted mode	27	-0.00513622	0.0077076	0.511036	0.9949 (0.9800 to 1.0100)	-0.0051 (-0.0202 to 0.0100)
OCD	Calcium	MR Egger	19	-0.0065085	0.00950065	0.502541	0.9935 (0.9752 to 1.0122)	-0.0065 (-0.0251 to 0.0121)
OCD	Calcium	Weighted median	19	0.00394256	0.00443047	0.373534	1.0040 (0.9953 to 1.0127)	0.0039 (-0.0047 to 0.0126)
OCD	Calcium	Inverse variance weighted	19	0.0047116	0.00338523	0.163979	1.0047 (0.9981 to 1.0114)	0.0047 (-0.0019 to 0.0113)
OCD	Calcium	Simple mode	19	-0.00285673	0.00784344	0.719938	0.9971 (0.9819 to 1.0126)	-0.0029 (-0.0182 to 0.0125)
OCD	Calcium	Weighted mode	19	0.00237183	0.00543004	0.667452	1.0024 (0.9918 to 1.0131)	0.0024 (-0.0083 to 0.0130)
AN	fibroblast growth factor 23	MR Egger	29	0.0135872	0.0540831	0.80354	1.0137 (0.9117 to 1.1270)	0.0136 (-0.0924 to 0.1196)
AN	fibroblast growth factor 23	Weighted median	29	-0.0247216	0.025011	0.322942	0.9756 (0.9289 to 1.0246)	-0.0247 (-0.0737 to 0.0243)
AN	fibroblast growth factor 23	Inverse variance weighted	29	-0.0281791	0.020598	0.171295	0.9722 (0.9337 to 1.0123)	-0.0282 (-0.0686 to 0.0122)
AN	fibroblast growth factor 23	Simple mode	29	-0.0823941	0.057257	0.16123	0.9209 (0.8231 to 1.0303)	-0.0824 (-0.1946 to 0.0298)
AN	fibroblast growth factor 23	Weighted mode	29	-0.0636536	0.0521819	0.2327	0.9383 (0.8471 to 1.0394)	-0.0637 (-0.1659 to 0.0386)
AN	Parathyroid hormone	MR Egger	29	-0.00571186	0.0887858	0.949179	0.9943 (0.8355 to 1.1833)	-0.0057 (-0.1797 to 0.1683)
AN	Parathyroid hormone	Weighted median	29	0.0225331	0.0448875	0.615674	1.0228 (0.9366 to 1.1169)	0.0225 (-0.0654 to 0.1105)
AN	Parathyroid hormone	Inverse variance weighted	29	0.00677649	0.0336665	0.840477	1.0068 (0.9425 to 1.0755)	0.0068 (-0.0592 to 0.0728)
AN	Parathyroid hormone	Simple mode	29	0.0561195	0.0821004	0.499879	1.0577 (0.9005 to 1.2424)	0.0561 (-0.1048 to 0.2170)
AN	Parathyroid hormone	Weighted mode	29	0.0337931	0.0792993	0.673259	1.0344 (0.8855 to 1.2083)	0.0338 (-0.1216 to 0.1892)
TS	Serum 25-Hydroxyvitamin D levels	MR Egger	23	-0.00647448	0.00869892	0.464952	0.9935 (0.9768 to 1.0106)	-0.0065 (-0.0235 to 0.0106)
TS	Serum 25-Hydroxyvitamin D levels	Weighted median	23	-0.00607211	0.00516751	0.239973	0.9939 (0.9839 to 1.0041)	-0.0061 (-0.0162 to 0.0041)
TS	Serum 25-Hydroxyvitamin D levels	Inverse variance weighted	23	-0.00495891	0.00434319	0.253551	0.9951 (0.9866 to 1.0036)	-0.0050 (-0.0135 to 0.0036)
TS	Serum 25-Hydroxyvitamin D levels	Simple mode	23	-0.014977	0.0125866	0.246763	0.9851 (0.9611 to 1.0097)	-0.0150 (-0.0396 to 0.0097)
TS	Serum 25-Hydroxyvitamin D levels	Weighted mode	23	-0.0171238	0.011527	0.151592	0.9830 (0.9611 to 1.0055)	-0.0171 (-0.0397 to 0.0055)
SCZ	Calcium	MR Egger	266	-0.0326283	0.0139178	0.0198014	0.9679 (0.9419 to 0.9947)	-0.0326 (-0.0599 to -0.0053)
SCZ	Calcium	Weighted median	266	-0.0118338	0.00496139	0.0170707	0.9882 (0.9787 to 0.9979)	-0.0118 (-0.0216 to -0.0021)
SCZ	Calcium	Inverse variance weighted	266	-0.00711363	0.00380191	0.0613359	0.9929 (0.9855 to 1.0003)	-0.0071 (-0.0146 to 0.0003)
SCZ	Calcium	Simple mode	266	-0.0247331	0.017645	0.162173	0.9756 (0.9424 to 1.0099)	-0.0247 (-0.0593 to 0.0099)
SCZ	Calcium	Weighted mode	266	-0.0219795	0.0125689	0.0814962	0.9783 (0.9545 to 1.0027)	-0.0220 (-0.0466 to 0.0027)
TS	fibroblast growth factor 23	MR Egger	24	0.0433762	0.0401315	0.29147	1.0443 (0.9653 to 1.1298)	0.0434 (-0.0353 to 0.1220)
TS	fibroblast growth factor 23	Weighted median	24	0.0328249	0.0263116	0.212197	1.0334 (0.9814 to 1.0881)	0.0328 (-0.0187 to 0.0844)
TS	fibroblast growth factor 23	Inverse variance weighted	24	0.0188819	0.0196672	0.33702	1.0191 (0.9805 to 1.0591)	0.0189 (-0.0197 to 0.0574)
TS	fibroblast growth factor 23	Simple mode	24	0.0449965	0.0462961	0.341198	1.0460 (0.9553 to 1.1454)	0.0450 (-0.0457 to 0.1357)
TS	fibroblast growth factor 23	Weighted mode	24	0.0397977	0.0334928	0.246862	1.0406 (0.9745 to 1.1112)	0.0398 (-0.0258 to 0.1054)
TS	Parathyroid hormone	MR Egger	24	0.000450862	0.0727461	0.995111	1.0005 (0.8675 to 1.1538)	0.0005 (-0.1421 to 0.1430)
TS	Parathyroid hormone	Weighted median	24	-0.00409317	0.0547739	0.940431	0.9959 (0.8945 to 1.1088)	-0.0041 (-0.1115 to 0.1033)
TS	Parathyroid hormone	Inverse variance weighted	24	0.0072576	0.0374866	0.846485	1.0073 (0.9359 to 1.0841)	0.0073 (-0.0662 to 0.0807)
TS	Parathyroid hormone	Simple mode	24	0.0292631	0.0921148	0.753593	1.0297 (0.8596 to 1.2334)	0.0293 (-0.1513 to 0.2098)
TS	Parathyroid hormone	Weighted mode	24	-0.00493112	0.0769691	0.949471	0.9951 (0.8557 to 1.1571)	-0.0049 (-0.1558 to 0.1459)
OCD	Serum 25-Hydroxyvitamin D levels	MR Egger	19	-0.00220365	0.00670531	0.74644	0.9978 (0.9848 to 1.0110)	-0.0022 (-0.0153 to 0.0109)
OCD	Serum 25-Hydroxyvitamin D levels	Weighted median	19	0.00336842	0.00337366	0.318063	1.0034 (0.9968 to 1.0100)	0.0034 (-0.0032 to 0.0100)
OCD	Serum 25-Hydroxyvitamin D levels	Inverse variance weighted	19	0.00516214	0.00235577	0.0284318	1.0052 (1.0005 to 1.0098)	0.0052 (0.0005 to 0.0098)
OCD	Serum 25-Hydroxyvitamin D levels	Simple mode	19	0.00612807	0.00506322	0.241814	1.0061 (0.9962 to 1.0162)	0.0061 (-0.0038 to 0.0161)
OCD	Serum 25-Hydroxyvitamin D levels	Weighted mode	19	0.00499028	0.00467886	0.300268	1.0050 (0.9958 to 1.0143)	0.0050 (-0.0042 to 0.0142)
TS	Calcium	MR Egger	24	-0.00325314	0.0115716	0.781236	0.9968 (0.9744 to 1.0196)	-0.0033 (-0.0259 to 0.0194)
TS	Calcium	Weighted median	24	-0.00105691	0.00636679	0.868154	0.9989 (0.9866 to 1.0115)	-0.0011 (-0.0135 to 0.0114)
TS	Calcium	Inverse variance weighted	24	0.00158556	0.00570487	0.781065	1.0016 (0.9904 to 1.0128)	0.0016 (-0.0096 to 0.0128)
TS	Calcium	Simple mode	24	-0.000530553	0.0103252	0.959463	0.9995 (0.9794 to 1.0199)	-0.0005 (-0.0208 to 0.0197)
TS	Calcium	Weighted mode	24	-0.000173823	0.00760712	0.981967	0.9998 (0.9850 to 1.0148)	-0.0002 (-0.0151 to 0.0147)
OCD	fibroblast growth factor 23	MR Egger	19	-0.0462214	0.0429272	0.29664	0.9548 (0.8778 to 1.0386)	-0.0462 (-0.1304 to 0.0379)
OCD	fibroblast growth factor 23	Weighted median	19	0.0102748	0.0203418	0.613484	1.0103 (0.9708 to 1.0514)	0.0103 (-0.0296 to 0.0501)
OCD	fibroblast growth factor 23	Inverse variance weighted	19	0.00966587	0.0156634	0.537169	1.0097 (0.9792 to 1.0412)	0.0097 (-0.0210 to 0.0404)
OCD	fibroblast growth factor 23	Simple mode	19	0.0155674	0.036299	0.673109	1.0157 (0.9459 to 1.0906)	0.0156 (-0.0556 to 0.0867)
OCD	fibroblast growth factor 23	Weighted mode	19	0.0146079	0.0313065	0.646378	1.0147 (0.9543 to 1.0789)	0.0146 (-0.0468 to 0.0760)
OCD	Parathyroid hormone	MR Egger	19	0.0860477	0.10853	0.438793	1.0899 (0.8810 to 1.3482)	0.0860 (-0.1267 to 0.2988)
OCD	Parathyroid hormone	Weighted median	19	-0.0251499	0.0433591	0.561888	0.9752 (0.8957 to 1.0617)	-0.0251 (-0.1101 to 0.0598)
OCD	Parathyroid hormone	Inverse variance weighted	19	0.0310714	0.0372481	0.404183	1.0316 (0.9589 to 1.1097)	0.0311 (-0.0419 to 0.1041)
OCD	Parathyroid hormone	Simple mode	19	-0.0118063	0.0578961	0.840703	0.9883 (0.8822 to 1.1070)	-0.0118 (-0.1253 to 0.1017)
OCD	Parathyroid hormone	Weighted mode	19	-0.0213915	0.0486368	0.665302	0.9788 (0.8898 to 1.0767)	-0.0214 (-0.1167 to 0.0739)
Serum 25-Hydroxyvitamin D levels	ASD	MR Egger	153	0.598255	0.534077	0.264422	1.8189 (0.6386 to 5.1812)	0.5983 (-0.4485 to 1.6450)
Serum 25-Hydroxyvitamin D levels	ASD	Weighted median	153	-0.371789	0.17612	0.0347722	0.6895 (0.4882 to 0.9738)	-0.3718 (-0.7170 to -0.0266)
Serum 25-Hydroxyvitamin D levels	ASD	Inverse variance weighted	153	-0.285068	0.124727	0.022281	0.7520 (0.5889 to 0.9602)	-0.2851 (-0.5295 to -0.0406)
Serum 25-Hydroxyvitamin D levels	ASD	Simple mode	153	-0.606325	0.567792	0.287275	0.5454 (0.1792 to 1.6596)	-0.6063 (-1.7192 to 0.5065)
Serum 25-Hydroxyvitamin D levels	ASD	Weighted mode	153	-0.606325	0.506402	0.233046	0.5454 (0.2021 to 1.4714)	-0.6063 (-1.5989 to 0.3862)
Serum 25-Hydroxyvitamin D levels	SCZ	MR Egger	136	0.299342	0.450702	0.507724	1.3490 (0.5576 to 3.2632)	0.2993 (-0.5840 to 1.1827)
Serum 25-Hydroxyvitamin D levels	SCZ	Weighted median	136	0.0238335	0.133322	0.858121	1.0241 (0.7886 to 1.3300)	0.0238 (-0.2375 to 0.2851)
Serum 25-Hydroxyvitamin D levels	SCZ	Inverse variance weighted	136	0.0324155	0.114412	0.77693	1.0329 (0.8254 to 1.2926)	0.0324 (-0.1918 to 0.2567)
Serum 25-Hydroxyvitamin D levels	SCZ	Simple mode	136	0.059996	0.424637	0.887853	1.0618 (0.4620 to 2.4407)	0.0600 (-0.7723 to 0.8923)
Serum 25-Hydroxyvitamin D levels	SCZ	Weighted mode	136	0.0947706	0.382854	0.804868	1.0994 (0.5191 to 2.3284)	0.0948 (-0.6556 to 0.8452)
Serum 25-Hydroxyvitamin D levels	ADHD	MR Egger	132	-0.277607	0.473464	0.55867	0.7576 (0.2995 to 1.9163)	-0.2776 (-1.2056 to 0.6504)
Serum 25-Hydroxyvitamin D levels	ADHD	Weighted median	132	0.123094	0.133047	0.354868	1.1310 (0.8714 to 1.4680)	0.1231 (-0.1377 to 0.3839)
Serum 25-Hydroxyvitamin D levels	ADHD	Inverse variance weighted	132	-0.0774408	0.10625	0.466091	0.9255 (0.7515 to 1.1398)	-0.0774 (-0.2857 to 0.1308)
Serum 25-Hydroxyvitamin D levels	ADHD	Simple mode	132	0.415142	0.384981	0.282862	1.5146 (0.7122 to 3.2210)	0.4151 (-0.3394 to 1.1697)
Serum 25-Hydroxyvitamin D levels	ADHD	Weighted mode	132	0.380579	0.362649	0.295906	1.4631 (0.7188 to 2.9784)	0.3806 (-0.3302 to 1.0914)
Serum 25-Hydroxyvitamin D levels	MDD	MR Egger	144	-0.153467	0.182601	0.40207	0.8577 (0.5997 to 1.2268)	-0.1535 (-0.5114 to 0.2044)
Serum 25-Hydroxyvitamin D levels	MDD	Weighted median	144	-0.0369153	0.0600824	0.538944	0.9638 (0.8567 to 1.0842)	-0.0369 (-0.1547 to 0.0808)
Serum 25-Hydroxyvitamin D levels	MDD	Inverse variance weighted	144	-0.0676371	0.0488042	0.165781	0.9346 (0.8493 to 1.0284)	-0.0676 (-0.1633 to 0.0280)
Serum 25-Hydroxyvitamin D levels	MDD	Simple mode	144	0.104467	0.198541	0.599583	1.1101 (0.7523 to 1.6382)	0.1045 (-0.2847 to 0.4936)
Serum 25-Hydroxyvitamin D levels	MDD	Weighted mode	144	0.0659152	0.171366	0.701071	1.0681 (0.7634 to 1.4945)	0.0659 (-0.2700 to 0.4018)
Serum 25-Hydroxyvitamin D levels	AD	MR Egger	159	-0.0630706	0.0892884	0.481005	0.9389 (0.7881 to 1.1184)	-0.0631 (-0.2381 to 0.1119)
Serum 25-Hydroxyvitamin D levels	AD	Weighted median	159	-0.0245166	0.0308281	0.426456	0.9758 (0.9186 to 1.0366)	-0.0245 (-0.0849 to 0.0359)
Serum 25-Hydroxyvitamin D levels	AD	Inverse variance weighted	159	0.000921327	0.0230735	0.968149	1.0009 (0.9567 to 1.0472)	0.0009 (-0.0443 to 0.0461)
Serum 25-Hydroxyvitamin D levels	AD	Simple mode	159	-0.0784502	0.0890244	0.379536	0.9245 (0.7765 to 1.1008)	-0.0785 (-0.2529 to 0.0960)
Serum 25-Hydroxyvitamin D levels	AD	Weighted mode	159	-0.109222	0.0762354	0.153921	0.8965 (0.7721 to 1.0410)	-0.1092 (-0.2586 to 0.0402)
Serum 25-Hydroxyvitamin D levels	BD	MR Egger	154	-0.229191	0.553239	0.67926	0.7952 (0.2689 to 2.3517)	-0.2292 (-1.3135 to 0.8552)
Serum 25-Hydroxyvitamin D levels	BD	Weighted median	154	0.148924	0.17653	0.398884	1.1606 (0.8211 to 1.6404)	0.1489 (-0.1971 to 0.4949)
Serum 25-Hydroxyvitamin D levels	BD	Inverse variance weighted	154	0.0516065	0.139996	0.712404	1.0530 (0.8003 to 1.3854)	0.0516 (-0.2228 to 0.3260)
Serum 25-Hydroxyvitamin D levels	BD	Simple mode	154	0.555661	0.601594	0.357124	1.7431 (0.5361 to 5.6677)	0.5557 (-0.6235 to 1.7348)
Serum 25-Hydroxyvitamin D levels	BD	Weighted mode	154	0.555661	0.540401	0.305461	1.7431 (0.6044 to 5.0271)	0.5557 (-0.5035 to 1.6148)
Serum 25-Hydroxyvitamin D levels	AN	MR Egger	157	-0.748928	1.16108	0.519862	0.4729 (0.0486 to 4.6033)	-0.7489 (-3.0246 to 1.5268)
Serum 25-Hydroxyvitamin D levels	AN	Weighted median	157	-0.101426	0.379606	0.789325	0.9035 (0.4294 to 1.9014)	-0.1014 (-0.8455 to 0.6426)
Serum 25-Hydroxyvitamin D levels	AN	Inverse variance weighted	157	0.0481087	0.272727	0.859981	1.0493 (0.6148 to 1.7908)	0.0481 (-0.4864 to 0.5827)
Serum 25-Hydroxyvitamin D levels	AN	Simple mode	157	0.24022	1.21509	0.843539	1.2715 (0.1175 to 13.7604)	0.2402 (-2.1414 to 2.6218)
Serum 25-Hydroxyvitamin D levels	AN	Weighted mode	157	0.24022	1.19549	0.841008	1.2715 (0.1221 to 13.2417)	0.2402 (-2.1029 to 2.5834)
Serum 25-Hydroxyvitamin D levels	TS	MR Egger	150	-2.13076	1.05178	0.0445763	0.1187 (0.0151 to 0.9331)	-2.1308 (-4.1923 to -0.0693)
Serum 25-Hydroxyvitamin D levels	TS	Weighted median	150	-0.0338943	0.337355	0.919971	0.9667 (0.4990 to 1.8726)	-0.0339 (-0.6951 to 0.6273)
Serum 25-Hydroxyvitamin D levels	TS	Inverse variance weighted	150	-0.0861535	0.240638	0.720328	0.9175 (0.5725 to 1.4703)	-0.0862 (-0.5578 to 0.3855)
Serum 25-Hydroxyvitamin D levels	TS	Simple mode	150	0.718038	1.05907	0.498831	2.0504 (0.2572 to 16.3434)	0.7180 (-1.3577 to 2.7938)
Serum 25-Hydroxyvitamin D levels	TS	Weighted mode	150	0.515027	0.977034	0.598885	1.6737 (0.2466 to 11.3590)	0.5150 (-1.4000 to 2.4300)
Serum 25-Hydroxyvitamin D levels	OCD	MR Egger	151	-2.15041	1.40993	0.129331	0.1164 (0.0073 to 1.8461)	-2.1504 (-4.9139 to 0.6131)
Serum 25-Hydroxyvitamin D levels	OCD	Weighted median	151	-0.0756862	0.455898	0.868145	0.9271 (0.3794 to 2.2657)	-0.0757 (-0.9692 to 0.8179)
Serum 25-Hydroxyvitamin D levels	OCD	Inverse variance weighted	151	0.301941	0.326333	0.354834	1.3525 (0.7134 to 2.5640)	0.3019 (-0.3377 to 0.9416)
Serum 25-Hydroxyvitamin D levels	OCD	Simple mode	151	-0.255436	1.30821	0.845456	0.7746 (0.0596 to 10.0608)	-0.2554 (-2.8195 to 2.3086)
Serum 25-Hydroxyvitamin D levels	OCD	Weighted mode	151	-0.140912	1.3786	0.918723	0.8686 (0.0583 to 12.9505)	-0.1409 (-2.8430 to 2.5611)
Calcium	AD	MR Egger	210	0.00399969	0.0141501	0.777718	1.0040 (0.9765 to 1.0322)	0.0040 (-0.0237 to 0.0317)
Calcium	AD	Weighted median	210	0.0129287	0.0138865	0.351841	1.0130 (0.9858 to 1.0410)	0.0129 (-0.0143 to 0.0401)
Calcium	AD	Inverse variance weighted	210	0.00392785	0.0081482	0.629769	1.0039 (0.9880 to 1.0201)	0.0039 (-0.0120 to 0.0199)
Calcium	AD	Simple mode	210	-0.0239026	0.0273956	0.383938	0.9764 (0.9253 to 1.0302)	-0.0239 (-0.0776 to 0.0298)
Calcium	AD	Weighted mode	210	0.00987624	0.0129782	0.447522	1.0099 (0.9846 to 1.0359)	0.0099 (-0.0156 to 0.0353)
Calcium	ADHD	MR Egger	186	0.00689548	0.0683884	0.919797	1.0069 (0.8806 to 1.1514)	0.0069 (-0.1271 to 0.1409)
Calcium	ADHD	Weighted median	186	0.0500665	0.0675667	0.458697	1.0513 (0.9209 to 1.2002)	0.0501 (-0.0824 to 0.1825)
Calcium	ADHD	Inverse variance weighted	186	0.051401	0.0395042	0.193206	1.0527 (0.9743 to 1.1375)	0.0514 (-0.0260 to 0.1288)
Calcium	ADHD	Simple mode	186	0.0070431	0.124159	0.954824	1.0071 (0.7895 to 1.2845)	0.0070 (-0.2363 to 0.2504)
Calcium	ADHD	Weighted mode	186	0.0070431	0.0609983	0.908203	1.0071 (0.8936 to 1.1350)	0.0070 (-0.1125 to 0.1266)
Calcium	An	MR Egger	207	-0.0784178	0.173502	0.651767	0.9246 (0.6580 to 1.2991)	-0.0784 (-0.4185 to 0.2616)
Calcium	An	Weighted median	207	-0.0370325	0.20489	0.856569	0.9636 (0.6449 to 1.4399)	-0.0370 (-0.4386 to 0.3646)
Calcium	An	Inverse variance weighted	207	-0.00528664	0.100156	0.957904	0.9947 (0.8174 to 1.2105)	-0.0053 (-0.2016 to 0.1910)
Calcium	An	Simple mode	207	-0.580144	0.402406	0.150909	0.5598 (0.2544 to 1.2319)	-0.5801 (-1.3689 to 0.2086)
Calcium	An	Weighted mode	207	-0.116546	0.186277	0.532231	0.8900 (0.6178 to 1.2822)	-0.1165 (-0.4816 to 0.2486)
Calcium	ASD	MR Egger	205	0.0617151	0.08954	0.491456	1.0637 (0.8925 to 1.2677)	0.0617 (-0.1138 to 0.2372)
Calcium	ASD	Weighted median	205	0.147657	0.0871524	0.0902197	1.1591 (0.9771 to 1.3750)	0.1477 (-0.0232 to 0.3185)
Calcium	ASD	Inverse variance weighted	205	-0.0244101	0.051084	0.632763	0.9759 (0.8829 to 1.0787)	-0.0244 (-0.1245 to 0.0757)
Calcium	ASD	Simple mode	205	0.0558913	0.207864	0.788291	1.0575 (0.7036 to 1.5893)	0.0559 (-0.3515 to 0.4633)
Calcium	ASD	Weighted mode	205	0.133787	0.0876626	0.128519	1.1431 (0.9627 to 1.3574)	0.1338 (-0.0380 to 0.3056)
Calcium	BD	MR Egger	211	0.0935001	0.0954854	0.328609	1.0980 (0.9106 to 1.3240)	0.0935 (-0.0937 to 0.2807)
Calcium	BD	Weighted median	211	0.103925	0.0764202	0.173856	1.1095 (0.9552 to 1.2888)	0.1039 (-0.0459 to 0.2537)
Calcium	BD	Inverse variance weighted	211	-0.0343081	0.0555147	0.536576	0.9663 (0.8667 to 1.0773)	-0.0343 (-0.1431 to 0.0745)
Calcium	BD	Simple mode	211	0.0229917	0.214246	0.914642	1.0233 (0.6724 to 1.5572)	0.0230 (-0.3969 to 0.4429)
Calcium	BD	Weighted mode	211	0.120207	0.0861765	0.164522	1.1277 (0.9525 to 1.3352)	0.1202 (-0.0487 to 0.2891)
Calcium	MDD	MR Egger	212	0.0171991	0.0273606	0.530287	1.0173 (0.9642 to 1.0734)	0.0172 (-0.0364 to 0.0708)
Calcium	MDD	Weighted median	212	0.0120988	0.0292451	0.679091	1.0122 (0.9558 to 1.0719)	0.0121 (-0.0452 to 0.0694)
Calcium	MDD	Inverse variance weighted	212	-0.000183444	0.0157387	0.9907	0.9998 (0.9694 to 1.0311)	-0.0002 (-0.0310 to 0.0307)
Calcium	MDD	Simple mode	212	0.0274044	0.058182	0.638119	1.0278 (0.9170 to 1.1519)	0.0274 (-0.0866 to 0.1414)
Calcium	MDD	Weighted mode	212	0.0171109	0.0262529	0.515256	1.0173 (0.9662 to 1.0710)	0.0171 (-0.0343 to 0.0686)
Calcium	OCD	MR Egger	204	-0.0580626	0.191956	0.762598	0.9436 (0.6477 to 1.3746)	-0.0581 (-0.4343 to 0.3182)
Calcium	OCD	Weighted median	204	-0.440645	0.208646	0.0346925	0.6436 (0.4276 to 0.9688)	-0.4406 (-0.8496 to -0.0317)
Calcium	OCD	Inverse variance weighted	204	-0.236828	0.111546	0.033742	0.7891 (0.6342 to 0.9820)	-0.2368 (-0.4555 to -0.0182)
Calcium	OCD	Simple mode	204	-0.554512	0.464888	0.234345	0.5744 (0.2309 to 1.4286)	-0.5545 (-1.4657 to 0.3567)
Calcium	OCD	Weighted mode	204	-0.386306	0.213568	0.0719589	0.6796 (0.4471 to 1.0328)	-0.3863 (-0.8049 to 0.0323)
Calcium	SCZ	MR Egger	207	0.050416	0.0674275	0.455493	1.0517 (0.9215 to 1.2003)	0.0504 (-0.0817 to 0.1826)
Calcium	SCZ	Weighted median	207	0.0534102	0.0601351	0.374449	1.0549 (0.9376 to 1.1868)	0.0534 (-0.0645 to 0.1713)
Calcium	SCZ	Inverse variance weighted	207	0.0114567	0.0386875	0.767128	1.0115 (0.9377 to 1.0912)	0.0115 (-0.0644 to 0.0873)
Calcium	SCZ	Simple mode	207	0.00539072	0.123165	0.965131	1.0054 (0.7898 to 1.2799)	0.0054 (-0.2360 to 0.2468)
Calcium	SCZ	Weighted mode	207	0.0396112	0.0567215	0.485749	1.0404 (0.9309 to 1.1627)	0.0396 (-0.0716 to 0.1508)
Calcium	TS	MR Egger	201	0.00894501	0.145205	0.950941	1.0090 (0.7591 to 1.3412)	0.0089 (-0.2757 to 0.2935)
Calcium	TS	Weighted median	201	-0.126225	0.164274	0.442262	0.8814 (0.6388 to 1.2162)	-0.1262 (-0.4482 to 0.1958)
Calcium	TS	Inverse variance weighted	201	0.0111508	0.0850592	0.895701	1.0112 (0.8559 to 1.1947)	0.0112 (-0.1556 to 0.1779)
Calcium	TS	Simple mode	201	-0.128957	0.335838	0.701397	0.8790 (0.4551 to 1.6977)	-0.1290 (-0.7872 to 0.5293)
Calcium	TS	Weighted mode	201	-0.128957	0.151234	0.394846	0.8790 (0.6535 to 1.1823)	-0.1290 (-0.4254 to 0.1675)
fibroblast growth factor 23	ASD	MR Egger	24	0.00811563	0.127977	0.950009	1.0081 (0.7845 to 1.2956)	0.0081 (-0.2427 to 0.2590)
fibroblast growth factor 23	ASD	Weighted median	24	-0.116512	0.0717917	0.104608	0.8900 (0.7732 to 1.0245)	-0.1165 (-0.2572 to 0.0242)
fibroblast growth factor 23	ASD	Inverse variance weighted	24	-0.134156	0.0511481	0.00871854	0.8745 (0.7910 to 0.9667)	-0.1342 (-0.2344 to -0.0339)
fibroblast growth factor 23	ASD	Simple mode	24	-0.115235	0.129323	0.38212	0.8912 (0.6916 to 1.1482)	-0.1152 (-0.3687 to 0.1382)
fibroblast growth factor 23	ASD	Weighted mode	24	-0.0899388	0.116253	0.44702	0.9140 (0.7278 to 1.1479)	-0.0899 (-0.3178 to 0.1379)
fibroblast growth factor 23	SCZ	MR Egger	24	0.00960859	0.108048	0.929943	1.0097 (0.8170 to 1.2478)	0.0096 (-0.2022 to 0.2214)
fibroblast growth factor 23	SCZ	Weighted median	24	-0.0676339	0.0483578	0.161929	0.9346 (0.8501 to 1.0275)	-0.0676 (-0.1624 to 0.0271)
fibroblast growth factor 23	SCZ	Inverse variance weighted	24	0.00299562	0.0424004	0.943676	1.0030 (0.9230 to 1.0899)	0.0030 (-0.0801 to 0.0861)
fibroblast growth factor 23	SCZ	Simple mode	24	-0.155958	0.109162	0.166538	0.8556 (0.6908 to 1.0597)	-0.1560 (-0.3699 to 0.0580)
fibroblast growth factor 23	SCZ	Weighted mode	24	-0.161076	0.121489	0.197907	0.8512 (0.6709 to 1.0801)	-0.1611 (-0.3992 to 0.0770)
fibroblast growth factor 23	ADHD	MR Egger	20	0.0281808	0.116221	0.811152	1.0286 (0.8190 to 1.2917)	0.0282 (-0.1996 to 0.2560)
fibroblast growth factor 23	ADHD	Weighted median	20	-0.0048236	0.0543684	0.929304	0.9952 (0.8946 to 1.1071)	-0.0048 (-0.1114 to 0.1017)
fibroblast growth factor 23	ADHD	Inverse variance weighted	20	0.0212312	0.0463452	0.646873	1.0215 (0.9328 to 1.1186)	0.0212 (-0.0696 to 0.1121)
fibroblast growth factor 23	ADHD	Simple mode	20	-0.0128013	0.0908509	0.889429	0.9873 (0.8262 to 1.1797)	-0.0128 (-0.1909 to 0.1653)
fibroblast growth factor 23	ADHD	Weighted mode	20	0.000835784	0.0678308	0.990297	1.0008 (0.8762 to 1.1431)	0.0008 (-0.1321 to 0.1338)
fibroblast growth factor 23	MDD	MR Egger	27	0.0292611	0.0339414	0.396822	1.0297 (0.9634 to 1.1005)	0.0293 (-0.0373 to 0.0958)
fibroblast growth factor 23	MDD	Weighted median	27	-0.00909846	0.019911	0.647702	0.9909 (0.9530 to 1.0304)	-0.0091 (-0.0481 to 0.0299)
fibroblast growth factor 23	MDD	Inverse variance weighted	27	-0.00692917	0.014279	0.627484	0.9931 (0.9657 to 1.0213)	-0.0069 (-0.0349 to 0.0211)
fibroblast growth factor 23	MDD	Simple mode	27	-0.00180964	0.0381679	0.962547	0.9982 (0.9262 to 1.0757)	-0.0018 (-0.0766 to 0.0730)
fibroblast growth factor 23	MDD	Weighted mode	27	0.00848277	0.0356155	0.813611	1.0085 (0.9405 to 1.0814)	0.0085 (-0.0613 to 0.0783)
fibroblast growth factor 23	AD	MR Egger	29	0.0194244	0.0228703	0.403167	1.0196 (0.9749 to 1.0664)	0.0194 (-0.0254 to 0.0643)
fibroblast growth factor 23	AD	Weighted median	29	0.0190198	0.0122678	0.121049	1.0192 (0.9950 to 1.0440)	0.0190 (-0.0050 to 0.0431)
fibroblast growth factor 23	AD	Inverse variance weighted	29	0.0116031	0.0102097	0.255758	1.0117 (0.9916 to 1.0321)	0.0116 (-0.0084 to 0.0316)
fibroblast growth factor 23	AD	Simple mode	29	0.0162197	0.0226823	0.480478	1.0164 (0.9722 to 1.0626)	0.0162 (-0.0282 to 0.0607)
fibroblast growth factor 23	AD	Weighted mode	29	0.0173194	0.0177414	0.33732	1.0175 (0.9827 to 1.0535)	0.0173 (-0.0175 to 0.0521)
fibroblast growth factor 23	BD	MR Egger	27	-0.0899127	0.118378	0.454632	0.9140 (0.7247 to 1.1527)	-0.0899 (-0.3219 to 0.1421)
fibroblast growth factor 23	BD	Weighted median	27	-0.103303	0.0696076	0.137789	0.9019 (0.7868 to 1.0337)	-0.1033 (-0.2397 to 0.0331)
fibroblast growth factor 23	BD	Inverse variance weighted	27	-0.0407418	0.0495861	0.411283	0.9601 (0.8712 to 1.0581)	-0.0407 (-0.1379 to 0.0564)
fibroblast growth factor 23	BD	Simple mode	27	-0.0831644	0.128766	0.524031	0.9202 (0.7149 to 1.1844)	-0.0832 (-0.3355 to 0.1692)
fibroblast growth factor 23	BD	Weighted mode	27	-0.156725	0.103127	0.140649	0.8549 (0.6985 to 1.0465)	-0.1567 (-0.3589 to 0.0454)
fibroblast growth factor 23	AN	MR Egger	27	0.378914	0.224368	0.103693	1.4607 (0.9410 to 2.2675)	0.3789 (-0.0608 to 0.8187)
fibroblast growth factor 23	AN	Weighted median	27	0.0631972	0.143327	0.659263	1.0652 (0.8043 to 1.4107)	0.0632 (-0.2177 to 0.3441)
fibroblast growth factor 23	AN	Inverse variance weighted	27	0.177288	0.0991165	0.0736666	1.1940 (0.9832 to 1.4500)	0.1773 (-0.0170 to 0.3716)
fibroblast growth factor 23	AN	Simple mode	27	0.0350379	0.305184	0.909479	1.0357 (0.5694 to 1.8836)	0.0350 (-0.5631 to 0.6332)
fibroblast growth factor 23	AN	Weighted mode	27	-0.0316685	0.263023	0.90509	0.9688 (0.5786 to 1.6223)	-0.0317 (-0.5472 to 0.4839)
fibroblast growth factor 23	TS	MR Egger	26	0.00357735	0.22731	0.987574	1.0036 (0.6428 to 1.5669)	0.0036 (-0.4419 to 0.4491)
fibroblast growth factor 23	TS	Weighted median	26	-0.00491904	0.126079	0.968878	0.9951 (0.7772 to 1.2740)	-0.0049 (-0.2520 to 0.2422)
fibroblast growth factor 23	TS	Inverse variance weighted	26	-0.156274	0.0893334	0.0802336	0.8553 (0.7179 to 1.0190)	-0.1563 (-0.3314 to 0.0188)
fibroblast growth factor 23	TS	Simple mode	26	0.0608571	0.226645	0.790508	1.0627 (0.6816 to 1.6571)	0.0609 (-0.3834 to 0.5051)
fibroblast growth factor 23	TS	Weighted mode	26	0.0846093	0.208281	0.688033	1.0883 (0.7235 to 1.6370)	0.0846 (-0.3236 to 0.4928)
fibroblast growth factor 23	OCD	MR Egger	28	-0.27069	0.286201	0.352957	0.7629 (0.4353 to 1.3368)	-0.2707 (-0.8316 to 0.2903)
fibroblast growth factor 23	OCD	Weighted median	28	-0.0553165	0.160017	0.729575	0.9462 (0.6915 to 1.2947)	-0.0553 (-0.3689 to 0.2583)
fibroblast growth factor 23	OCD	Inverse variance weighted	28	0.0303627	0.116233	0.793921	1.0308 (0.8208 to 1.2946)	0.0304 (-0.1975 to 0.2582)
fibroblast growth factor 23	OCD	Simple mode	28	-0.192333	0.301094	0.528347	0.8250 (0.4573 to 1.4886)	-0.1923 (-0.7825 to 0.3978)
fibroblast growth factor 23	OCD	Weighted mode	28	0.145567	0.267609	0.590938	1.1567 (0.6846 to 1.9544)	0.1456 (-0.3789 to 0.6701)
Parathyroid hormone	ASD	MR Egger	15	0.0220676	0.102963	0.833619	1.0223 (0.8355 to 1.2509)	0.0221 (-0.1797 to 0.2239)
Parathyroid hormone	ASD	Weighted median	15	0.00996693	0.0422512	0.813513	1.0100 (0.9297 to 1.0972)	0.0100 (-0.0728 to 0.0928)
Parathyroid hormone	ASD	Inverse variance weighted	15	0.0267887	0.0315713	0.396151	1.0272 (0.9655 to 1.0927)	0.0268 (-0.0351 to 0.0887)
Parathyroid hormone	ASD	Simple mode	15	0.00264953	0.0770057	0.973038	1.0027 (0.8622 to 1.1660)	0.0026 (-0.1483 to 0.1536)
Parathyroid hormone	ASD	Weighted mode	15	0.0121009	0.0768135	0.877072	1.0122 (0.8707 to 1.1766)	0.0121 (-0.1385 to 0.1627)
Parathyroid hormone	SCZ	MR Egger	15	0.0777704	0.0683452	0.275698	1.0809 (0.9454 to 1.2358)	0.0778 (-0.0562 to 0.2117)
Parathyroid hormone	SCZ	Weighted median	15	0.0199926	0.0273297	0.464454	1.0202 (0.9670 to 1.0763)	0.0200 (-0.0336 to 0.0736)
Parathyroid hormone	SCZ	Inverse variance weighted	15	0.0213166	0.0256217	0.405425	1.0215 (0.9715 to 1.0742)	0.0213 (-0.0289 to 0.0715)
Parathyroid hormone	SCZ	Simple mode	15	0.0128646	0.0451746	0.779986	1.0129 (0.9271 to 1.1067)	0.0129 (-0.0757 to 0.1014)
Parathyroid hormone	SCZ	Weighted mode	15	0.015515	0.0441987	0.730793	1.0156 (0.9314 to 1.1075)	0.0155 (-0.0711 to 0.1021)
Parathyroid hormone	ADHD	MR Egger	14	0.0976912	0.0934882	0.316636	1.1026 (0.9180 to 1.3244)	0.0977 (-0.0855 to 0.2809)
Parathyroid hormone	ADHD	Weighted median	14	0.0264095	0.0338343	0.435066	1.0268 (0.9609 to 1.0972)	0.0264 (-0.0399 to 0.0927)
Parathyroid hormone	ADHD	Inverse variance weighted	14	-0.00364863	0.0295709	0.901802	0.9964 (0.9403 to 1.0558)	-0.0036 (-0.0616 to 0.0543)
Parathyroid hormone	ADHD	Simple mode	14	0.0519861	0.0638037	0.429871	1.0534 (0.9295 to 1.1937)	0.0520 (-0.0731 to 0.1770)
Parathyroid hormone	ADHD	Weighted mode	14	0.0505411	0.0539294	0.365756	1.0518 (0.9463 to 1.1691)	0.0505 (-0.0552 to 0.1562)
Parathyroid hormone	MDD	MR Egger	16	-0.011282	0.0307081	0.718818	0.9888 (0.9310 to 1.0501)	-0.0113 (-0.0715 to 0.0489)
Parathyroid hormone	MDD	Weighted median	16	0.000896416	0.013231	0.945984	1.0009 (0.9753 to 1.0272)	0.0009 (-0.0250 to 0.0268)
Parathyroid hormone	MDD	Inverse variance weighted	16	-0.00181356	0.0111438	0.870722	0.9982 (0.9766 to 1.0202)	-0.0018 (-0.0237 to 0.0200)
Parathyroid hormone	MDD	Simple mode	16	0.00496306	0.0237437	0.837239	1.0050 (0.9593 to 1.0528)	0.0050 (-0.0416 to 0.0515)
Parathyroid hormone	MDD	Weighted mode	16	0.00553445	0.0220539	0.805257	1.0055 (0.9630 to 1.0500)	0.0055 (-0.0377 to 0.0488)
Parathyroid hormone	AD	MR Egger	20	0.00289905	0.013407	0.831237	1.0029 (0.9769 to 1.0296)	0.0029 (-0.0234 to 0.0292)
Parathyroid hormone	AD	Weighted median	20	-0.00533304	0.00611635	0.383245	0.9947 (0.9828 to 1.0067)	-0.0053 (-0.0173 to 0.0067)
Parathyroid hormone	AD	Inverse variance weighted	20	-0.00204533	0.00501052	0.683121	0.9980 (0.9882 to 1.0078)	-0.0020 (-0.0119 to 0.0078)
Parathyroid hormone	AD	Simple mode	20	-0.005622	0.00941853	0.557615	0.9944 (0.9762 to 1.0129)	-0.0056 (-0.0241 to 0.0128)
Parathyroid hormone	AD	Weighted mode	20	-0.00615181	0.00826982	0.466046	0.9939 (0.9779 to 1.0101)	-0.0062 (-0.0224 to 0.0101)
Parathyroid hormone	BD	MR Egger	18	-0.0751651	0.0949096	0.439965	0.9276 (0.7701 to 1.1172)	-0.0752 (-0.2612 to 0.1109)
Parathyroid hormone	BD	Weighted median	18	-0.0351668	0.0435227	0.419084	0.9654 (0.8865 to 1.0514)	-0.0352 (-0.1205 to 0.0501)
Parathyroid hormone	BD	Inverse variance weighted	18	0.02264	0.0356462	0.525343	1.0229 (0.9539 to 1.0969)	0.0226 (-0.0472 to 0.0925)
Parathyroid hormone	BD	Simple mode	18	-0.0811699	0.0911957	0.385855	0.9220 (0.7711 to 1.1025)	-0.0812 (-0.2599 to 0.0976)
Parathyroid hormone	BD	Weighted mode	18	-0.0772906	0.0941843	0.423215	0.9256 (0.7696 to 1.1133)	-0.0773 (-0.2619 to 0.1073)
Parathyroid hormone	AN	MR Egger	17	-0.0513994	0.188989	0.789353	0.9499 (0.6559 to 1.3758)	-0.0514 (-0.4218 to 0.3190)
Parathyroid hormone	AN	Weighted median	17	0.0246679	0.0849226	0.771453	1.0250 (0.8678 to 1.2106)	0.0247 (-0.1418 to 0.1911)
Parathyroid hormone	AN	Inverse variance weighted	17	-0.0035402	0.0639554	0.955856	0.9965 (0.8791 to 1.1295)	-0.0035 (-0.1289 to 0.1218)
Parathyroid hormone	AN	Simple mode	17	0.0659798	0.156974	0.679841	1.0682 (0.7853 to 1.4530)	0.0660 (-0.2417 to 0.3736)
Parathyroid hormone	AN	Weighted mode	17	0.083561	0.134423	0.542945	1.0872 (0.8353 to 1.4149)	0.0836 (-0.1799 to 0.3470)
Parathyroid hormone	TS	MR Egger	17	-0.0793003	0.173556	0.654278	0.9238 (0.6574 to 1.2981)	-0.0793 (-0.4195 to 0.2609)
Parathyroid hormone	TS	Weighted median	17	-0.0094644	0.0838526	0.910134	0.9906 (0.8405 to 1.1675)	-0.0095 (-0.1738 to 0.1549)
Parathyroid hormone	TS	Inverse variance weighted	17	-0.00195929	0.0619415	0.974766	0.9980 (0.8839 to 1.1269)	-0.0020 (-0.1234 to 0.1194)
Parathyroid hormone	TS	Simple mode	17	-0.0222835	0.140944	0.876355	0.9780 (0.7419 to 1.2891)	-0.0223 (-0.2985 to 0.2540)
Parathyroid hormone	TS	Weighted mode	17	-0.0255693	0.140325	0.857703	0.9748 (0.7404 to 1.2833)	-0.0256 (-0.3006 to 0.2495)
Parathyroid hormone	OCD	MR Egger	16	-0.434137	0.215568	0.0636504	0.6478 (0.4246 to 0.9884)	-0.4341 (-0.8567 to -0.0116)
Parathyroid hormone	OCD	Weighted median	16	-0.235522	0.111258	0.0342688	0.7902 (0.6353 to 0.9827)	-0.2355 (-0.4536 to -0.0175)
Parathyroid hormone	OCD	Inverse variance weighted	16	-0.0945447	0.0774979	0.222478	0.9098 (0.7816 to 1.0590)	-0.0945 (-0.2464 to 0.0574)
Parathyroid hormone	OCD	Simple mode	16	-0.311256	0.224491	0.185859	0.7325 (0.4718 to 1.1374)	-0.3113 (-0.7513 to 0.1287)
Parathyroid hormone	OCD	Weighted mode	16	-0.307213	0.228706	0.199158	0.7355 (0.4698 to 1.1515)	-0.3072 (-0.7555 to 0.1411)
ASD, autism spectrum disorder; ADHD, attention-deficit/hyperactivity disorder; SCZ, schizophrenia; BD, bipolar disorder; MDD, major depressive disorder; AD, Alzheimer’s disease; AN, anorexia nervosa; OCD, obsessive-compulsive disorder; TS, Tourette syndrome; MR, Mendelian randomization; SE, standard error; SNP, Single nucleotide polymorphism; IVW, inverse-variance weighted; OR, Odds ratio; CI, Co…

## Sheet: Table S5
Table S5. MVMR estimation between calcium and OCD.
Exposure	Outcome	Bias	Method	Pvalue	OR (95% CI)
Calcium	OCD	Years of schooling	MVMR_IVW	0.429852	0.9080 (0.7145 to 1.1539)
Calcium	OCD	Years of schooling	MVMR_Egger	0.289166	0.8551 (0.6401 to 1.1422)
Calcium	OCD	Years of schooling	MVMR_Robust	0.422692	0.8991 (0.6934 to 1.1660)
Calcium	OCD	Years of schooling	MVMR_median	0.164097	0.7880 (0.5633 to 1.1023)
Calcium	OCD	Years of schooling	MVMR_LASSO	0.361128	0.9012 (0.7210 to 1.1266)
Calcium	OCD	Adopted as a child	MVMR_IVW	0.0477915	0.7980 (0.6382 to 0.9978)
Calcium	OCD	Adopted as a child	MVMR_Egger	0.282525	0.7980 (0.5288 to 1.2043)
Calcium	OCD	Adopted as a child	MVMR_Robust	0.0296144	0.7737 (0.6140 to 0.9749)
Calcium	OCD	Adopted as a child	MVMR_median	0.0188123	0.6662 (0.4747 to 0.9349)
Calcium	OCD	Adopted as a child	MVMR_LASSO	0.00990377	0.7545 (0.6091 to 0.9346)
Calcium	OCD	Breastfed as a baby	MVMR_IVW	0.0724513	0.8283 (0.6744 to 1.0173)
Calcium	OCD	Breastfed as a baby	MVMR_Egger	0.924683	1.0165 (0.7234 to 1.4284)
Calcium	OCD	Breastfed as a baby	MVMR_Robust	0.0484792	0.8045 (0.6482 to 0.9986)
Calcium	OCD	Breastfed as a baby	MVMR_median	0.00758367	0.6719 (0.5018 to 0.8996)
Calcium	OCD	Breastfed as a baby	MVMR_LASSO	0.0114749	0.7701 (0.6289 to 0.9430)
Calcium	OCD	Household income	MVMR_IVW	0.16833	0.8614 (0.6967 to 1.0651)
Calcium	OCD	Household income	MVMR_Egger	0.165735	0.7984 (0.5806 to 1.0977)
Calcium	OCD	Household income	MVMR_Robust	0.118904	0.8363 (0.6681 to 1.0470)
Calcium	OCD	Household income	MVMR_median	0.026454	0.6973 (0.5072 to 0.9587)
Calcium	OCD	Household income	MVMR_LASSO	0.117383	0.8484 (0.6905 to 1.0423)
OCD, obsessive-compulsive disorder; MVMR, Multivaribale mendelian randomization; IVW, inverse-variance weighted; LASSO, least absolute shrinkage and selection operator; OR, Odds ratio; CI, Confidence interval.

## Sheet: Table S6
Table S6. MVMR estimation between ASD and 25OHD.
Exposure	Outcome	Bias	Method	Pvalue	BETA (95% CI)
ASD	25OHD	BMI	MVMR_IVW	0.00172496	-0.0219 (-0.0356 to -0.0082)
ASD	25OHD	BMI	MVMR_Egger	0.00889285	-0.0219 (-0.0356 to -0.0082)
ASD	25OHD	BMI	MVMR_Robust	0.0169857	-0.0160 (-0.0292 to -0.0029)
ASD	25OHD	BMI	MVMR_median	0.00515109	-0.0186 (-0.0316 to -0.0056)
ASD	25OHD	BMI	MVMR_LASSO	0.0780566	-0.0086 (-0.0182 to 0.0010)
ASD	25OHD	Obesity	MVMR_IVW	0.0299858	-0.0155 (-0.0295 to -0.0015)
ASD	25OHD	Obesity	MVMR_Egger	0.253864	-0.0155 (-0.0295 to -0.0015)
ASD	25OHD	Obesity	MVMR_Robust	0.0122333	-0.0152 (-0.0270 to -0.0033)
ASD	25OHD	Obesity	MVMR_median	0.051729	-0.0161 (-0.0324 to 0.0001)
ASD	25OHD	Obesity	MVMR_LASSO	0.00620822	-0.0156 (-0.0267 to -0.0044)
ASD	25OHD	Mineral supplements: Calcium	MVMR_IVW	0.00514207	-0.0163 (-0.0278 to -0.0049)
ASD	25OHD	Mineral supplements: Calcium	MVMR_Egger	0.546816	-0.0163 (-0.0278 to -0.0049)
ASD	25OHD	Mineral supplements: Calcium	MVMR_Robust	0.00512291	-0.0148 (-0.0252 to -0.0044)
ASD	25OHD	Mineral supplements: Calcium	MVMR_median	0.021596	-0.0159 (-0.0295 to -0.0023)
ASD	25OHD	Mineral supplements: Calcium	MVMR_LASSO	0.00263209	-0.0135 (-0.0223 to -0.0047)
ASD	25OHD	Mineral supplement use: Fish oil	MVMR_IVW	0.00357446	-0.0159 (-0.0267 to -0.0052)
ASD	25OHD	Mineral supplement use: Fish oil	MVMR_Egger	0.37246	-0.0159 (-0.0267 to -0.0052)
ASD	25OHD	Mineral supplement use: Fish oil	MVMR_Robust	0.00851611	-0.0143 (-0.0249 to -0.0036)
ASD	25OHD	Mineral supplement use: Fish oil	MVMR_median	0.0330974	-0.0154 (-0.0295 to -0.0012)
ASD	25OHD	Mineral supplement use: Fish oil	MVMR_LASSO	0.00876365	-0.0131 (-0.0229 to -0.0033)
ASD	25OHD	Mineral supplements: Vitamin D	MVMR_IVW	0.0226413	-0.0134 (-0.0249 to -0.0019)
ASD	25OHD	Mineral supplements: Vitamin D	MVMR_Egger	0.00577193	-0.0134 (-0.0249 to -0.0019)
ASD	25OHD	Mineral supplements: Vitamin D	MVMR_Robust	0.0255525	-0.0126 (-0.0237 to -0.0015)
ASD	25OHD	Mineral supplements: Vitamin D	MVMR_median	0.0920196	-0.0121 (-0.0261 to 0.0020)
ASD	25OHD	Mineral supplements: Vitamin D	MVMR_LASSO	0.0110409	-0.0118 (-0.0208 to -0.0027)
ASD	25OHD	Time spent outdoors in winter	MVMR_IVW	0.00395342	-0.0174 (-0.0292 to -0.0056)
ASD	25OHD	Time spent outdoors in winter	MVMR_Egger	0.0305943	-0.0174 (-0.0292 to -0.0056)
ASD	25OHD	Time spent outdoors in winter	MVMR_Robust	0.00232482	-0.0160 (-0.0263 to -0.0057)
ASD	25OHD	Time spent outdoors in winter	MVMR_median	0.0103405	-0.0178 (-0.0314 to -0.0042)
ASD	25OHD	Time spent outdoors in winter	MVMR_LASSO	0.00596057	-0.0126 (-0.0215 to -0.0036)
ASD	25OHD	Time spent outdoors in summer	MVMR_IVW	0.00377245	-0.0207 (-0.0346 to -0.0067)
ASD	25OHD	Time spent outdoors in summer	MVMR_Egger	0.164071	-0.0207 (-0.0346 to -0.0067)
ASD	25OHD	Time spent outdoors in summer	MVMR_Robust	0.000222573	-0.0215 (-0.0329 to -0.0101)
ASD	25OHD	Time spent outdoors in summer	MVMR_median	0.00683586	-0.0209 (-0.0361 to -0.0058)
ASD	25OHD	Time spent outdoors in summer	MVMR_LASSO	2.4e-06	-0.0236 (-0.0333 to -0.0138)
ASD, autism spectrum disorder; 25OHD, Serum 25-Hydroxyvitamin D; BMI, body mass index; MVMR, Multivaribale mendelian randomization; IVW, inverse-variance weighted; LASSO, least absolute shrinkage and selection operator; CI, Confidence interval.

## Sheet: Table S7
Table S7. MVMR estimation between SCZ and 25OHD.
Exposure	Outcome	Bias	Method	Pvalue	BETA (95% CI)
SCZ	25OHD	BMI	MVMR_IVW	1.56e-05	-0.0206 (-0.0299 to -0.0112)
SCZ	25OHD	BMI	MVMR_Egger	0.00264083	-0.0206 (-0.0299 to -0.0112)
SCZ	25OHD	BMI	MVMR_Robust	6.17e-05	-0.0197 (-0.0293 to -0.0100)
SCZ	25OHD	BMI	MVMR_median	3.04e-06	-0.0250 (-0.0355 to -0.0145)
SCZ	25OHD	BMI	MVMR_LASSO	3.51e-12	-0.0246 (-0.0316 to -0.0177)
SCZ	25OHD	Obesity	MVMR_IVW	2.72e-06	-0.0151 (-0.0214 to -0.0088)
SCZ	25OHD	Obesity	MVMR_Egger	0.178794	-0.0151 (-0.0214 to -0.0088)
SCZ	25OHD	Obesity	MVMR_Robust	3.91e-05	-0.0139 (-0.0205 to -0.0073)
SCZ	25OHD	Obesity	MVMR_median	0.00294583	-0.0108 (-0.0180 to -0.0037)
SCZ	25OHD	Obesity	MVMR_LASSO	7.23e-08	-0.0130 (-0.0177 to -0.0083)
SCZ	25OHD	Mineral supplements: Calcium	MVMR_IVW	3.37e-07	-0.0155 (-0.0215 to -0.0096)
SCZ	25OHD	Mineral supplements: Calcium	MVMR_Egger	0.0579589	-0.0155 (-0.0215 to -0.0096)
SCZ	25OHD	Mineral supplements: Calcium	MVMR_Robust	3.88e-06	-0.0145 (-0.0207 to -0.0084)
SCZ	25OHD	Mineral supplements: Calcium	MVMR_median	0.00120665	-0.0112 (-0.0180 to -0.0044)
SCZ	25OHD	Mineral supplements: Calcium	MVMR_LASSO	6.77e-10	-0.0143 (-0.0189 to -0.0098)
SCZ	25OHD	Mineral supplement use: Fish oil	MVMR_IVW	2.83e-06	-0.0145 (-0.0205 to -0.0084)
SCZ	25OHD	Mineral supplement use: Fish oil	MVMR_Egger	0.0514017	-0.0145 (-0.0205 to -0.0084)
SCZ	25OHD	Mineral supplement use: Fish oil	MVMR_Robust	2.7e-05	-0.0134 (-0.0197 to -0.0071)
SCZ	25OHD	Mineral supplement use: Fish oil	MVMR_median	0.00140511	-0.0113 (-0.0183 to -0.0044)
SCZ	25OHD	Mineral supplement use: Fish oil	MVMR_LASSO	9.17e-07	-0.0117 (-0.0164 to -0.0070)
SCZ	25OHD	Mineral supplements: Vitamin D	MVMR_IVW	4.33e-06	-0.0148 (-0.0211 to -0.0085)
SCZ	25OHD	Mineral supplements: Vitamin D	MVMR_Egger	0.0664346	-0.0148 (-0.0211 to -0.0085)
SCZ	25OHD	Mineral supplements: Vitamin D	MVMR_Robust	0.000101791	-0.0133 (-0.0201 to -0.0066)
SCZ	25OHD	Mineral supplements: Vitamin D	MVMR_median	0.0109083	-0.0093 (-0.0164 to -0.0021)
SCZ	25OHD	Mineral supplements: Vitamin D	MVMR_LASSO	1.07e-05	-0.0110 (-0.0159 to -0.0061)
SCZ	25OHD	Time spent outdoors in winter	MVMR_IVW	1.02e-06	-0.0151 (-0.0211 to -0.0090)
SCZ	25OHD	Time spent outdoors in winter	MVMR_Egger	0.0114776	-0.0151 (-0.0211 to -0.0090)
SCZ	25OHD	Time spent outdoors in winter	MVMR_Robust	1.33e-05	-0.0138 (-0.0200 to -0.0076)
SCZ	25OHD	Time spent outdoors in winter	MVMR_median	0.00094325	-0.0115 (-0.0183 to -0.0047)
SCZ	25OHD	Time spent outdoors in winter	MVMR_LASSO	3.23e-07	-0.0117 (-0.0162 to -0.0072)
SCZ	25OHD	Time spent outdoors in summer	MVMR_IVW	5.3e-05	-0.0132 (-0.0196 to -0.0068)
SCZ	25OHD	Time spent outdoors in summer	MVMR_Egger	0.170807	-0.0132 (-0.0196 to -0.0068)
SCZ	25OHD	Time spent outdoors in summer	MVMR_Robust	0.000344686	-0.0116 (-0.0180 to -0.0053)
SCZ	25OHD	Time spent outdoors in summer	MVMR_median	0.00115626	-0.0116 (-0.0186 to -0.0046)
SCZ	25OHD	Time spent outdoors in summer	MVMR_LASSO	0.000106	-0.0092 (-0.0139 to -0.0046)
SCZ, schizophrenia; 25OHD, Serum 25-Hydroxyvitamin D; BMI, body mass index; MVMR, Multivaribale mendelian randomization; IVW, inverse-variance weighted; LASSO, least absolute shrinkage and selection operator; CI, Confidence interval.

## Sheet: Table S8
Table S8. MVMR estimation between BD and 25OHD.
Exposure	Outcome	Bias	Method	Pvalue	BETA (95% CI)
BD	25OHD	BMI	MVMR_IVW	0.49461	-0.0039 (-0.0150 to 0.0072)
BD	25OHD	BMI	MVMR_Egger	0.0142642	-0.0039 (-0.0150 to 0.0072)
BD	25OHD	BMI	MVMR_Robust	0.562161	-0.0034 (-0.0149 to 0.0081)
BD	25OHD	BMI	MVMR_median	0.724096	-0.0021 (-0.0136 to 0.0094)
BD	25OHD	BMI	MVMR_LASSO	0.858221	0.0007 (-0.0074 to 0.0089)
BD	25OHD	Obesity	MVMR_IVW	0.00516683	-0.0116 (-0.0198 to -0.0035)
BD	25OHD	Obesity	MVMR_Egger	0.0019858	-0.0116 (-0.0198 to -0.0035)
BD	25OHD	Obesity	MVMR_Robust	0.0350384	-0.0093 (-0.0180 to -0.0007)
BD	25OHD	Obesity	MVMR_median	0.512412	-0.0027 (-0.0109 to 0.0055)
BD	25OHD	Obesity	MVMR_LASSO	0.0301813	-0.0065 (-0.0123 to -0.0006)
BD	25OHD	Mineral supplements: Calcium	MVMR_IVW	0.0165124	-0.0103 (-0.0188 to -0.0019)
BD	25OHD	Mineral supplements: Calcium	MVMR_Egger	0.515545	-0.0103 (-0.0188 to -0.0019)
BD	25OHD	Mineral supplements: Calcium	MVMR_Robust	0.0198526	-0.0098 (-0.0181 to -0.0016)
BD	25OHD	Mineral supplements: Calcium	MVMR_median	0.313416	-0.0043 (-0.0126 to 0.0040)
BD	25OHD	Mineral supplements: Calcium	MVMR_LASSO	0.00998578	-0.0075 (-0.0132 to -0.0018)
BD	25OHD	Mineral supplement use: Fish oil	MVMR_IVW	0.00617304	-0.0113 (-0.0194 to -0.0032)
BD	25OHD	Mineral supplement use: Fish oil	MVMR_Egger	0.00392346	-0.0113 (-0.0194 to -0.0032)
BD	25OHD	Mineral supplement use: Fish oil	MVMR_Robust	0.0131645	-0.0104 (-0.0185 to -0.0022)
BD	25OHD	Mineral supplement use: Fish oil	MVMR_median	0.176623	-0.0056 (-0.0138 to 0.0025)
BD	25OHD	Mineral supplement use: Fish oil	MVMR_LASSO	0.0148405	-0.0070 (-0.0127 to -0.0014)
BD	25OHD	Mineral supplements: Vitamin D	MVMR_IVW	0.0350537	-0.0089 (-0.0173 to -0.0006)
BD	25OHD	Mineral supplements: Vitamin D	MVMR_Egger	0.0118403	-0.0089 (-0.0173 to -0.0006)
BD	25OHD	Mineral supplements: Vitamin D	MVMR_Robust	0.0168063	-0.0093 (-0.0169 to -0.0017)
BD	25OHD	Mineral supplements: Vitamin D	MVMR_median	0.319813	-0.0041 (-0.0121 to 0.0040)
BD	25OHD	Mineral supplements: Vitamin D	MVMR_LASSO	0.000748303	-0.0094 (-0.0149 to -0.0039)
BD	25OHD	Time spent outdoors in winter	MVMR_IVW	0.00390515	-0.0114 (-0.0192 to -0.0037)
BD	25OHD	Time spent outdoors in winter	MVMR_Egger	0.141251	-0.0114 (-0.0192 to -0.0037)
BD	25OHD	Time spent outdoors in winter	MVMR_Robust	0.0153449	-0.0099 (-0.0179 to -0.0019)
BD	25OHD	Time spent outdoors in winter	MVMR_median	0.102408	-0.0072 (-0.0159 to 0.0014)
BD	25OHD	Time spent outdoors in winter	MVMR_LASSO	0.00342987	-0.0084 (-0.0140 to -0.0028)
BD	25OHD	Time spent outdoors in summer	MVMR_IVW	0.312841	-0.0049 (-0.0143 to 0.0046)
BD	25OHD	Time spent outdoors in summer	MVMR_Egger	0.338065	-0.0049 (-0.0143 to 0.0046)
BD	25OHD	Time spent outdoors in summer	MVMR_Robust	0.0540285	-0.0075 (-0.0152 to 0.0001)
BD	25OHD	Time spent outdoors in summer	MVMR_median	0.133026	-0.0071 (-0.0164 to 0.0022)
BD	25OHD	Time spent outdoors in summer	MVMR_LASSO	0.0069522	-0.0082 (-0.0141 to -0.0022)
BD, bipolar disorder; 25OHD, Serum 25-Hydroxyvitamin D; BMI, body mass index; MVMR, Multivaribale mendelian randomization; IVW, inverse-variance weighted; LASSO, least absolute shrinkage and selection operator; CI, Confidence interval.

## Sheet: Table S9
Table S9. MVMR estimation between ADHD and calcium.
Exposure	Outcome	Bias	Method	Pvalue	BETA (95% CI)
ADHD	calcium	BMI	MVMR_IVW	0.0204057	0.0150 (0.0023 to 0.0278)
ADHD	calcium	BMI	MVMR_Egger	0.021524	0.0150 (0.0023 to 0.0278)
ADHD	calcium	BMI	MVMR_Robust	0.101684	0.0091 (-0.0018 to 0.0199)
ADHD	calcium	BMI	MVMR_median	0.264235	0.0068 (-0.0052 to 0.0188)
ADHD	calcium	BMI	MVMR_LASSO	0.00613187	0.0112 (0.0032 to 0.0193)
ADHD	calcium	Obesity	MVMR_IVW	0.0184628	0.0178 (0.0030 to 0.0327)
ADHD	calcium	Obesity	MVMR_Egger	0.666347	0.0178 (0.0030 to 0.0327)
ADHD	calcium	Obesity	MVMR_Robust	0.0927076	0.0114 (-0.0019 to 0.0246)
ADHD	calcium	Obesity	MVMR_median	0.104677	0.0123 (-0.0026 to 0.0272)
ADHD	calcium	Obesity	MVMR_LASSO	0.039707	0.0103 (0.0005 to 0.0201)
ADHD	calcium	Mineral supplements: Calcium	MVMR_IVW	0.0394531	0.0153 (0.0007 to 0.0298)
ADHD	calcium	Mineral supplements: Calcium	MVMR_Egger	0.882451	0.0153 (0.0007 to 0.0298)
ADHD	calcium	Mineral supplements: Calcium	MVMR_Robust	0.159619	0.0089 (-0.0035 to 0.0214)
ADHD	calcium	Mineral supplements: Calcium	MVMR_median	0.252237	0.0078 (-0.0055 to 0.0211)
ADHD	calcium	Mineral supplements: Calcium	MVMR_LASSO	0.0261043	0.0103 (0.0012 to 0.0193)
ADHD	calcium	Mineral supplement use: Fish oil	MVMR_IVW	0.0278642	0.0147 (0.0016 to 0.0277)
ADHD	calcium	Mineral supplement use: Fish oil	MVMR_Egger	0.369789	0.0147 (0.0016 to 0.0277)
ADHD	calcium	Mineral supplement use: Fish oil	MVMR_Robust	0.158798	0.0090 (-0.0035 to 0.0216)
ADHD	calcium	Mineral supplement use: Fish oil	MVMR_median	0.401722	0.0058 (-0.0078 to 0.0194)
ADHD	calcium	Mineral supplement use: Fish oil	MVMR_LASSO	0.0401573	0.0096 (0.0004 to 0.0187)
ADHD	calcium	Mineral supplements: Vitamin D	MVMR_IVW	0.0176258	0.0156 (0.0027 to 0.0285)
ADHD	calcium	Mineral supplements: Vitamin D	MVMR_Egger	0.735087	0.0156 (0.0027 to 0.0285)
ADHD	calcium	Mineral supplements: Vitamin D	MVMR_Robust	0.124517	0.0098 (-0.0027 to 0.0223)
ADHD	calcium	Mineral supplements: Vitamin D	MVMR_median	0.202645	0.0088 (-0.0047 to 0.0224)
ADHD	calcium	Mineral supplements: Vitamin D	MVMR_LASSO	0.0174164	0.0111 (0.0020 to 0.0203)
ADHD	calcium	Time spent outdoors in winter	MVMR_IVW	0.057197	0.0123 (-0.0004 to 0.0249)
ADHD	calcium	Time spent outdoors in winter	MVMR_Egger	0.0834054	0.0123 (-0.0004 to 0.0249)
ADHD	calcium	Time spent outdoors in winter	MVMR_Robust	0.301815	0.0065 (-0.0058 to 0.0187)
ADHD	calcium	Time spent outdoors in winter	MVMR_median	0.477076	0.0048 (-0.0084 to 0.0180)
ADHD	calcium	Time spent outdoors in winter	MVMR_LASSO	0.262184	0.0052 (-0.0039 to 0.0143)
ADHD	calcium	Time spent outdoors in summer	MVMR_IVW	0.157007	0.0087 (-0.0033 to 0.0207)
ADHD	calcium	Time spent outdoors in summer	MVMR_Egger	0.0419246	0.0087 (-0.0033 to 0.0207)
ADHD	calcium	Time spent outdoors in summer	MVMR_Robust	0.481948	0.0043 (-0.0077 to 0.0163)
ADHD	calcium	Time spent outdoors in summer	MVMR_median	0.720086	0.0024 (-0.0108 to 0.0156)
ADHD	calcium	Time spent outdoors in summer	MVMR_LASSO	0.0512677	0.0086 (-0.0000 to 0.0172)
ADHD, attention-deficit/hyperactivity disorder; BMI, body mass index; MVMR, Multivaribale mendelian randomization; IVW, inverse-variance weighted; LASSO, least absolute shrinkage and selection operator; CI, Confidence interval.

[truncated: 1 more sheets: Table S10]
